# Supplementary material for: Identification of clinical trait-related small RNA biomarkers with weighted gene co-expression network analysis for personalized medicine in endocervical adenocarcinoma
Source: Aging (Albany NY). 2021 Sep 20;13(18):22361–74. doi: 10.18632/aging.203543 (PMC8507262; doi:10.18632/aging.203543)
Supplement: Supplementary Table 1 [file aging-13-203543-s001.xlsx]

## Sheet: tRF-1 32-Val-CAC-3
Supplementary Table 1. Small RNA sequencing data of patients with cervical cancer.
Predicted target genes for tRF-1_32-Val-CAC-3
# Column A: Seqname, the name the sequence.
# Column B: GeneSymbol, the official gene symbol of the sequence.
# Column C: Type, the type of the transcipt.
# Column D: Diagrams, the diagrams illustrate key features for miRNA binding. See Ref [1,2] for details.
# Column E: Total, the total number of the binding sites on the targets.
# Column F: Context+, the sum of the context+ scores used in TargetScan after version 6.0. More negative is better. See Ref [3] for details.
# Column G: Structure, the sum of the structure scores used in miRanda (Ref [4]). The higher the better.
# Column H: Energy, the sum of the free energy predicted by miRanda (Ref [4]). More negative is better.
# Column I ~ Column L: Counting numbers for different seed match types
# Reference:
[1] Grimson A., et al. MicroRNA Targeting Specificity in Mammals: Determinants beyond Seed Pairing. Molecular Cell, Volume 27, Issue 1, 91-105, 6 July 2007.
[2] Amy E. Pasquinelli. MicroRNAs and their targets: recognition, regulation and an emerging reciprocal relationship. Nature Reviews Genetics, Volume 13, 271-282, 1 April 2012.
[3] David M Garcia., et al. Weak Seed-Pairing Stability and High Target-Site Abundance Decrease the Proficiency of lsy-6 and Other miRNAs. Nat. Struct. Mol. Biol., Volume 18, 1139-1146, 2011.
[4] Enright AJ., el al. miRanda algorithm: MicroRNA targets in Drosophila. Genome Biology, Volume 5, R1, 2003.
Target genes for tRF-1_32-Val-CAC-3
Target			Sites		TargetScan	miranda		Seed match types				Annotations
Seqname	GeneSymbol	Type	Diagrams	Total	Context+	Structure	Energy	8mer-1a	7mer-m8	7mer-1a	Imperfect	UTR Length
ENST00000295006	CAPN2	Coding	Click Me	1	-0.169	154	-16.35	0	0	1	0	1341
ENST00000274278	UGT3A1	Coding	Click Me	1	-0.346	161	-23.28	0	1	0	0	3192
ENST00000340913	HNRNPA1	Coding	Click Me	1	-0.224	141	-27.49	0	1	0	0	670
ENST00000266604	LLPH	Coding	Click Me	1	-0.188	142	-14.28	0	0	1	0	7274
ENST00000274473	MEGF10	Coding	Click Me	1	-0.139	141	-16.59	0	0	1	0	3904
ENST00000309447	NWD2	Coding	Click Me	1	-0.206	149	-21.78	0	0	1	0	2248
ENST00000371852	CH25H	Coding	Click Me	1	-0.238	144	-15.32	0	0	1	0	537
ENST00000354534	SCN8A	Coding	Click Me	1	-0.183	143	-20.78	0	1	0	0	5451
ENST00000456145	C11orf21	Coding	Click Me	1	-0.177	145	-19.87	0	1	0	0	777
ENST00000376085	LRRC38	Coding	Click Me	1	-0.172	148	-21.83	0	0	1	0	869
ENST00000535373	ORC4	Coding	Click Me	1	-0.5	152	-17.06	1	0	0	0	5113
ENST00000642017	PNPO	Coding	Click Me	1	-0.197	142	-22.03	0	0	1	0	2526
ENST00000383763	TRIM71	Coding	Click Me	1	-0.183	140	-13.15	0	0	1	0	6027
ENST00000370589	MCOLN3	Coding	Click Me	1	-0.159	142	-22.89	0	0	1	0	3396
ENST00000339475	OTX2	Coding	Click Me	1	-0.224	142	-15.53	0	0	1	0	1028
ENST00000335117	ZNF486	Coding	Click Me	1	-0.21	155	-25.01	0	0	1	0	3833
ENST00000331433	CLCNKA	Coding	Click Me	1	-0.144	141	-20.25	0	0	1	0	392
ENST00000353151	CSN2	Coding	Click Me	1	-0.219	143	-15.48	0	0	1	0	373
ENST00000324417	SLC34A1	Coding	Click Me	1	-0.195	140	-16.19	0	0	1	0	562
ENST00000299340	CYYR1	Coding	Click Me	1	-0.158	151	-19.31	0	0	1	0	2292
ENST00000367435	CDC73	Coding	Click Me	1	-0.108	157	-21.19	0	0	1	0	11349
ENST00000381844	YWHAQ	Coding	Click Me	1	-0.128	146	-14.84	0	0	1	0	1319
ENST00000361820	GRIN3A	Coding	Click Me	1	-0.209	158	-29.34	0	1	0	0	3822
ENST00000360359	ANKS1A	Coding	Click Me	1	-0.187	161	-29.05	0	1	0	0	2804
ENST00000264515	RBBP5	Coding	Click Me	1	-0.177	142	-16.43	0	0	1	0	3098
ENST00000334731	C9orf85	Coding	Click Me	1	-0.182	160	-21.34	0	0	1	0	2060
ENST00000265026	MAP3K13	Coding	Click Me	1	-0.166	152	-23.07	0	1	0	0	6641
ENST00000370920	ZRANB2	Coding	Click Me	1	-0.176	153	-19.26	0	0	1	0	1829
MICT00000368546	CATG00000110053.1	Coding	Click Me	1	-0.402	152	-25.66	1	0	0	0	1000
ENST00000497571	KLF6	Coding	Click Me	1	-0.159	140	-22.29	0	0	1	0	3543
ENST00000641600	OR8H1	Coding	Click Me	1	-0.144	145	-18.18	0	0	1	0	1665
ENST00000255858	SEC14L4	Coding	Click Me	1	-0.101	149	-18.61	0	0	1	0	1196
ENST00000296582	TMEM184C	Coding	Click Me	3	-0.421	461	-58.63	0	0	3	0	3274
ENCT00000002257	CATG00000038794.1	Coding	Click Me	1	-0.192	147	-21.79	0	1	0	0	1000
ENST00000296741	ENPP6	Coding	Click Me	1	-0.184	151	-22.21	0	0	1	0	5242
ENST00000324068	CAPN6	Coding	Click Me	1	-0.242	165	-24.32	1	0	0	0	1478
ENST00000368547	ECHS1	Coding	Click Me	1	-0.112	155	-23.61	0	1	0	0	502
ENST00000398145	HPS4	Coding	Click Me	1	-0.124	145	-16.19	0	0	1	0	2350
ENST00000608382	ZBTB25	Coding	Click Me	1	-0.136	141	-17.55	0	0	1	0	8872
ENST00000231790	MLH1	Coding	Click Me	1	-0.202	140	-22.12	0	0	1	0	824
ENST00000418063	ZNF90	Coding	Click Me	2	-0.352	302	-36.83	0	1	1	0	1808
ENST00000243347	TNFAIP6	Coding	Click Me	1	-0.215	145	-21.5	0	0	1	0	515
ENST00000397677	CHMP7	Coding	Click Me	2	-0.398	305	-41.79	0	1	1	0	1393
ENST00000369563	DCLRE1B	Coding	Click Me	1	-0.192	148	-19.95	0	0	1	0	2139
ENST00000320172	TENT5A	Coding	Click Me	1	-0.163	143	-16.22	0	0	1	0	3965
ENST00000307142	SYNPO2	Coding	Click Me	1	-0.529	163	-17.36	1	0	0	0	3313
ENST00000307635	ZNF556	Coding	Click Me	1	-0.151	152	-20.18	0	0	1	0	5116
ENST00000378585	GABRD	Coding	Click Me	1	-0.355	179	-24.97	1	0	0	0	471
ENST00000532798	CCDC179	Coding	Click Me	1	-0.477	146	-16.2	1	0	0	0	588
ENCT00000482353	CATG00000114608.1	Coding	Click Me	1	-0.316	159	-19.25	1	0	0	0	1000
ENST00000455146	COG6	Coding	Click Me	1	-0.1	152	-19.48	0	0	1	0	3740
ENST00000381337	THUMPD1	Coding	Click Me	1	-0.328	198	-32.32	0	1	0	0	2715
ENST00000381334	TMEM165	Coding	Click Me	1	-0.206	146	-16.31	0	0	1	0	723
ENST00000618629	DAOA	Coding	Click Me	1	-0.259	167	-25.46	0	1	0	0	906
ENST00000261745	NAA25	Coding	Click Me	1	-0.125	158	-16.92	0	0	1	0	3190
ENST00000335420	KLHDC10	Coding	Click Me	1	-0.258	152	-16.93	1	0	0	0	4984
ENST00000371989	SURF4	Coding	Click Me	1	-0.229	142	-19.75	0	1	0	0	2045
ENST00000369701	SORCS3	Coding	Click Me	1	-0.249	156	-20.95	0	0	1	0	1861
ENST00000359543	EMP2	Coding	Click Me	1	-0.167	152	-17.95	0	0	1	0	4810
ENST00000328224	KCNA4	Coding	Click Me	1	-0.169	144	-19.58	0	0	1	0	976
ENST00000429277	LDB3	Coding	Click Me	1	-0.106	150	-18.87	0	0	1	0	6994
ENST00000291574	TRAPPC10	Coding	Click Me	1	-0.165	147	-18.37	0	0	1	0	3021
ENST00000334268	TRDN	Coding	Click Me	1	-0.164	146	-17.94	0	1	0	0	2262
ENST00000287394	ATAD2	Coding	Click Me	1	-0.228	143	-22.22	0	0	1	0	1337
ENST00000445307	CLDN34	Coding	Click Me	1	-0.194	149	-17.63	0	0	1	0	350
ENST00000379982	RHOBTB3	Coding	Click Me	1	-0.183	143	-21.5	0	1	0	0	3193
MICT00000211400	CATG00000047322.1	Coding	Click Me	1	-0.196	161	-23.71	0	1	0	0	1000
ENST00000260505	TTLL7	Coding	Click Me	1	-0.168	153	-23.79	0	0	1	0	4934
ENST00000389048	ALK	Coding	Click Me	1	-0.264	144	-18.06	0	1	0	0	450
ENST00000589717	ZNF253	Coding	Click Me	1	-0.103	148	-16.31	0	0	1	0	1927
MICT00000099952	CATG00000016383.1	Coding	Click Me	1	-0.399	172	-18.99	1	0	0	0	1000
ENST00000369146	SV2A	Coding	Click Me	1	-0.356	148	-19.07	0	1	0	0	1696
ENST00000378053	FLRT3	Coding	Click Me	2	-0.243	290	-38.38	0	0	2	0	2569
ENST00000315475	ZNF354C	Coding	Click Me	1	-0.124	144	-16.86	0	0	1	0	3440
ENCT00000067641	CATG00000002574.1	Coding	Click Me	1	-0.12	141	-24.19	0	1	0	0	1000
ENST00000312319	ELF5	Coding	Click Me	1	-0.188	140	-17.11	0	1	0	0	1422
ENST00000392687	CERS6	Coding	Click Me	1	-0.168	141	-15.42	0	0	1	0	5472
ENST00000358525	SLC6A20	Coding	Click Me	1	-0.203	145	-19.95	0	1	0	0	3528
ENST00000361028	ZSCAN12	Coding	Click Me	1	-0.105	152	-22.49	1	0	0	0	3534
ENST00000598930	AC024257.1	Coding	Click Me	1	-0.235	163	-22.08	0	0	1	0	1346
ENST00000244519	BTN3A3	Coding	Click Me	1	-0.176	143	-22.42	0	0	1	0	1004
ENST00000249014	CDC42EP1	Coding	Click Me	1	-0.196	163	-18.12	0	1	0	0	1422
ENCT00000113077	CATG00000014934.1	Coding	Click Me	1	-0.263	155	-17.65	0	1	0	0	1000
ENCT00000279299	CATG00000057879.1	Coding	Click Me	1	-0.322	171	-26.58	1	0	0	0	1000
NM_001197051	ZFP91-CNTF	Coding	Click Me	1	-0.193	143	-15.11	0	0	1	0	3844
ENST00000610854	NEFL	Coding	Click Me	1	-0.17	160	-17.86	0	0	1	0	1855
ENST00000371538	COA7	Coding	Click Me	1	-0.133	148	-21.75	0	0	1	0	3292
ENST00000382374	MICU2	Coding	Click Me	1	-0.185	151	-17.49	0	0	1	0	560
ENST00000392429	TMEM200A	Coding	Click Me	1	-0.159	146	-16.56	0	0	1	0	1163
ENST00000304883	TACR3	Coding	Click Me	1	-0.166	141	-15.79	0	0	1	0	3651
FTMT29200000673	CATG00000110325.1	Coding	Click Me	1	-0.374	157	-18.44	1	0	0	0	1000
ENST00000373365	GLO1	Coding	Click Me	1	-0.24	161	-17.98	0	1	0	0	1370
ENST00000285928	LRGUK	Coding	Click Me	1	-0.181	148	-18.4	0	0	1	0	616
ENST00000425234	BTN3A1	Coding	Click Me	2	-0.358	283	-40.99	0	0	2	0	2686
ENST00000376257	TCF19	Coding	Click Me	1	-0.128	156	-17.32	0	0	1	0	1629
ENST00000336643	SLC39A9	Coding	Click Me	1	-0.183	148	-21.16	0	0	1	0	1958
ENST00000230321	MDFI	Coding	Click Me	1	-0.152	145	-24.67	0	0	1	0	671
ENST00000395568	PPHLN1	Coding	Click Me	1	-0.15	148	-19.77	0	1	0	0	709
FTMT22000006530	CATG00000077030.1	Coding	Click Me	2	-0.731	291	-30.74	2	0	0	0	1000
ENST00000308271	USP48	Coding	Click Me	1	-0.156	141	-20.7	0	0	1	0	838
ENST00000248071	KLF2	Coding	Click Me	1	-0.18	152	-25.53	1	0	0	0	6306
ENST00000263408	C9	Coding	Click Me	1	-0.377	166	-20.97	1	0	0	0	937
ENST00000263409	LIFR	Coding	Click Me	1	-0.236	148	-14.46	0	0	1	0	6632
ENST00000380079	STEAP4	Coding	Click Me	1	-0.209	176	-27.97	1	0	0	0	2969
ENST00000375527	ZBTB12	Coding	Click Me	1	-0.171	159	-24.24	0	1	0	0	1505
ENST00000258739	KDELR2	Coding	Click Me	1	-0.483	165	-20.5	1	0	0	0	2121
ENST00000274368	CRHBP	Coding	Click Me	1	-0.207	140	-15.34	0	0	1	0	589
ENST00000355832	ERCC6	Coding	Click Me	1	-0.239	149	-17.31	0	1	0	0	4337
ENST00000340855	IDS	Coding	Click Me	1	-0.143	164	-20.08	1	0	0	0	5756
ENST00000366621	KCNK1	Coding	Click Me	1	-0.409	153	-19.28	1	0	0	0	5132
ENST00000259512	DERL1	Coding	Click Me	1	-0.208	152	-21.66	0	0	1	0	2283
ENST00000262919	ATRN	Coding	Click Me	1	-0.139	145	-22.5	0	0	1	0	4275
HBMT00000380478	CATG00000014206.1	Coding	Click Me	1	-0.536	156	-19.13	1	0	0	0	1000
ENST00000256190	SBF2	Coding	Click Me	1	-0.12	143	-16.98	0	0	1	0	1751
MICT00000051450	CATG00000116955.1	Coding	Click Me	1	-0.288	147	-16.57	0	1	0	0	1000
ENST00000342743	TMEM215	Coding	Click Me	1	-0.19	142	-16.08	0	0	1	0	4310
ENST00000465139	ANP32A	Coding	Click Me	1	-0.272	151	-15.93	1	0	0	0	1546
ENST00000293894	SOX8	Coding	Click Me	1	-0.263	173	-22.41	0	1	0	0	1593
ENST00000261024	SLC40A1	Coding	Click Me	1	-0.204	144	-19.61	0	0	1	0	1299
ENST00000369950	IMPG1	Coding	Click Me	1	-0.17	146	-18.9	0	0	1	0	975
ENST00000372406	GPR107	Coding	Click Me	1	-0.141	140	-27.25	0	1	0	0	5043
ENST00000175756	PTPN18	Coding	Click Me	1	-0.109	158	-18.38	0	0	1	0	2185
ENST00000231498	NUP155	Coding	Click Me	1	-0.194	155	-23.02	0	0	1	0	5479
ENST00000543796	RAN	Coding	Click Me	1	-0.153	153	-14.9	0	0	1	0	2043
ENST00000357084	ATP2A1	Coding	Click Me	1	-0.435	156	-15.4	1	0	0	0	304
ENST00000357085	TRIM38	Coding	Click Me	1	-0.184	144	-17.37	0	0	1	0	7569
ENST00000367242	TMEM183A	Coding	Click Me	1	-0.188	140	-16.77	0	0	1	0	1808
ENST00000296591	EDIL3	Coding	Click Me	1	-0.232	146	-13.6	0	0	1	0	3930
ENST00000355016	H2BFM	Coding	Click Me	1	-0.193	157	-21.87	0	1	0	0	1389
ENST00000216487	RIN3	Coding	Click Me	1	-0.195	153	-20.68	0	1	0	0	742
ENST00000257527	ADAM19	Coding	Click Me	1	-0.368	148	-15.02	1	0	0	0	3884
ENCT00000371565	CATG00000083638.1	Coding	Click Me	1	-0.206	148	-26.29	0	1	0	0	1000
ENST00000336811	ANG	Coding	Click Me	1	-0.107	141	-17.43	0	0	1	0	3495
ENST00000335255	FOXK2	Coding	Click Me	1	-0.1	174	-22.62	1	0	0	0	3108
ENST00000389622	CRYBG3	Coding	Click Me	1	-0.174	153	-21.78	0	0	1	0	1672
ENST00000423759	TAF1	Coding	Click Me	2	-0.542	319	-41.86	1	0	1	0	1958
ENST00000270349	SLC6A3	Coding	Click Me	1	-0.175	144	-16	0	0	1	0	1945
ENST00000317799	HADHB	Coding	Click Me	1	-0.225	147	-16.07	0	0	1	0	515
ENST00000361384	DCLRE1A	Coding	Click Me	1	-0.172	146	-19.86	0	0	1	0	428
ENST00000373020	TSPAN6	Coding	Click Me	1	-0.164	165	-23.81	0	0	1	0	2928
ENST00000622277	SNX12	Coding	Click Me	1	-0.12	141	-23.46	0	0	1	0	1767
ENST00000320892	RNF144A	Coding	Click Me	1	-0.195	141	-17.17	0	0	1	0	4423
ENST00000332958	RFX6	Coding	Click Me	1	-0.237	171	-23.08	0	1	0	0	1281
ENST00000283285	CD96	Coding	Click Me	1	-0.107	140	-22.09	0	0	1	0	2435
ENST00000622074	GREM1	Coding	Click Me	1	-0.137	147	-20.85	0	0	1	0	13862
ENST00000339137	C9orf153	Coding	Click Me	1	-0.165	141	-14.35	0	0	1	0	1441
ENST00000268616	ZCCHC14	Coding	Click Me	1	-0.12	142	-23.45	0	0	1	0	4045
ENST00000422081	AC244197.3	Coding	Click Me	1	-0.143	164	-20.08	1	0	0	0	5756
ENST00000422087	PNPLA8	Coding	Click Me	1	-0.187	153	-21.83	0	0	1	0	774
ENST00000485050	QTRT2	Coding	Click Me	1	-0.177	153	-20.74	0	0	1	0	2445
ENST00000313237	PHF21B	Coding	Click Me	1	-0.249	153	-20.49	0	1	0	0	1924
ENST00000253329	PPIL4	Coding	Click Me	1	-0.3	156	-15.64	0	1	0	0	3782
ENST00000374332	MAN1C1	Coding	Click Me	1	-0.152	143	-13.72	0	0	1	0	2418
ENST00000582970	RNF213	Coding	Click Me	1	-0.127	145	-20.56	0	1	0	0	5288
ENST00000254442	WDR7	Coding	Click Me	1	-0.15	145	-16.12	1	0	0	0	4390
ENST00000441259	PRF1	Coding	Click Me	1	-0.132	146	-18.5	0	0	1	0	704
ENST00000250101	TXNDC17	Coding	Click Me	1	-0.199	153	-19.31	0	1	0	0	1576
MICT00000343563	CATG00000098775.1	Coding	Click Me	1	-0.349	145	-14.29	1	0	0	0	1000
ENST00000358602	ANKRD17	Coding	Click Me	1	-0.256	147	-19.78	0	1	0	0	2855
ENST00000598581	SLC6A14	Coding	Click Me	2	-0.375	294	-33.68	0	0	2	0	2501
ENST00000313835	GPR89A	Coding	Click Me	1	-0.165	140	-20.52	0	0	1	0	608
ENST00000424930	ZNF419	Coding	Click Me	1	-0.167	155	-19.92	0	0	1	0	558
ENST00000379687	BCLAF3	Coding	Click Me	1	-0.155	141	-15.88	0	0	1	0	4445
ENST00000374242	INIP	Coding	Click Me	1	-0.201	140	-15.41	0	0	1	0	3873
ENST00000378026	CKAP4	Coding	Click Me	1	-0.164	140	-20.29	0	0	1	0	2872
ENST00000545128	PCSK5	Coding	Click Me	1	-0.116	144	-17.54	0	0	1	0	3417
ENST00000316660	PMAIP1	Coding	Click Me	2	-0.325	303	-44.87	0	0	2	0	1553
ENST00000374466	CSGALNACT2	Coding	Click Me	1	-0.229	148	-22.85	0	1	0	0	3133
ENST00000225298	UTP18	Coding	Click Me	1	-0.211	146	-20.59	0	0	1	0	169
ENST00000329099	RFLNB	Coding	Click Me	1	-0.128	151	-22.78	0	0	1	0	3186
ENST00000302103	FUT9	Coding	Click Me	1	-0.122	163	-21.84	0	1	0	0	11377
ENST00000425538	MYOCD	Coding	Click Me	1	-0.117	146	-19.4	0	0	1	0	5305
ENST00000392982	VWA2	Coding	Click Me	1	-0.208	147	-16.85	0	0	1	0	3263
ENST00000260408	ADAM10	Coding	Click Me	1	-0.116	143	-17.6	0	0	1	0	2936
ENST00000539664	TRIL	Coding	Click Me	1	-0.147	152	-14.28	0	0	1	0	2253
ENST00000370017	FNDC7	Coding	Click Me	1	-0.206	145	-14.98	0	0	1	0	853
ENST00000611864	MGAT4C	Coding	Click Me	1	-0.16	161	-25.89	0	0	1	0	23622
ENST00000228820	PARP11	Coding	Click Me	1	-0.108	147	-17.56	0	0	1	0	3262
ENST00000646733	MARVELD2	Coding	Click Me	1	-0.163	152	-17.52	0	0	1	0	2558
ENST00000280020	KIAA1328	Coding	Click Me	2	-0.364	308	-37.96	1	0	1	0	3097
ENST00000582401	TXNIP	Coding	Click Me	1	-0.262	140	-12.78	0	0	1	0	1405
ENST00000402744	CPE	Coding	Click Me	1	-0.18	152	-21.47	0	0	1	0	5577
MICT00000180707	CATG00000039813.1	Coding	Click Me	1	-0.204	158	-27.93	0	1	0	0	1000
ENST00000396403	ZNF813	Coding	Click Me	1	-0.137	167	-22.06	0	1	0	0	4172
ENST00000311946	NIPAL4	Coding	Click Me	1	-0.12	141	-18.38	0	0	1	0	1762
ENST00000302746	PDHB	Coding	Click Me	2	-0.655	303	-36.11	1	0	1	0	2880
ENST00000233057	EIF2AK2	Coding	Click Me	1	-0.333	148	-22.08	1	0	0	0	8063
ENCT00000458181	CATG00000109075.1	Coding	Click Me	1	-0.11	142	-24.33	0	1	0	0	1000
ENST00000325103	HPS1	Coding	Click Me	1	-0.172	146	-23.85	0	0	1	0	1366
MICT00000277848	CATG00000079011.1	Coding	Click Me	1	-0.317	147	-15.73	1	0	0	0	1000
ENST00000315467	GCSH	Coding	Click Me	1	-0.262	188	-26.18	0	1	0	0	4635
ENST00000442544	DCC	Coding	Click Me	1	-0.179	149	-20.65	0	0	1	0	5250
ENST00000263054	SORCS1	Coding	Click Me	1	-0.153	149	-25.32	0	0	1	0	3757
ENST00000304743	PCNX1	Coding	Click Me	1	-0.222	154	-15.26	0	0	1	0	5447
ENST00000530128	HTN3	Coding	Click Me	1	-0.179	145	-16.11	0	0	1	0	544
ENST00000282538	GADL1	Coding	Click Me	1	-0.202	140	-14.04	0	0	1	0	2042
ENST00000304987	SIK2	Coding	Click Me	1	-0.187	140	-19.45	0	0	1	0	6724
ENST00000605860	UPP2	Coding	Click Me	1	-0.174	142	-17.57	0	0	1	0	1264
ENST00000505747	THUMPD2	Coding	Click Me	1	-0.279	140	-17.95	0	1	0	0	701
ENST00000262457	INVS	Coding	Click Me	1	-0.159	142	-12.41	0	0	1	0	1499
ENST00000308268	PSMA8	Coding	Click Me	1	-0.248	166	-20.78	0	1	0	0	944
ENST00000315792	TCIM	Coding	Click Me	1	-0.131	140	-19.72	0	0	1	0	1722
ENST00000499666	LAMTOR3	Coding	Click Me	1	-0.137	149	-19.83	0	0	1	0	3658
ENST00000337386	NAB1	Coding	Click Me	1	-0.159	155	-17.92	0	0	1	0	2433
ENST00000332687	RLIM	Coding	Click Me	1	-0.246	143	-14.62	0	0	1	0	8464
ENST00000643927	PRKCB	Coding	Click Me	1	-0.148	156	-22.84	0	0	1	0	5795
ENST00000373765	MATN1	Coding	Click Me	1	-0.106	140	-25.03	0	0	1	0	2305
ENST00000274458	COMMD10	Coding	Click Me	1	-0.267	149	-21.72	0	1	0	0	2370
ENST00000538255	CTSV	Coding	Click Me	1	-0.137	144	-17.94	1	0	0	0	3270
ENST00000417133	ERG	Coding	Click Me	1	-0.115	141	-23.54	0	0	1	0	3376
ENST00000321844	GVQW3	Coding	Click Me	1	-0.197	151	-16.85	0	1	0	0	4094
ENST00000299106	JAM3	Coding	Click Me	1	-0.381	166	-21.66	1	0	0	0	2820
ENST00000306904	RBMXL2	Coding	Click Me	1	-0.153	143	-20.33	0	0	1	0	849
ENST00000368806	TCHHL1	Coding	Click Me	1	-0.186	142	-14.77	0	0	1	0	823
ENST00000620347	SLC1A7	Coding	Click Me	1	-0.428	162	-24.76	1	0	0	0	489
ENST00000620340	RPS6KA6	Coding	Click Me	1	-0.13	162	-15.55	1	0	0	0	5931
ENST00000061240	TLL1	Coding	Click Me	1	-0.21	157	-15.85	0	0	1	0	3581
ENST00000524270	SPSB2	Coding	Click Me	1	-0.163	148	-21.09	0	1	0	0	257
ENST00000262053	ATF1	Coding	Click Me	1	-0.144	146	-19.33	0	0	1	0	1381
ENST00000339452	DCHS2	Coding	Click Me	1	-0.179	143	-17.19	0	0	1	0	584
ENST00000380205	IFNA8	Coding	Click Me	1	-0.29	164	-21.55	0	1	0	0	439
ENST00000330943	SNX20	Coding	Click Me	1	-0.215	150	-19.72	0	0	1	0	1781
ENST00000617714	PRSS56	Coding	Click Me	1	-0.361	163	-16.75	0	1	0	0	210
ENST00000380191	GDI2	Coding	Click Me	1	-0.147	150	-23.73	0	1	0	0	2568
ENST00000564536	AC092718.3	Coding	Click Me	1	-0.135	140	-13.97	0	0	1	0	468
ENST00000280527	CRIM1	Coding	Click Me	1	-0.166	142	-20.63	0	0	1	0	2434
ENST00000418265	ISY1-RAB43	Coding	Click Me	1	-0.205	148	-20.76	0	0	1	0	3817
ENST00000371946	MKNK1	Coding	Click Me	1	-0.284	161	-21.25	1	0	0	0	1169
ENST00000371945	MKNK1	Coding	Click Me	1	-0.286	161	-21.25	1	0	0	0	1156
ENST00000579512	HIST2H4B	Coding	Click Me	1	-0.205	155	-22.45	0	1	0	0	741
ENST00000508906	BTN3A2	Coding	Click Me	1	-0.175	143	-22.42	0	0	1	0	2558
ENST00000361842	XAF1	Coding	Click Me	2	-0.311	291	-39.76	1	0	1	0	2478
ENST00000642720	SNTG1	Coding	Click Me	1	-0.124	141	-15.1	0	0	1	0	3862
ENST00000554922	EML5	Coding	Click Me	1	-0.135	148	-20.37	0	0	1	0	3580
ENST00000299563	RNF169	Coding	Click Me	1	-0.185	145	-17.46	0	0	1	0	5683
MICT00000232590	CATG00000057494.1	Coding	Click Me	1	-0.298	142	-20.67	0	1	0	0	1000
ENST00000301599	TMEM88	Coding	Click Me	1	-0.307	145	-21.11	1	0	0	0	385
MICT00000198512	CATG00000044530.1	Coding	Click Me	1	-0.246	143	-21	0	1	0	0	1000
FTMT23200007183	CATG00000100722.1	Coding	Click Me	1	-0.3	159	-20.71	0	1	0	0	1000
ENST00000618101	NR4A3	Coding	Click Me	1	-0.125	147	-23.7	0	1	0	0	3024
ENST00000380680	UBL3	Coding	Click Me	1	-0.194	145	-16.57	0	0	1	0	2884
ENST00000368494	NUS1	Coding	Click Me	1	-0.124	148	-17.4	0	0	1	0	3708
ENST00000357077	ANK2	Coding	Click Me	1	-0.145	147	-23.1	0	0	1	0	2269
ENST00000389589	SHOX2	Coding	Click Me	1	-0.17	149	-14.19	0	0	1	0	868
ENST00000641622	OR6Y1	Coding	Click Me	1	-0.138	143	-13.37	0	0	1	0	2578
ENST00000373789	RTKN2	Coding	Click Me	1	-0.184	142	-17.6	0	0	1	0	4822
ENST00000222250	ARRDC2	Coding	Click Me	1	-0.116	147	-20.34	0	1	0	0	1136
ENST00000281928	MED13L	Coding	Click Me	1	-0.205	159	-19.16	0	1	0	0	2690
ENST00000308448	ATAD1	Coding	Click Me	1	-0.271	159	-15.22	0	1	0	0	3175
ENST00000261530	GPATCH2L	Coding	Click Me	1	-0.105	159	-16.56	1	0	0	0	12492
ENCT00000279909	CATG00000058070.1	Coding	Click Me	1	-0.191	152	-30.82	0	1	0	0	1000
ENST00000524892	ARHGAP42	Coding	Click Me	1	-0.209	152	-16.02	0	0	1	0	3136
ENST00000260746	ARL3	Coding	Click Me	1	-0.179	144	-23.73	0	0	1	0	3179
ENST00000334660	CHP1	Coding	Click Me	1	-0.127	145	-18.84	0	0	1	0	2496
ENST00000380534	SAXO1	Coding	Click Me	1	-0.171	147	-15.86	0	0	1	0	394
ENST00000261692	CDK2AP1	Coding	Click Me	1	-0.259	150	-15.31	0	1	0	0	766
ENST00000369838	SH3BGRL2	Coding	Click Me	1	-0.43	161	-19.02	1	0	0	0	4854
ENCT00000477994	CATG00000113827.1	Coding	Click Me	1	-0.276	161	-21.06	1	0	0	0	1000
ENST00000422365	MCMDC2	Coding	Click Me	1	-0.228	170	-19.89	0	1	0	0	2879
ENST00000618040	KCNN3	Coding	Click Me	1	-0.242	140	-15.62	0	1	0	0	10502
ENST00000260184	DDX60L	Coding	Click Me	1	-0.209	141	-19.21	0	0	1	0	1412
ENST00000169551	TIMM21	Coding	Click Me	1	-0.495	157	-16.61	1	0	0	0	489
ENST00000357183	RAET1E	Coding	Click Me	1	-0.258	156	-17.08	0	1	0	0	2630
ENST00000361719	GRM1	Coding	Click Me	1	-0.275	140	-17.97	1	0	0	0	2802
ENST00000379520	YPEL5	Coding	Click Me	1	-0.18	150	-22.24	0	0	1	0	1690
ENST00000440859	CBLL1	Coding	Click Me	1	-0.238	163	-17.71	1	0	0	0	3286
ENST00000264316	TXK	Coding	Click Me	1	-0.135	148	-24.33	0	1	0	0	4254
MICT00000238293	CATG00000063823.1	Coding	Click Me	1	-0.133	156	-26.33	0	1	0	0	1000
ENST00000389120	RNF20	Coding	Click Me	1	-0.119	208	-44	0	1	0	0	5226
ENST00000381938	TMEM156	Coding	Click Me	2	-0.336	280	-37.17	0	0	2	0	1671
ENST00000277942	NPFFR1	Coding	Click Me	1	-0.246	160	-22.28	0	0	1	0	7628
ENST00000356109	ZNF44	Coding	Click Me	1	-0.503	156	-21.33	1	0	0	0	597
ENST00000352133	SLC37A1	Coding	Click Me	1	-0.103	142	-16.72	0	0	1	0	1080
ENST00000379454	ASPH	Coding	Click Me	1	-0.107	155	-16.53	0	0	1	0	2803
MICT00000363210	CATG00000106275.1	Coding	Click Me	1	-0.515	184	-28.89	1	0	0	0	1000
ENST00000328205	LIN9	Coding	Click Me	1	-0.182	141	-18.16	0	0	1	0	1352
ENST00000287156	UBE2L6	Coding	Click Me	1	-0.194	143	-22.11	0	1	0	0	696
ENST00000378494	CAMKMT	Coding	Click Me	1	-0.298	160	-21.01	0	1	0	0	479
ENST00000321442	SFXN1	Coding	Click Me	1	-0.267	154	-28.47	0	1	0	0	3455
ENST00000240185	TARDBP	Coding	Click Me	1	-0.246	157	-24.51	0	1	0	0	3761
MICT00000053341	CATG00000001377.1	Coding	Click Me	1	-0.256	170	-26.36	0	1	0	0	1000
ENST00000306052	LRP8	Coding	Click Me	2	-0.395	302	-33.28	0	2	0	0	4649
MICT00000322707	CATG00000092121.1	Coding	Click Me	1	-0.191	165	-23.75	0	1	0	0	1000
ENST00000545683	HIST2H2BF	Coding	Click Me	1	-0.174	140	-14.27	0	0	1	0	544
ENST00000293777	MED11	Coding	Click Me	1	-0.119	146	-16.48	0	0	1	0	423
ENST00000227638	PANX1	Coding	Click Me	1	-0.133	163	-16.38	0	1	0	0	4738
ENST00000375571	MAPRE1	Coding	Click Me	1	-0.347	151	-16.79	1	0	0	0	1677
ENST00000155858	TRPM5	Coding	Click Me	1	-0.11	155	-28.2	0	0	1	0	422
ENST00000233336	TTL	Coding	Click Me	1	-0.161	152	-19.56	1	0	0	0	12944
ENST00000357525	PLN	Coding	Click Me	1	-0.139	146	-15.89	0	0	1	0	3762
ENST00000282701	BMP3	Coding	Click Me	1	-0.136	147	-17.11	0	0	1	0	4587
ENST00000238823	FAM98A	Coding	Click Me	1	-0.161	140	-12.34	0	0	1	0	1731
ENCT00000484826	CATG00000114901.1	Coding	Click Me	2	-0.711	295	-37.94	1	1	0	0	1000
ENST00000249071	RAC2	Coding	Click Me	1	-0.141	156	-20.07	0	0	1	0	782
ENST00000328550	ZNF571	Coding	Click Me	1	-0.144	142	-16.67	0	0	1	0	1914
ENST00000201647	EPS8L1	Coding	Click Me	1	-0.174	163	-30.08	0	1	0	0	309
ENST00000382179	BRSK2	Coding	Click Me	1	-0.122	150	-23.58	0	1	0	0	1966
ENST00000258930	CIB2	Coding	Click Me	1	-0.341	143	-25.06	1	0	0	0	706
ENST00000448116	SHC1	Coding	Click Me	1	-0.127	148	-20.34	0	0	1	0	1505
ENST00000611870	CNTNAP4	Coding	Click Me	1	-0.17	145	-14.17	0	0	1	0	555
MICT00000232606	CATG00000057495.1	Coding	Click Me	1	-0.269	166	-23.06	0	1	0	0	1000
MICT00000038370	CATG00000117636.1	Coding	Click Me	1	-0.173	154	-33.35	0	1	0	0	1000
ENST00000643399	HK1	Coding	Click Me	1	-0.144	141	-25.74	0	1	0	0	747
ENST00000519807	RPS20	Coding	Click Me	1	-0.178	154	-16.5	0	0	1	0	1313
ENST00000520164	EBF2	Coding	Click Me	1	-0.19	155	-24.94	0	1	0	0	2881
ENST00000340126	SP100	Coding	Click Me	1	-0.107	146	-19.7	0	0	1	0	2678
ENST00000268607	MAP1LC3B	Coding	Click Me	2	-0.321	304	-36.29	0	1	1	0	3202
ENST00000402135	FANCL	Coding	Click Me	1	-0.214	145	-17.71	0	0	1	0	518
ENST00000215906	ASPHD2	Coding	Click Me	1	-0.192	143	-17.12	0	1	0	0	1809
ENST00000261275	FAM189A1	Coding	Click Me	1	-0.116	152	-28.17	0	1	0	0	3087
ENST00000464167	RPL35A	Coding	Click Me	1	-0.199	151	-16.09	0	1	0	0	837
ENST00000394562	SLFN12	Coding	Click Me	1	-0.126	148	-20.13	0	0	1	0	7291
ENST00000256689	SLC38A2	Coding	Click Me	1	-0.113	152	-19.09	0	0	1	0	2941
ENST00000354619	ERO1B	Coding	Click Me	1	-0.147	141	-16.1	0	0	1	0	3417
ENST00000372789	WFDC5	Coding	Click Me	1	-0.21	148	-19.45	0	1	0	0	557
ENST00000372146	GTF3C4	Coding	Click Me	1	-0.166	140	-15.05	0	0	1	0	6010
ENST00000250974	ABHD17A	Coding	Click Me	1	-0.346	152	-16.23	0	1	0	0	224
ENST00000325006	AHCYL2	Coding	Click Me	1	-0.182	144	-20.73	0	0	1	0	3170
ENST00000377524	STAM	Coding	Click Me	1	-0.361	162	-17.09	1	0	0	0	2042
ENST00000370203	TMEM56	Coding	Click Me	1	-0.213	142	-23.17	0	0	1	0	5739
ENST00000265104	DNAH5	Coding	Click Me	1	-0.153	152	-12.24	0	0	1	0	1656
NM_001310135	TTC6	Coding	Click Me	1	-0.32	151	-20.82	0	1	0	0	334
ENST00000310137	RBM14	Coding	Click Me	1	-0.186	141	-16.48	0	0	1	0	3258
ENST00000395386	PHF20L1	Coding	Click Me	1	-0.242	157	-22.59	0	1	0	0	2884
ENCT00000016566	CATG00000032515.1	Coding	Click Me	1	-0.207	154	-24.51	0	1	0	0	1000
ENST00000319420	SHISA2	Coding	Click Me	1	-0.142	152	-14.94	0	0	1	0	2018
ENST00000306917	FEM1B	Coding	Click Me	1	-0.137	152	-15.68	0	0	1	0	4623
MICT00000161230	CATG00000035680.1	Coding	Click Me	1	-0.299	162	-20.71	0	1	0	0	1000
ENST00000506684	WNT8A	Coding	Click Me	1	-0.158	143	-24.68	0	0	1	0	197
MICT00000077885	CATG00000008816.1	Coding	Click Me	1	-0.11	141	-25.87	0	1	0	0	1000
ENST00000262150	CDH19	Coding	Click Me	1	-0.101	149	-15.67	0	1	0	0	3729
ENST00000366647	GNPAT	Coding	Click Me	1	-0.202	141	-14.85	0	0	1	0	431
ENST00000559447	RFX7	Coding	Click Me	1	-0.173	142	-13.14	0	0	1	0	6062
ENST00000308666	ABCD2	Coding	Click Me	1	-0.172	166	-16.25	1	0	0	0	6933
ENST00000323346	SLC17A8	Coding	Click Me	1	-0.462	159	-16.5	1	0	0	0	1900
ENST00000533655	DDIAS	Coding	Click Me	1	-0.243	162	-19.42	0	1	0	0	324
ENST00000479870	TCAF1	Coding	Click Me	1	-0.299	154	-17.35	1	0	0	0	2765
ENST00000261918	SEMA7A	Coding	Click Me	1	-0.266	155	-24.18	1	0	0	0	1335
ENST00000380833	CLCN4	Coding	Click Me	1	-0.162	142	-13.88	0	0	1	0	4076
ENST00000617146	SRCIN1	Coding	Click Me	1	-0.182	147	-14.25	0	0	1	0	3281
ENST00000612423	PLP1	Coding	Click Me	1	-0.141	150	-17.75	0	0	1	0	2018
ENST00000261593	RNF138	Coding	Click Me	1	-0.162	142	-15.62	0	0	1	0	2374
ENST00000335658	DPPA4	Coding	Click Me	1	-0.2	147	-27.07	0	0	1	0	1847
ENST00000644371	ABHD5	Coding	Click Me	1	-0.189	143	-17.82	0	0	1	0	4193
ENST00000265074	NPR3	Coding	Click Me	1	-0.25	153	-22.4	0	1	0	0	5379
ENST00000317243	ZNF554	Coding	Click Me	1	-0.116	152	-17.82	0	1	0	0	3974
ENST00000618457	PRLR	Coding	Click Me	1	-0.224	152	-22.67	0	1	0	0	9389
ENST00000342144	COX8C	Coding	Click Me	1	-0.298	157	-20.82	0	1	0	0	3247
ENST00000300056	PEX11A	Coding	Click Me	1	-0.218	140	-16.56	0	0	1	0	1846
ENST00000368488	CEP85L	Coding	Click Me	1	-0.21	144	-21.03	0	0	1	0	4624
ENST00000224652	ATE1	Coding	Click Me	1	-0.218	146	-16.82	0	0	1	0	3259
ENST00000259400	STX17	Coding	Click Me	1	-0.144	179	-19.93	0	1	0	0	6747
ENST00000394036	HELLS	Coding	Click Me	1	-0.229	156	-16.99	0	1	0	0	5193
ENST00000300182	MS4A6E	Coding	Click Me	1	-0.217	156	-17.05	0	0	1	0	202
ENST00000216373	SOS2	Coding	Click Me	1	-0.172	150	-20.45	0	0	1	0	1223
ENST00000360540	PCMTD1	Coding	Click Me	1	-0.167	150	-15.7	0	0	1	0	2786
ENST00000308197	COQ10A	Coding	Click Me	1	-0.243	156	-25.38	0	1	0	0	647
ENST00000317802	TSPYL6	Coding	Click Me	1	-0.134	148	-25.51	0	0	1	0	1741
ENST00000345060	ADRB3	Coding	Click Me	1	-0.144	140	-20	0	0	1	0	1222
ENST00000414423	WDR26	Coding	Click Me	1	-0.141	143	-18.9	0	0	1	0	4692
ENST00000559717	MAN2A2	Coding	Click Me	1	-0.155	159	-17.29	0	0	1	0	2792
ENST00000369847	PCGF6	Coding	Click Me	1	-0.214	140	-27.99	0	0	1	0	1109
ENST00000367282	GPR37L1	Coding	Click Me	1	-0.336	156	-29.47	1	0	0	0	5036
ENST00000592179	ANKRD29	Coding	Click Me	2	-0.409	293	-36.02	0	1	1	0	2300
ENST00000344423	ZNF395	Coding	Click Me	1	-0.213	144	-19.87	0	1	0	0	3134
ENST00000375026	TMEM225	Coding	Click Me	1	-0.183	144	-15.69	0	0	1	0	212
ENST00000229708	ULBP1	Coding	Click Me	1	-0.141	164	-23.5	0	0	1	0	2367
ENST00000393376	AASS	Coding	Click Me	1	-0.136	156	-19	0	0	1	0	3017
ENST00000370574	ZNHIT6	Coding	Click Me	1	-0.181	157	-18.25	0	1	0	0	1250
ENST00000343702	NTN4	Coding	Click Me	1	-0.106	140	-25.86	0	0	1	0	1279
ENST00000415643	AC090186.1	Coding	Click Me	1	-0.192	143	-16.56	0	0	1	0	472
ENST00000566799	CORO2B	Coding	Click Me	1	-0.33	165	-25.18	1	0	0	0	1829
ENST00000536681	FAR2	Coding	Click Me	1	-0.1	143	-15.72	0	0	1	0	3559
ENST00000612932	SOCS7	Coding	Click Me	1	-0.162	140	-15.64	0	0	1	0	6111
ENST00000380629	BNIP3L	Coding	Click Me	1	-0.156	144	-16.07	0	0	1	0	2722
ENST00000344936	ARHGAP12	Coding	Click Me	1	-0.168	140	-17.75	0	0	1	0	1352
ENST00000436648	GLYR1	Coding	Click Me	1	-0.148	153	-19.68	0	1	0	0	2033
ENST00000402905	CARF	Coding	Click Me	1	-0.154	152	-21.05	0	0	1	0	4641
ENST00000223145	GLCCI1	Coding	Click Me	2	-0.278	287	-37.94	0	0	2	0	2542
ENST00000340437	CPSF7	Coding	Click Me	1	-0.195	141	-13.73	0	0	1	0	2062
ENST00000229955	GPR63	Coding	Click Me	1	-0.205	144	-16.74	0	0	1	0	4350
ENST00000379446	NEDD9	Coding	Click Me	1	-0.195	154	-22.63	0	0	1	0	1864
ENST00000327435	ADI1	Coding	Click Me	1	-0.146	160	-21.79	0	1	0	0	2590
ENST00000397732	ZNF709	Coding	Click Me	1	-0.133	143	-23.02	0	0	1	0	2812
ENST00000270722	PRDM16	Coding	Click Me	1	-0.209	156	-21.23	0	1	0	0	4810
ENST00000297268	COL1A2	Coding	Click Me	1	-0.173	145	-16.44	0	0	1	0	839
ENST00000646441	EFNB2	Coding	Click Me	1	-0.239	150	-17.93	0	0	1	0	3295
MICT00000336584	CATG00000097573.1	Coding	Click Me	1	-0.329	151	-23.41	1	0	0	0	1000
ENST00000373109	SPOCK2	Coding	Click Me	1	-0.246	143	-12.21	0	0	1	0	3726
ENST00000267202	VPS37B	Coding	Click Me	1	-0.245	152	-23.52	1	0	0	0	1788
ENST00000210187	RAB26	Coding	Click Me	1	-0.298	155	-27.98	1	0	0	0	744
ENST00000334056	SPDYA	Coding	Click Me	1	-0.163	145	-16.95	0	0	1	0	670
ENST00000433368	CRISP3	Coding	Click Me	1	-0.17	147	-13.55	0	0	1	0	1328
ENST00000341893	CEP97	Coding	Click Me	1	-0.139	142	-18.79	0	0	1	0	5110
ENST00000286614	MMP16	Coding	Click Me	1	-0.145	157	-16.17	0	1	0	0	9452
ENST00000313367	OSBPL3	Coding	Click Me	1	-0.207	153	-21.32	0	0	1	0	3648
ENST00000369660	UBL4A	Coding	Click Me	2	-0.386	301	-45.15	0	1	1	0	1822
ENST00000374268	FAM110D	Coding	Click Me	1	-0.319	148	-28.32	1	0	0	0	521
ENCT00000461167	CATG00000109844.1	Coding	Click Me	1	-0.188	162	-34.66	0	1	0	0	1000
MICT00000369011	CATG00000107360.1	Coding	Click Me	1	-0.194	160	-29.13	0	1	0	0	1000
ENST00000303965	ARAP2	Coding	Click Me	1	-0.175	145	-20.21	0	0	1	0	1909
ENST00000239223	DUSP1	Coding	Click Me	1	-0.13	142	-20.15	0	0	1	0	1875
ENST00000396396	PGM5	Coding	Click Me	1	-0.164	144	-23.68	0	1	0	0	1405
ENST00000382140	C1QTNF9B	Coding	Click Me	1	-0.512	149	-19.19	1	0	0	0	764
ENST00000382142	MTMR12	Coding	Click Me	1	-0.169	144	-21.1	1	0	0	0	2772
ENST00000267339	ANKRD10	Coding	Click Me	1	-0.109	149	-21.13	0	0	1	0	1097
ENST00000330368	ACTRT3	Coding	Click Me	1	-0.418	142	-18.38	1	0	0	0	3648
ENCT00000178072	CATG00000032376.1	Coding	Click Me	1	-0.193	146	-27.27	0	1	0	0	1000
FTMT25400005236	CATG00000022148.1	Coding	Click Me	1	-0.189	149	-25.64	0	1	0	0	904
ENST00000371763	GLT6D1	Coding	Click Me	1	-0.208	143	-15.64	0	0	1	0	441
ENST00000572705	TRPV1	Coding	Click Me	1	-0.119	140	-19.67	0	0	1	0	1371
ENST00000370360	GLMN	Coding	Click Me	1	-0.224	157	-21.27	0	0	1	0	806
ENST00000263038	PHYH	Coding	Click Me	1	-0.205	147	-16.27	0	0	1	0	501
ENCT00000096266	CATG00000010465.1	Coding	Click Me	1	-0.195	161	-24.36	0	1	0	0	1000
ENST00000357847	AIG1	Coding	Click Me	1	-0.201	157	-25.95	0	1	0	0	3980
ENST00000394555	EFEMP1	Coding	Click Me	1	-0.172	143	-21.76	0	0	1	0	1111
ENST00000321919	GLYR1	Coding	Click Me	1	-0.148	153	-19.68	0	1	0	0	2033
ENST00000358704	ZBTB18	Coding	Click Me	2	-0.281	302	-43.25	0	0	2	0	2108
ENST00000355594	ANKRD35	Coding	Click Me	1	-0.195	150	-24.8	0	0	1	0	249
ENST00000377534	LMO7	Coding	Click Me	1	-0.172	141	-17.3	0	0	1	0	1920
ENST00000382895	NSD2	Coding	Click Me	1	-0.167	144	-16.68	0	0	1	0	3301
ENST00000311180	PDE12	Coding	Click Me	1	-0.221	176	-23.47	0	1	0	0	6840
ENST00000323534	RAP2B	Coding	Click Me	1	-0.131	143	-24.52	0	0	1	0	7379
ENST00000374865	MRPL50	Coding	Click Me	1	-0.251	151	-17.2	1	0	0	0	2835
ENST00000395395	ZNF169	Coding	Click Me	1	-0.29	160	-23.12	0	1	0	0	2613
ENST00000309951	ACO1	Coding	Click Me	1	-0.163	155	-18.98	0	1	0	0	4661
ENST00000299492	PPFIBP2	Coding	Click Me	1	-0.282	157	-16.56	0	1	0	0	538
ENST00000338821	ATP9A	Coding	Click Me	1	-0.239	150	-19.73	0	0	1	0	4697
ENST00000375790	MKX	Coding	Click Me	1	-0.129	144	-15.6	0	0	1	0	2355
ENST00000229395	FGFR1OP2	Coding	Click Me	1	-0.182	140	-14.34	0	0	1	0	1820
HBMT00000023668	CATG00000012032.1	Coding	Click Me	1	-0.144	142	-26.98	0	1	0	0	865
ENST00000264935	CEP72	Coding	Click Me	1	-0.152	152	-21.43	0	1	0	0	3926
ENST00000259963	FAM8A1	Coding	Click Me	1	-0.162	147	-18.45	0	0	1	0	3380
ENST00000367075	EZR	Coding	Click Me	1	-0.371	165	-25.02	1	0	0	0	1166
ENST00000262144	WDR59	Coding	Click Me	2	-0.53	333	-45.43	1	1	0	0	2843
ENST00000341776	JARID2	Coding	Click Me	1	-0.24	150	-19.16	1	0	0	0	1791
ENST00000570836	ALOX15	Coding	Click Me	1	-0.165	146	-17.86	0	0	1	0	2039
ENST00000266269	PATZ1	Coding	Click Me	1	-0.205	158	-23.94	0	1	0	0	1087
ENST00000435030	KIF5C	Coding	Click Me	2	-0.647	299	-33.18	1	0	1	0	3689
ENCT00000278074	CATG00000057491.1	Coding	Click Me	1	-0.185	146	-17.82	0	0	1	0	1000
ENST00000372548	CXorf57	Coding	Click Me	1	-0.174	154	-16.23	0	0	1	0	1185
ENCT00000129527	CATG00000020049.1	Coding	Click Me	1	-0.192	147	-23.26	0	1	0	0	1000
ENST00000593965	AC008964.1	Coding	Click Me	1	-0.24	147	-16.96	0	1	0	0	1485
ENST00000391701	ZNF552	Coding	Click Me	1	-0.168	142	-19.68	0	0	1	0	958
ENST00000367619	SOAT1	Coding	Click Me	1	-0.121	154	-18.1	0	1	0	0	5039
ENST00000360150	ERGIC2	Coding	Click Me	2	-0.519	331	-40.55	1	0	1	0	4311
ENST00000440460	DIXDC1	Coding	Click Me	1	-0.135	141	-23.33	0	0	1	0	3953
NM_001290117	TIMM23B	Coding	Click Me	1	-0.185	148	-20.16	0	0	1	0	1786
ENST00000274093	GLRA3	Coding	Click Me	1	-0.193	142	-18.66	0	0	1	0	6872
HBMT00001543054	CATG00000112803.1	Coding	Click Me	1	-0.217	149	-21.85	0	1	0	0	1000
ENST00000375300	SIK3	Coding	Click Me	1	-0.283	163	-23.24	1	0	0	0	2241
ENST00000407847	PRDM6	Coding	Click Me	1	-0.142	154	-23.15	0	0	1	0	7069
ENST00000339948	ZNF648	Coding	Click Me	1	-0.289	178	-26.5	0	1	0	0	1734
ENST00000368729	S100A7A	Coding	Click Me	1	-0.127	172	-21.57	0	1	0	0	3916
ENST00000260762	EXOC6	Coding	Click Me	1	-0.219	145	-18.75	0	0	1	0	1135
ENST00000367109	DYRK3	Coding	Click Me	1	-0.196	148	-16.94	0	0	1	0	228
ENST00000339764	DNAJB13	Coding	Click Me	1	-0.112	145	-24.83	0	0	1	0	4161
ENST00000546910	CLEC5A	Coding	Click Me	1	-0.255	155	-20.42	0	1	0	0	2747
ENST00000306108	TRMT61B	Coding	Click Me	1	-0.216	152	-18.95	0	0	1	0	378
ENST00000340736	ADGRL1	Coding	Click Me	1	-0.136	146	-15.5	0	0	1	0	3136
ENST00000293373	NCKAP1L	Coding	Click Me	1	-0.143	146	-18.23	0	0	1	0	1257
ENST00000341865	C6orf132	Coding	Click Me	1	-0.266	163	-24.03	1	0	0	0	3455
HBMT00000214267	CATG00000002036.1	Coding	Click Me	2	-0.576	334	-56.21	1	1	0	0	958
ENST00000432566	GOLGA8A	Coding	Click Me	1	-0.289	164	-19.63	0	1	0	0	2340
ENST00000326840	DCBLD2	Coding	Click Me	1	-0.144	143	-33.66	0	0	1	0	3431
ENST00000274364	IQGAP2	Coding	Click Me	1	-0.102	142	-19.89	0	0	1	0	1961
ENST00000361735	METTL13	Coding	Click Me	1	-0.19	140	-21.05	0	0	1	0	961
ENST00000390658	EID2	Coding	Click Me	1	-0.161	158	-23.14	0	0	1	0	1119
ENST00000381154	ARSD	Coding	Click Me	1	-0.182	165	-27.97	1	0	0	0	3301
ENST00000284245	C16orf74	Coding	Click Me	1	-0.319	164	-22.34	0	1	0	0	491
ENST00000371790	SLC16A12	Coding	Click Me	1	-0.208	142	-12.49	0	0	1	0	2765
ENST00000371795	IFIT5	Coding	Click Me	2	-0.258	306	-33.94	0	0	2	0	2354
ENST00000356126	PSMD12	Coding	Click Me	1	-0.146	145	-16.48	0	1	0	0	2928
ENST00000264335	YWHAE	Coding	Click Me	1	-0.101	141	-20.81	0	0	1	0	1175
ENST00000436072	SFRP4	Coding	Click Me	1	-0.166	146	-14.81	0	0	1	0	1546
ENST00000374301	MTFR1L	Coding	Click Me	1	-0.299	162	-23.01	1	0	0	0	912
ENST00000283921	HOXA10	Coding	Click Me	1	-0.167	144	-21.25	0	0	1	0	1308
ENST00000438926	SLC12A3	Coding	Click Me	1	-0.112	161	-26.21	0	1	0	0	2445
ENST00000369983	GBF1	Coding	Click Me	1	-0.188	142	-22.15	0	0	1	0	563
ENST00000399075	C4orf3	Coding	Click Me	1	-0.184	141	-19.24	0	1	0	0	2361
ENST00000536769	UBC	Coding	Click Me	1	-0.106	140	-16.87	0	0	1	0	4592
ENST00000291539	PDE9A	Coding	Click Me	1	-0.385	154	-14.12	0	1	0	0	216
HBMT00000155050	CATG00000116605.1	Coding	Click Me	1	-0.238	147	-19.83	0	1	0	0	789
ENST00000307275	HEXIM2	Coding	Click Me	1	-0.176	155	-21.87	0	0	1	0	888
ENST00000370179	PPDPF	Coding	Click Me	1	-0.329	146	-22.08	1	0	0	0	3472
ENST00000541110	TRERF1	Coding	Click Me	1	-0.115	156	-15.15	0	0	1	0	3426
ENST00000592782	NMT1	Coding	Click Me	1	-0.107	141	-18.32	0	0	1	0	3377
ENST00000379019	GPCPD1	Coding	Click Me	1	-0.159	146	-17.4	0	0	1	0	3227
MICT00000176154	CATG00000039349.1	Coding	Click Me	1	-0.173	147	-21.54	0	0	1	0	1000
ENST00000382080	SGCZ	Coding	Click Me	1	-0.116	142	-22.92	0	0	1	0	579
ENST00000392644	ARMC2	Coding	Click Me	1	-0.209	142	-18.97	0	0	1	0	958
ENST00000374452	SRSF10	Coding	Click Me	1	-0.114	141	-23.94	0	0	1	0	3579
ENST00000282412	PPM1B	Coding	Click Me	1	-0.2	170	-27.13	0	0	1	0	755
ENST00000439458	UNC80	Coding	Click Me	1	-0.201	146	-21.37	0	0	1	0	3705
ENST00000249299	LSM8	Coding	Click Me	1	-0.176	147	-18.37	0	0	1	0	12037
ENST00000602795	NELFCD	Coding	Click Me	1	-0.166	156	-23.88	0	0	1	0	698
ENST00000355377	SYT17	Coding	Click Me	1	-0.496	141	-14.3	1	0	0	0	1255
ENST00000265191	NME5	Coding	Click Me	1	-0.196	158	-19.07	0	0	1	0	509
FTMT22200008031	CATG00000089512.1	Coding	Click Me	1	-0.193	156	-23.38	0	1	0	0	1000
ENST00000311104	GPR151	Coding	Click Me	1	-0.195	164	-21.18	0	0	1	0	1751
ENST00000282032	ARL14EP	Coding	Click Me	1	-0.217	140	-20.53	0	0	1	0	3099
ENST00000313578	AQP11	Coding	Click Me	1	-0.176	159	-27.3	0	0	1	0	979
ENST00000326665	ERICH3	Coding	Click Me	1	-0.129	141	-15.57	0	0	1	0	2347
ENST00000369075	SEC23IP	Coding	Click Me	1	-0.357	152	-23.35	1	0	0	0	4093
ENST00000409699	MEGF11	Coding	Click Me	1	-0.171	141	-22.22	0	0	1	0	2855
ENST00000372236	POLH	Coding	Click Me	1	-0.403	169	-22.33	1	0	0	0	5966
ENST00000396161	ZNF134	Coding	Click Me	1	-0.106	142	-18.28	0	0	1	0	3330
ENST00000403825	IFRD1	Coding	Click Me	1	-0.183	141	-16.56	0	0	1	0	1696
ENST00000370355	SCD	Coding	Click Me	2	-0.394	307	-43.03	0	1	1	0	3901
ENCT00000422686	CATG00000098135.1	Coding	Click Me	1	-0.365	160	-19.43	1	0	0	0	1000
ENST00000297145	BMT2	Coding	Click Me	1	-0.185	143	-16.8	0	0	1	0	2990
ENST00000374692	TMEM38B	Coding	Click Me	1	-0.177	145	-14.65	0	0	1	0	2536
ENST00000580279	GDF10	Coding	Click Me	1	-0.203	165	-28.12	0	1	0	0	755
HBMT00000424838	CATG00000018275.1	Coding	Click Me	1	-0.4	150	-19.91	1	0	0	0	1000
ENST00000311331	ZNF624	Coding	Click Me	1	-0.252	143	-19.88	0	0	1	0	1554
ENST00000377346	PIK3CD	Coding	Click Me	1	-0.201	165	-18.75	0	1	0	0	1873
ENST00000479950	OARD1	Coding	Click Me	1	-0.169	142	-23.12	0	0	1	0	2579
ENST00000358308	ARHGAP19	Coding	Click Me	1	-0.106	157	-20.47	1	0	0	0	3946
ENST00000237696	RARRES1	Coding	Click Me	1	-0.209	145	-15.56	0	0	1	0	786
ENST00000441607	INO80C	Coding	Click Me	1	-0.273	154	-20.91	0	1	0	0	148
ENST00000304685	RGL1	Coding	Click Me	1	-0.154	160	-23.72	0	0	1	0	2259
ENST00000295830	RPL22L1	Coding	Click Me	1	-0.277	157	-21.09	0	1	0	0	1505
uc009xvk.3	ARHGAP19-SLIT1	Coding	Click Me	1	-0.106	157	-20.47	1	0	0	0	3949
ENST00000371804	IFIT1	Coding	Click Me	1	-0.138	147	-15.97	0	0	1	0	2775
ENST00000424459	GPBP1	Coding	Click Me	2	-0.247	300	-43.32	0	1	1	0	5383
ENST00000299155	AMN	Coding	Click Me	1	-0.201	148	-27.53	1	0	0	0	2915
ENST00000304337	TIGD4	Coding	Click Me	1	-0.267	156	-21.59	0	1	0	0	756
ENST00000266014	GLT8D1	Coding	Click Me	1	-0.156	141	-16.42	0	0	1	0	357
ENST00000442510	PTPRC	Coding	Click Me	1	-0.209	142	-20.94	0	0	1	0	1295
ENCT00000203174	CATG00000038838.1	Coding	Click Me	1	-0.13	157	-21.16	0	1	0	0	1000
HBMT00000714401	CATG00000039609.1	Coding	Click Me	1	-0.159	150	-17.62	0	1	0	0	1000
ENST00000295746	CIP2A	Coding	Click Me	1	-0.113	149	-17.58	0	0	1	0	2926
ENST00000446231	SMG1	Coding	Click Me	2	-0.273	296	-41.77	0	1	1	0	4729
ENST00000381813	CYS1	Coding	Click Me	1	-0.14	141	-23.26	0	0	1	0	2079
ENST00000337910	RHOBTB1	Coding	Click Me	1	-0.161	151	-21.89	0	1	0	0	2044
ENST00000380817	SBF1	Coding	Click Me	1	-0.36	159	-27.31	1	0	0	0	2142
ENST00000261973	RBM25	Coding	Click Me	1	-0.121	158	-14.29	1	0	0	0	4098
ENST00000355943	SLC25A46	Coding	Click Me	1	-0.112	154	-19.76	0	0	1	0	3391
ENST00000340635	PDE4D	Coding	Click Me	1	-0.135	147	-16.53	0	0	1	0	5626
ENST00000360128	MAK16	Coding	Click Me	1	-0.226	147	-21.39	0	0	1	0	2644
ENST00000508661	UGT2B7	Coding	Click Me	1	-0.565	169	-26.54	1	0	0	0	496
FTMT21800002851	CATG00000079626.1	Coding	Click Me	1	-0.155	143	-19.16	0	1	0	0	1000
ENST00000264254	PDCL3	Coding	Click Me	1	-0.165	152	-22.04	0	0	1	0	974
ENST00000253144	ZNF331	Coding	Click Me	1	-0.16	142	-19.12	0	0	1	0	2317
NM_054016	SRSF10	Coding	Click Me	1	-0.114	141	-23.94	0	0	1	0	6795
ENST00000507311	SMIM31	Coding	Click Me	1	-0.155	140	-14.7	0	0	1	0	2601
ENST00000274773	TRIM7	Coding	Click Me	1	-0.38	148	-17.71	1	0	0	0	4116
ENST00000246646	KRT38	Coding	Click Me	1	-0.175	142	-15.4	0	1	0	0	1043
ENST00000586534	RAD23A	Coding	Click Me	1	-0.114	151	-18.65	0	1	0	0	921
ENST00000225726	CCDC47	Coding	Click Me	1	-0.125	142	-23.82	0	0	1	0	1631
ENST00000225728	MED31	Coding	Click Me	1	-0.181	145	-19.12	0	0	1	0	1154
MICT00000279148	CATG00000079201.1	Coding	Click Me	1	-0.316	160	-25.5	1	0	0	0	1000
ENST00000334619	CCKBR	Coding	Click Me	1	-0.143	144	-21.48	0	0	1	0	584
ENST00000444842	KCNK2	Coding	Click Me	1	-0.108	152	-23.78	0	0	1	0	1948
ENST00000641693	OR2A5	Coding	Click Me	1	-0.129	155	-20.69	1	0	0	0	7508
ENST00000292211	UBE2Q1	Coding	Click Me	1	-0.199	146	-21.17	0	0	1	0	1894
ENST00000318471	PEX7	Coding	Click Me	1	-0.22	145	-18.29	0	0	1	0	2057
ENST00000347034	CAMKK2	Coding	Click Me	1	-0.193	176	-27.11	0	1	0	0	3026
ENST00000369516	TSPAN2	Coding	Click Me	1	-0.129	145	-19.19	0	0	1	0	2479
ENST00000368029	ITLN2	Coding	Click Me	1	-0.432	145	-18.17	1	0	0	0	115
ENST00000556529	MAP1LC3B2	Coding	Click Me	1	-0.201	147	-14.75	0	0	1	0	128
ENST00000284031	DDAH1	Coding	Click Me	1	-0.238	167	-26.26	0	1	0	0	2967
ENST00000561562	AC009119.2	Coding	Click Me	1	-0.225	140	-13.04	0	0	1	0	197
ENST00000615052	C18orf25	Coding	Click Me	1	-0.164	142	-16.81	0	0	1	0	3873
ENST00000287218	ZFAND3	Coding	Click Me	1	-0.222	165	-25.4	0	1	0	0	2235
ENST00000217086	SALL4	Coding	Click Me	1	-0.19	154	-20.42	0	1	0	0	1935
ENST00000541212	PSMD9	Coding	Click Me	2	-0.369	309	-49.26	0	2	0	0	1986
ENST00000398399	VGLL3	Coding	Click Me	1	-0.103	147	-16.95	0	0	1	0	9055
ENST00000335327	WASF3	Coding	Click Me	1	-0.118	141	-17.38	0	0	1	0	3103
ENST00000398392	CGGBP1	Coding	Click Me	1	-0.161	143	-14.71	0	0	1	0	3461
ENST00000616417	FMN1	Coding	Click Me	1	-0.197	143	-19.6	0	0	1	0	8765
ENST00000253363	RBM39	Coding	Click Me	1	-0.153	147	-30.95	0	1	0	0	1270
ENST00000249861	THAP10	Coding	Click Me	1	-0.241	145	-16.37	0	0	1	0	1126
ENCT00000305670	CATG00000065281.1	Coding	Click Me	1	-0.348	150	-15.24	1	0	0	0	1000
ENST00000352251	PROSER1	Coding	Click Me	1	-0.422	147	-23	1	0	0	0	1500
ENST00000435235	SEPT7	Coding	Click Me	1	-0.175	144	-17.52	0	0	1	0	2826
ENST00000361611	PSMB5	Coding	Click Me	1	-0.118	160	-29.35	0	1	0	0	3467
ENST00000232165	UBE3A	Coding	Click Me	1	-0.141	152	-20.21	0	0	1	0	1960
ENST00000333590	PIGA	Coding	Click Me	1	-0.206	155	-21.35	0	0	1	0	2055
ENST00000306065	ANKRD27	Coding	Click Me	1	-0.208	152	-18.03	0	0	1	0	1144
ENST00000290039	CACHD1	Coding	Click Me	1	-0.174	154	-19.11	0	1	0	0	1497
ENST00000381210	TECRL	Coding	Click Me	1	-0.204	146	-16.3	0	1	0	0	2370
ENST00000379959	IL2RA	Coding	Click Me	1	-0.145	163	-21.25	1	0	0	0	2183
ENST00000341183	MKNK1	Coding	Click Me	1	-0.282	161	-21.25	1	0	0	0	1356
ENST00000305866	VPS50	Coding	Click Me	1	-0.151	141	-17.37	0	0	1	0	2687
ENST00000240651	PYROXD1	Coding	Click Me	2	-0.705	294	-43.03	1	0	1	0	2494
ENST00000445192	PRG4	Coding	Click Me	1	-0.201	148	-15.06	0	0	1	0	784
ENST00000422440	SLC25A12	Coding	Click Me	1	-0.122	142	-15.9	0	0	1	0	3989
ENST00000396976	ZSCAN29	Coding	Click Me	1	-0.289	156	-17.11	0	1	0	0	2901
HBMT00000507967	CATG00000025826.1	Coding	Click Me	1	-0.16	154	-19.35	0	0	1	0	1000
ENST00000408939	TTC30B	Coding	Click Me	1	-0.108	147	-15.99	0	0	1	0	2072
ENST00000408937	FOXP2	Coding	Click Me	1	-0.178	145	-15.24	0	0	1	0	5355
ENST00000230582	PRSS16	Coding	Click Me	1	-0.119	152	-26.41	0	0	1	0	2742
ENST00000557016	ERH	Coding	Click Me	1	-0.209	146	-26.69	0	1	0	0	415
ENST00000398531	KRTAP5-10	Coding	Click Me	1	-0.139	140	-22.69	0	1	0	0	424
HBMT00000708405	CATG00000039203.1	Coding	Click Me	1	-0.156	143	-23.24	0	1	0	0	1000
ENST00000595646	ZNF468	Coding	Click Me	1	-0.221	146	-29.87	0	1	0	0	4886
ENST00000329271	GRPEL2	Coding	Click Me	2	-0.269	283	-36.9	0	0	2	0	3301
ENST00000338625	SLC25A15	Coding	Click Me	1	-0.224	144	-22.31	0	1	0	0	2996
ENST00000392477	NCOA7	Coding	Click Me	2	-0.275	304	-36.77	0	1	1	0	3259
ENST00000354785	FN1	Coding	Click Me	1	-0.419	146	-15.56	1	0	0	0	1101
ENST00000334176	RGS9BP	Coding	Click Me	1	-0.129	147	-23	1	0	0	0	4329
ENST00000298542	FRMD7	Coding	Click Me	1	-0.19	145	-19.25	0	0	1	0	877
ENST00000355413	AGK	Coding	Click Me	2	-0.734	299	-39.55	2	0	0	0	2320
ENST00000238875	LGALSL	Coding	Click Me	1	-0.109	150	-17.93	0	0	1	0	2955
ENST00000075503	STYK1	Coding	Click Me	1	-0.346	158	-19.48	1	0	0	0	1216
ENST00000304231	HOMER2	Coding	Click Me	1	-0.161	144	-19.21	0	0	1	0	732
ENST00000316554	CCDC184	Coding	Click Me	1	-0.141	153	-26.98	0	1	0	0	1219
ENST00000372114	TP53RK	Coding	Click Me	1	-0.166	149	-17.54	0	0	1	0	2388
ENST00000315190	SERTM1	Coding	Click Me	2	-0.333	288	-32.21	0	0	2	0	2437
ENST00000261681	MPP5	Coding	Click Me	2	-0.255	287	-41.91	0	0	2	0	3105
ENST00000541916	FNDC3A	Coding	Click Me	1	-0.193	141	-12.51	0	0	1	0	2383
ENST00000298492	ABRAXAS2	Coding	Click Me	2	-0.236	323	-37.3	1	0	1	0	3813
ENST00000474524	MED12L	Coding	Click Me	1	-0.126	151	-26.21	0	1	0	0	4268
ENST00000222747	TSPAN12	Coding	Click Me	1	-0.158	146	-16.91	0	0	1	0	1272
ENST00000370238	GCLM	Coding	Click Me	1	-0.145	152	-18.72	0	0	1	0	3986
ENST00000298815	ARHGAP42	Coding	Click Me	1	-0.209	152	-16.02	0	0	1	0	2124
ENST00000381440	ITPRIPL2	Coding	Click Me	1	-0.118	163	-20.88	0	1	0	0	5561
ENST00000630424	UBE3A	Coding	Click Me	1	-0.149	152	-20.21	0	0	1	0	1890
ENST00000613675	MRPL45	Coding	Click Me	1	-0.234	146	-18.31	0	0	1	0	623
ENCT00000465331	CATG00000110659.1	Coding	Click Me	1	-0.256	157	-18.13	0	1	0	0	1000
ENST00000308317	GEMIN2	Coding	Click Me	1	-0.169	154	-17.46	0	0	1	0	494
ENST00000409668	TMEM150A	Coding	Click Me	1	-0.169	171	-28.84	0	1	0	0	492
ENST00000537916	FZD3	Coding	Click Me	1	-0.14	144	-15.51	0	0	1	0	11256
ENST00000403662	CSF2RB	Coding	Click Me	1	-0.207	148	-23.13	1	0	0	0	1947
ENST00000396625	COL4A4	Coding	Click Me	1	-0.15	146	-16.07	0	0	1	0	4614
ENST00000341376	NFYA	Coding	Click Me	1	-0.259	162	-21.93	0	1	0	0	4997
ENST00000256497	EDEM1	Coding	Click Me	1	-0.18	161	-24.69	0	0	1	0	4047
ENCT00000395850	CATG00000091080.1	Coding	Click Me	1	-0.182	150	-24.75	0	1	0	0	954
ENST00000398238	NSF	Coding	Click Me	1	-0.102	148	-16.52	0	0	1	0	1641
ENST00000376772	PPP1R11	Coding	Click Me	1	-0.149	144	-16.22	0	0	1	0	1027
ENST00000426595	AC092647.5	Coding	Click Me	1	-0.186	150	-18.67	0	0	1	0	1334
ENST00000336767	BRIX1	Coding	Click Me	1	-0.183	152	-15.32	0	1	0	0	3186
ENST00000323460	SENP5	Coding	Click Me	1	-0.244	154	-20.4	0	1	0	0	4548
ENST00000308031	ZNF471	Coding	Click Me	1	-0.441	169	-23.78	1	0	0	0	4285
ENST00000573315	AC004233.2	Coding	Click Me	1	-0.183	142	-16.26	0	0	1	0	430
ENST00000367455	UCHL5	Coding	Click Me	1	-0.435	156	-18.38	1	0	0	0	4101
ENST00000432997	KCNMB2	Coding	Click Me	1	-0.216	148	-19.04	0	0	1	0	1492
FTMT24400002672	CATG00000002374.1	Coding	Click Me	1	-0.266	149	-16.64	0	1	0	0	1000
ENST00000354952	PLSCR4	Coding	Click Me	1	-0.206	146	-13.32	0	0	1	0	2074
ENST00000333279	ANKRD45	Coding	Click Me	1	-0.146	145	-16.99	0	0	1	0	4117
ENST00000534668	MS4A1	Coding	Click Me	1	-0.156	145	-20.37	0	0	1	0	2292
ENST00000340623	C2orf88	Coding	Click Me	1	-0.288	157	-19.58	1	0	0	0	3336
ENST00000265087	STC2	Coding	Click Me	1	-0.238	145	-18.81	0	1	0	0	3141
ENST00000641196	OR6A2	Coding	Click Me	3	-0.758	459	-52.53	1	1	1	0	2989
ENST00000418390	ELOA	Coding	Click Me	2	-0.394	289	-35.2	0	0	2	0	2486
ENST00000481490	FSBP	Coding	Click Me	1	-0.227	168	-20.83	0	0	1	0	4600
ENST00000357037	CAVIN1	Coding	Click Me	1	-0.143	141	-20.04	0	0	1	0	2238
MICT00000260021	CATG00000067568.1	Coding	Click Me	1	-0.316	149	-28.1	1	0	0	0	1000
ENST00000284136	SEMA3D	Coding	Click Me	1	-0.117	176	-21.8	0	1	0	0	4424
HBMT00000773032	CATG00000043861.1	Coding	Click Me	1	-0.388	144	-19.12	1	0	0	0	1000
ENST00000641069	OR2T29	Coding	Click Me	1	-0.114	140	-26.39	0	0	1	0	1632
ENST00000507166	AC058822.1	Coding	Click Me	1	-0.105	146	-13.05	0	0	1	0	2975
ENST00000310496	RFNG	Coding	Click Me	1	-0.266	167	-22.31	0	1	0	0	2174
ENST00000299853	POLR3E	Coding	Click Me	1	-0.168	146	-20.46	0	0	1	0	1403
ENST00000334828	PGAM1	Coding	Click Me	1	-0.156	149	-19.72	0	0	1	0	1215
ENST00000380486	C2CD2	Coding	Click Me	2	-0.445	319	-40.08	1	1	0	0	4012
ENST00000296657	ANKRD33B	Coding	Click Me	1	-0.215	141	-14.55	0	0	1	0	7703
ENST00000280904	DSC2	Coding	Click Me	1	-0.169	145	-14.19	0	0	1	0	2039
ENST00000306279	ATOH8	Coding	Click Me	1	-0.197	140	-16.25	0	0	1	0	4493
ENST00000267812	MFAP1	Coding	Click Me	1	-0.211	147	-21.94	0	1	0	0	603
ENST00000306270	IBTK	Coding	Click Me	1	-0.239	164	-17.9	0	1	0	0	1442
ENST00000426005	TREML1	Coding	Click Me	1	-0.186	147	-19.2	0	0	1	0	343
ENST00000261520	ICE2	Coding	Click Me	1	-0.151	142	-16.03	0	0	1	0	4025
ENST00000278071	ITPRIP	Coding	Click Me	1	-0.122	164	-19.86	0	1	0	0	4710
ENST00000278070	PPRC1	Coding	Click Me	1	-0.215	153	-25.15	0	0	1	0	304
ENST00000379361	PTCHD1	Coding	Click Me	1	-0.158	163	-23.23	1	0	0	0	10187
ENST00000398016	GRIP1	Coding	Click Me	1	-0.224	145	-18.65	0	0	1	0	1588
ENST00000397764	SMIM30	Coding	Click Me	2	-0.543	294	-42.08	1	0	1	0	1490
ENST00000435564	PDE1A	Coding	Click Me	1	-0.102	145	-20.11	0	0	1	0	3047
MICT00000068912	CATG00000004063.1	Coding	Click Me	1	-0.392	147	-16.71	1	0	0	0	1000
MICT00000227295	CATG00000056202.1	Coding	Click Me	1	-0.268	166	-24.96	0	1	0	0	1000
MICT00000238784	CATG00000059304.1	Coding	Click Me	1	-0.358	154	-16.06	1	0	0	0	1000
ENST00000287585	LHFPL4	Coding	Click Me	1	-0.116	145	-21.86	0	0	1	0	3869
ENST00000508342	NEDD4	Coding	Click Me	1	-0.164	145	-20.43	0	0	1	0	2975
ENST00000296509	MAD2L1	Coding	Click Me	1	-0.162	145	-18.64	0	0	1	0	4528
ENST00000344876	PCDH18	Coding	Click Me	1	-0.129	144	-21.23	0	0	1	0	2111
ENST00000545377	ARHGEF28	Coding	Click Me	1	-0.167	143	-16.72	0	0	1	0	979
ENST00000378567	PRKCZ	Coding	Click Me	1	-0.207	148	-26.32	0	1	0	0	386
ENST00000388822	METTL14	Coding	Click Me	1	-0.238	172	-22.66	1	0	0	0	5227
ENST00000307194	GIMAP1	Coding	Click Me	2	-0.348	312	-46.92	0	0	2	0	3359
ENST00000327773	GAS6	Coding	Click Me	1	-0.247	151	-18.56	0	0	1	0	306
ENST00000543253	GPRASP2	Coding	Click Me	1	-0.197	150	-20.1	0	0	1	0	1293
ENST00000307659	KIAA0232	Coding	Click Me	2	-0.406	299	-31.67	0	0	2	0	3198
ENST00000275162	CLVS2	Coding	Click Me	1	-0.38	143	-20.58	1	0	0	0	9166
ENST00000343060	HOXA1	Coding	Click Me	1	-0.211	151	-16.76	0	0	1	0	1447
ENST00000564138	PLCG2	Coding	Click Me	1	-0.15	149	-15.37	1	0	0	0	4695
ENST00000399120	HLCS	Coding	Click Me	1	-0.119	145	-18.32	0	0	1	0	3054
ENST00000622179	SIRPA	Coding	Click Me	1	-0.112	141	-16.3	0	0	1	0	3024
ENST00000249700	TMOD2	Coding	Click Me	1	-0.161	140	-15.67	0	0	1	0	7914
ENST00000558762	IGF1R	Coding	Click Me	2	-0.637	320	-37.78	1	0	1	0	7087
ENST00000398523	STK32A	Coding	Click Me	1	-0.248	179	-28.53	0	1	0	0	3419
ENST00000396365	LILRA6	Coding	Click Me	1	-0.354	162	-25.42	1	0	0	0	404
ENST00000396368	MARF1	Coding	Click Me	1	-0.104	154	-16.62	0	0	1	0	3139
ENST00000228872	CDKN1B	Coding	Click Me	1	-0.108	144	-15.37	0	0	1	0	1774
MICT00000041036	CATG00000114024.1	Coding	Click Me	1	-0.241	159	-22.43	0	1	0	0	1000
ENST00000261249	TRMT5	Coding	Click Me	1	-0.138	146	-18.78	0	0	1	0	3658
ENST00000377636	TBC1D4	Coding	Click Me	1	-0.125	151	-20.23	0	0	1	0	3306
ENST00000545712	MMAB	Coding	Click Me	1	-0.349	146	-20.4	1	0	0	0	3317
ENST00000392863	SMIM8	Coding	Click Me	1	-0.157	140	-13.76	0	0	1	0	3987
ENST00000375851	S1PR3	Coding	Click Me	1	-0.366	161	-16.25	1	0	0	0	4154
ENST00000322128	TSPYL5	Coding	Click Me	1	-0.214	157	-18.94	0	0	1	0	3105
ENST00000422223	FREM1	Coding	Click Me	2	-0.347	309	-37.7	0	2	0	0	2730
ENST00000393408	CBX1	Coding	Click Me	1	-0.132	150	-17.92	0	0	1	0	1383
ENST00000421177	NSG1	Coding	Click Me	1	-0.139	140	-24.08	0	0	1	0	1623
ENST00000445385	SPATA31D3	Coding	Click Me	1	-0.145	149	-15.6	0	0	1	0	2031
ENST00000395925	GLI3	Coding	Click Me	1	-0.275	164	-20.45	0	1	0	0	3380
ENST00000406360	FOXO3	Coding	Click Me	1	-0.185	146	-17.67	0	0	1	0	4976
ENST00000315367	PLEKHF2	Coding	Click Me	1	-0.138	146	-15.72	0	0	1	0	1960
ENST00000304222	ADORA2B	Coding	Click Me	1	-0.202	141	-15.61	0	0	1	0	554
ENST00000375679	CLCNKB	Coding	Click Me	1	-0.145	141	-20.25	0	0	1	0	410
ENST00000303202	PPDPFL	Coding	Click Me	1	-0.22	144	-13.28	0	0	1	0	1552
ENST00000229238	MRPL51	Coding	Click Me	2	-0.667	298	-41.62	1	1	0	0	2069
ENST00000641840	OR2H2	Coding	Click Me	1	-0.216	146	-26.53	0	1	0	0	1617
ENST00000421351	PERP	Coding	Click Me	1	-0.11	144	-28	0	0	1	0	3824
ENST00000376344	C9orf64	Coding	Click Me	2	-0.584	318	-38.62	1	1	0	0	5152
ENST00000231887	EHHADH	Coding	Click Me	1	-0.185	141	-13.56	0	0	1	0	1602
ENST00000392915	MAP3K19	Coding	Click Me	1	-0.235	154	-19.96	0	1	0	0	771
ENST00000266673	TMEM19	Coding	Click Me	1	-0.181	149	-22.19	0	1	0	0	3064
ENST00000221200	KCTD9	Coding	Click Me	1	-0.193	142	-20.79	0	0	1	0	2404
ENST00000394295	ANXA4	Coding	Click Me	1	-0.135	148	-21.45	0	0	1	0	1603
ENST00000416904	ZNF740	Coding	Click Me	1	-0.158	140	-17.9	0	0	1	0	3311
ENCT00000021054	CATG00000044667.1	Coding	Click Me	1	-0.325	152	-17.01	1	0	0	0	1000
ENST00000395104	ZBTB46	Coding	Click Me	1	-0.125	152	-17.67	0	1	0	0	3262
ENST00000357967	ERI2	Coding	Click Me	1	-0.155	149	-19.68	0	0	1	0	1380
ENST00000607772	CNKSR3	Coding	Click Me	1	-0.126	157	-22.81	0	0	1	0	18850
ENST00000372070	AKR1A1	Coding	Click Me	1	-0.232	173	-24.44	0	1	0	0	95
ENCT00000054505	CATG00000117912.1	Coding	Click Me	1	-0.183	142	-15.05	0	0	1	0	1000
MICT00000166224	CATG00000040068.1	Coding	Click Me	1	-0.158	146	-22.31	0	0	1	0	1000
ENST00000522677	MYBL1	Coding	Click Me	1	-0.218	148	-16.86	0	0	1	0	2522
ENCT00000263588	CATG00000053962.1	Coding	Click Me	1	-0.292	151	-18.19	0	1	0	0	1000
ENST00000261888	PARP16	Coding	Click Me	1	-0.267	146	-16.98	1	0	0	0	1313
ENST00000308086	THAP2	Coding	Click Me	1	-0.162	140	-17.76	0	0	1	0	3540
ENST00000479209	SERP1	Coding	Click Me	1	-0.27	160	-18.2	0	1	0	0	2460
ENST00000314011	ZNF436	Coding	Click Me	1	-0.1	161	-25.06	0	0	1	0	5575
ENST00000361897	NOS1AP	Coding	Click Me	1	-0.124	165	-19.07	1	0	0	0	3008
ENST00000299518	IDH3A	Coding	Click Me	1	-0.16	176	-30.34	0	0	1	0	2944
ENST00000374987	APEX2	Coding	Click Me	1	-0.142	140	-17.4	0	0	1	0	1622
MICT00000250066	CATG00000061721.1	Coding	Click Me	1	-0.203	161	-22.9	0	1	0	0	1000
ENST00000539282	BCAT1	Coding	Click Me	1	-0.206	148	-15.82	0	0	1	0	527
ENST00000259845	PSORS1C2	Coding	Click Me	1	-0.523	150	-22.4	1	0	0	0	417
ENST00000262375	DNAJA3	Coding	Click Me	1	-0.177	170	-16.48	0	1	0	0	1243
ENST00000296088	SNRK	Coding	Click Me	1	-0.17	146	-19.55	0	0	1	0	2581
ENST00000264233	POLQ	Coding	Click Me	1	-0.297	170	-20.69	0	1	0	0	878
ENST00000522781	INSYN2	Coding	Click Me	1	-0.135	153	-26.08	0	1	0	0	2411
ENST00000265322	PECR	Coding	Click Me	1	-0.207	158	-18.94	0	0	1	0	901
ENST00000429979	RUBCNL	Coding	Click Me	1	-0.205	140	-17.49	0	0	1	0	1385
ENST00000467460	PEX5L	Coding	Click Me	1	-0.123	141	-14.25	0	0	1	0	6870
ENST00000308153	H2AFV	Coding	Click Me	1	-0.204	143	-16.15	0	0	1	0	273
NM_001322956	TMEM183A	Coding	Click Me	1	-0.188	140	-16.77	0	0	1	0	1808
ENST00000367021	IRF6	Coding	Click Me	1	-0.196	145	-16.32	0	0	1	0	2797
ENST00000389682	TSN	Coding	Click Me	1	-0.29	144	-22.9	0	1	0	0	2641
ENST00000308488	RSF1	Coding	Click Me	1	-0.196	144	-19.12	0	0	1	0	6921
ENCT00000202062	CATG00000038597.1	Coding	Click Me	1	-0.228	150	-19.44	0	1	0	0	1000
ENST00000389032	STK38L	Coding	Click Me	1	-0.138	149	-16.68	0	0	1	0	3504
ENST00000274353	BHMT	Coding	Click Me	1	-0.488	172	-22.43	1	0	0	0	1174
ENST00000327381	XKR4	Coding	Click Me	1	-0.183	146	-23.69	0	0	1	0	17827
ENST00000610343	ZMYM2	Coding	Click Me	1	-0.224	156	-21.16	0	0	1	0	5814
ENCT00000147713	CATG00000024686.1	Coding	Click Me	1	-0.307	141	-17.1	1	0	0	0	1000
ENST00000296641	F2RL2	Coding	Click Me	1	-0.141	157	-22.89	0	0	1	0	2100
ENST00000373840	RAB14	Coding	Click Me	1	-0.136	142	-20.36	0	0	1	0	3264
ENST00000284273	UBASH3B	Coding	Click Me	1	-0.172	149	-17.87	0	0	1	0	4593
ENST00000381340	ITPR2	Coding	Click Me	1	-0.172	147	-19.42	0	0	1	0	4063
ENST00000381346	RDH11	Coding	Click Me	1	-0.485	165	-18.27	1	0	0	0	1545
ENST00000233969	SLC9A2	Coding	Click Me	1	-0.164	146	-18.18	0	0	1	0	2861
ENST00000260045	THAP12	Coding	Click Me	1	-0.214	145	-22.23	0	0	1	0	997
ENST00000296464	HSPA4L	Coding	Click Me	1	-0.168	180	-36.27	0	0	1	0	7877
ENST00000393892	CNP	Coding	Click Me	1	-0.109	151	-18.44	0	0	1	0	3823
ENST00000371103	LCOR	Coding	Click Me	1	-0.124	149	-18.06	0	0	1	0	8519
ENST00000426016	SOS1	Coding	Click Me	1	-0.145	148	-19.86	0	0	1	0	4428
ENST00000357485	ARID5A	Coding	Click Me	1	-0.379	153	-24.1	1	0	0	0	325
ENST00000397778	PQLC1	Coding	Click Me	1	-0.112	167	-24.49	0	1	0	0	1556
ENST00000399004	GIN1	Coding	Click Me	1	-0.169	143	-17.15	0	0	1	0	1898
FTMT22100038773	CATG00000090933.1	Coding	Click Me	1	-0.114	155	-19.33	0	0	1	0	1000
ENST00000621632	DDX24	Coding	Click Me	1	-0.246	160	-19.1	1	0	0	0	2900
ENCT00000296543	CATG00000062558.1	Coding	Click Me	1	-0.311	176	-29.88	0	1	0	0	1000
ENST00000347606	ZNF334	Coding	Click Me	1	-0.214	163	-13.48	0	0	1	0	1664
ENST00000344862	PUS7L	Coding	Click Me	1	-0.164	141	-13.14	0	0	1	0	11383
ENST00000267485	ARMH4	Coding	Click Me	1	-0.108	158	-27.94	0	0	1	0	3975
MICT00000119455	CATG00000025525.1	Coding	Click Me	1	-0.159	165	-22.94	0	1	0	0	1000
ENST00000396912	RBAK	Coding	Click Me	1	-0.157	149	-16	0	0	1	0	3887
ENST00000510708	DTWD2	Coding	Click Me	1	-0.163	147	-14.27	0	0	1	0	1376
ENST00000374228	SLC46A2	Coding	Click Me	1	-0.132	144	-23.89	0	0	1	0	842
ENST00000399138	ALKBH5	Coding	Click Me	1	-0.101	142	-19.9	0	0	1	0	1558
ENST00000217260	RSPO4	Coding	Click Me	1	-0.13	150	-19.45	0	1	0	0	1905
ENST00000278198	LRRC4C	Coding	Click Me	1	-0.163	151	-18.43	0	0	1	0	1595
ENST00000359467	ZNF33B	Coding	Click Me	2	-0.519	302	-33.15	1	0	1	0	3506
ENST00000242261	TWIST1	Coding	Click Me	1	-0.269	147	-20.69	0	1	0	0	3126
ENST00000332793	SLC22A10	Coding	Click Me	1	-0.17	163	-17.48	0	0	1	0	740
ENST00000595661	ZNF473	Coding	Click Me	1	-0.152	160	-24.53	0	0	1	0	1717
ENST00000333461	STAC2	Coding	Click Me	1	-0.118	160	-25.61	0	1	0	0	1756
ENST00000517956	FBXO32	Coding	Click Me	1	-0.187	151	-24.51	0	0	1	0	5486
ENST00000377990	CEP68	Coding	Click Me	1	-0.211	148	-15.55	0	0	1	0	3374
ENST00000222345	SIPA1L3	Coding	Click Me	1	-0.171	148	-26.69	0	1	0	0	2132
ENST00000493960	FAM208A	Coding	Click Me	1	-0.123	140	-19.05	0	0	1	0	3656
ENST00000375847	DNAJC16	Coding	Click Me	1	-0.225	149	-18.61	0	0	1	0	3556
ENST00000531380	FZD4	Coding	Click Me	1	-0.156	145	-16.73	0	0	1	0	5467
ENST00000396137	JMY	Coding	Click Me	1	-0.168	140	-18.07	0	0	1	0	5613
ENST00000307358	HTRA3	Coding	Click Me	1	-0.214	153	-19	0	0	1	0	981
ENST00000413272	NUGGC	Coding	Click Me	1	-0.124	154	-18.02	0	0	1	0	2340
ENST00000382292	SACS	Coding	Click Me	2	-0.793	326	-38.47	2	0	0	0	1310
ENST00000378895	DHRS13	Coding	Click Me	1	-0.244	144	-23.48	0	1	0	0	660
ENST00000373198	PTPRT	Coding	Click Me	1	-0.14	157	-24.87	0	0	1	0	8127
ENST00000257430	APC	Coding	Click Me	1	-0.184	145	-14.4	0	0	1	0	2113
ENST00000374409	STPG1	Coding	Click Me	1	-0.202	148	-20.56	0	0	1	0	2718
ENST00000375667	CLCNKB	Coding	Click Me	1	-0.147	141	-20.25	0	0	1	0	392
ENST00000308973	TLR10	Coding	Click Me	2	-0.355	290	-38.21	0	0	2	0	916
ENST00000396005	SLC5A12	Coding	Click Me	1	-0.11	153	-16.78	1	0	0	0	5483
ENST00000641833	OR1D2	Coding	Click Me	1	-0.182	147	-16.81	0	0	1	0	3574
ENST00000373448	TTI1	Coding	Click Me	1	-0.308	161	-21.52	0	1	0	0	450
ENST00000226004	DUSP3	Coding	Click Me	1	-0.133	157	-16.72	1	0	0	0	6015
ENST00000219197	CBLN1	Coding	Click Me	1	-0.167	155	-24.52	0	1	0	0	1487
ENST00000424881	ZNF655	Coding	Click Me	1	-0.115	151	-19.86	0	0	1	0	2865
ENST00000315571	LDLRAD3	Coding	Click Me	1	-0.172	145	-13.72	0	1	0	0	2739
ENST00000258301	STX6	Coding	Click Me	1	-0.149	149	-18.47	0	0	1	0	3856
ENST00000338316	ADCY2	Coding	Click Me	1	-0.118	140	-18.36	0	0	1	0	3210
ENST00000446394	HECTD2	Coding	Click Me	1	-0.126	146	-15.58	0	0	1	0	2442
ENST00000256079	IPO8	Coding	Click Me	1	-0.38	158	-16.42	1	0	0	0	1879
ENST00000256078	KRAS	Coding	Click Me	1	-0.16	149	-18.28	0	0	1	0	5127
ENST00000309993	MSL2	Coding	Click Me	1	-0.16	141	-17.27	0	0	1	0	4246
ENST00000319273	TAC1	Coding	Click Me	1	-0.393	154	-23.77	1	0	0	0	552
ENST00000336564	ZNF576	Coding	Click Me	1	-0.224	159	-17.86	0	1	0	0	1942
ENST00000289361	BTN3A1	Coding	Click Me	1	-0.178	143	-22.42	0	0	1	0	1524
ENST00000409080	ITGA6	Coding	Click Me	1	-0.19	170	-22.06	0	1	0	0	2030
ENST00000263967	PIK3CA	Coding	Click Me	1	-0.122	142	-16.18	0	0	1	0	5729
ENST00000273183	STAC	Coding	Click Me	1	-0.149	148	-15.24	0	0	1	0	1718
ENST00000368865	BUB3	Coding	Click Me	1	-0.222	150	-14.25	0	0	1	0	1535
ENST00000396641	LRRC3B	Coding	Click Me	1	-0.201	147	-14.8	0	0	1	0	324
HBMT00000661133	CATG00000035374.1	Coding	Click Me	1	-0.246	155	-20.78	0	1	0	0	1000
ENST00000376673	MBNL2	Coding	Click Me	1	-0.111	171	-25.67	0	0	1	0	2670
ENST00000376718	PRUNE2	Coding	Click Me	2	-0.229	291	-40.52	0	0	2	0	3200
ENST00000262215	ARFGEF1	Coding	Click Me	1	-0.101	150	-23.35	0	0	1	0	2316
ENST00000366523	EFCAB2	Coding	Click Me	1	-0.105	149	-20.47	0	0	1	0	4450
ENCT00000327138	CATG00000071295.1	Coding	Click Me	2	-0.628	327	-49.07	1	1	0	0	1000
ENST00000265245	LSG1	Coding	Click Me	1	-0.162	151	-19.95	0	0	1	0	4565
ENST00000323443	LRRC57	Coding	Click Me	1	-0.195	152	-17.02	0	0	1	0	6263
ENST00000295408	MERTK	Coding	Click Me	1	-0.19	144	-14.24	0	0	1	0	697
ENST00000256103	PMP2	Coding	Click Me	1	-0.102	151	-21.65	0	0	1	0	3072
ENST00000405159	FAM104A	Coding	Click Me	1	-0.209	163	-19.56	0	1	0	0	2176
ENST00000295083	PQLC3	Coding	Click Me	1	-0.185	140	-20.37	0	0	1	0	1046
ENST00000595337	DEDD2	Coding	Click Me	1	-0.176	140	-18.46	0	0	1	0	825
ENST00000618804	FAM13C	Coding	Click Me	1	-0.166	140	-16.51	0	0	1	0	1485
ENST00000315392	PLXDC1	Coding	Click Me	1	-0.108	141	-15.26	1	0	0	0	4537
ENST00000264808	PRDM5	Coding	Click Me	1	-0.21	140	-13.54	0	0	1	0	3198
ENST00000262366	GLIS2	Coding	Click Me	1	-0.226	151	-22.66	0	1	0	0	2073
ENST00000360110	TFRC	Coding	Click Me	1	-0.116	140	-25.03	0	0	1	0	2658
ENST00000452319	GLI2	Coding	Click Me	1	-0.175	149	-23.27	0	1	0	0	1978
ENST00000259455	GABBR2	Coding	Click Me	1	-0.176	140	-21.52	0	1	0	0	2502
ENST00000435765	PSMC2	Coding	Click Me	1	-0.149	143	-15.77	0	0	1	0	1816
ENST00000372479	RBM41	Coding	Click Me	1	-0.206	142	-18.55	0	1	0	0	1224
ENST00000404338	ARHGAP35	Coding	Click Me	2	-0.47	292	-33.23	0	2	0	0	4389
ENST00000372902	TIMM8A	Coding	Click Me	1	-0.144	144	-24.75	0	0	1	0	5043
ENST00000374888	ZXDB	Coding	Click Me	1	-0.158	145	-21.99	0	0	1	0	3017
ENST00000456324	ZNF146	Coding	Click Me	1	-0.146	144	-16.8	0	0	1	0	1452
ENST00000308167	ELF4	Coding	Click Me	1	-0.201	157	-22.25	0	1	0	0	1793
ENST00000288368	PREX2	Coding	Click Me	1	-0.119	140	-12.61	0	0	1	0	5652
ENST00000323040	GPR4	Coding	Click Me	1	-0.171	145	-17.39	0	0	1	0	1014
ENST00000644252	DSE	Coding	Click Me	1	-0.174	140	-19.24	0	0	1	0	7512
ENST00000347077	ZNF546	Coding	Click Me	1	-0.247	156	-18.66	1	0	0	0	5260
ENST00000335953	ZBTB16	Coding	Click Me	1	-0.103	142	-25.85	0	0	1	0	6226
ENST00000380753	AKR1C2	Coding	Click Me	1	-0.158	158	-20.7	0	1	0	0	3804
ENST00000265753	EIF4H	Coding	Click Me	1	-0.163	153	-27.64	0	1	0	0	1793
ENST00000636580	ATP6AP2	Coding	Click Me	1	-0.177	152	-17.67	0	0	1	0	1093
ENST00000641220	OR2T33	Coding	Click Me	1	-0.236	151	-18.7	0	1	0	0	2935
ENST00000423059	THSD7A	Coding	Click Me	1	-0.323	163	-19.02	0	1	0	0	5437
ENST00000292539	PPP1R16A	Coding	Click Me	1	-0.131	163	-25.77	0	1	0	0	218
ENST00000293805	BCL6B	Coding	Click Me	1	-0.121	140	-13.64	0	0	1	0	2026
ENST00000614445	PHB	Coding	Click Me	1	-0.136	144	-22.61	0	1	0	0	943
ENST00000332127	ZC3H11A	Coding	Click Me	1	-0.133	143	-18.05	0	0	1	0	1729
ENST00000296679	WDR41	Coding	Click Me	1	-0.188	148	-18.07	0	1	0	0	5242
ENST00000644072	COL4A3BP	Coding	Click Me	1	-0.112	151	-21.81	0	0	1	0	5715
ENST00000297107	GALNT10	Coding	Click Me	2	-0.557	336	-47.06	2	0	0	0	4012
ENST00000296328	UBXN7	Coding	Click Me	1	-0.102	151	-16.04	0	1	0	0	9023
ENST00000353868	NRF1	Coding	Click Me	1	-0.18	154	-24.33	0	1	0	0	1899
ENST00000641559	OR9A4	Coding	Click Me	1	-0.306	140	-26.82	0	1	0	0	805
ENST00000545955	UTY	Coding	Click Me	1	-0.194	143	-14.12	0	0	1	0	1477
MICT00000088909	CATG00000013723.1	Coding	Click Me	1	-0.158	140	-23.63	0	0	1	0	1000
ENCT00000078969	CATG00000005766.1	Coding	Click Me	1	-0.209	142	-17.55	0	0	1	0	1000
ENST00000375123	FOXE1	Coding	Click Me	1	-0.262	160	-24.39	1	0	0	0	3785
ENST00000260908	SLFN12L	Coding	Click Me	1	-0.138	140	-14.92	0	0	1	0	10922
ENST00000281146	C4orf33	Coding	Click Me	1	-0.106	143	-17.89	0	1	0	0	4849
HBMT00000920938	CATG00000056069.1	Coding	Click Me	1	-0.281	159	-18.8	1	0	0	0	1000
ENST00000457907	OSR2	Coding	Click Me	1	-0.183	142	-17.44	0	0	1	0	403
ENST00000333891	PCLO	Coding	Click Me	1	-0.115	144	-25.57	0	0	1	0	4570
ENST00000447947	GPR89C	Coding	Click Me	1	-0.151	140	-20.52	0	0	1	0	930
ENST00000241502	FYTTD1	Coding	Click Me	1	-0.271	165	-19.62	0	1	0	0	5687
ENST00000296522	HPGD	Coding	Click Me	2	-0.335	303	-41.89	0	0	2	0	2783
ENST00000619375	GAGE1	Coding	Click Me	1	-0.149	147	-15.22	0	0	1	0	2519
ENST00000610745	CYP1B1	Coding	Click Me	1	-0.153	145	-14.79	0	0	1	0	3215
ENST00000396908	PROSER3	Coding	Click Me	1	-0.211	154	-18.23	0	1	0	0	3427
ENST00000233826	KCNJ13	Coding	Click Me	1	-0.139	149	-14.14	0	0	1	0	2389
ENST00000261942	FAF2	Coding	Click Me	1	-0.207	167	-23.02	0	1	0	0	3124
ENST00000610581	SPRY1	Coding	Click Me	1	-0.518	164	-17.99	1	0	0	0	1209
ENST00000588460	MFSD11	Coding	Click Me	1	-0.177	151	-20.95	0	0	1	0	220
ENST00000357749	CHM	Coding	Click Me	1	-0.154	141	-14.81	0	0	1	0	3450
ENST00000344989	SRSF10	Coding	Click Me	1	-0.114	141	-23.94	0	0	1	0	3316
ENST00000537253	NUP153	Coding	Click Me	1	-0.229	152	-23.06	0	0	1	0	1062
ENST00000399107	POLR3G	Coding	Click Me	1	-0.133	147	-18.4	0	0	1	0	2413
ENST00000395348	SLC16A9	Coding	Click Me	1	-0.148	145	-12.92	0	0	1	0	2008
ENST00000354200	TBC1D20	Coding	Click Me	1	-0.305	180	-15.51	1	0	0	0	3109
ENST00000307128	MYOZ2	Coding	Click Me	1	-0.218	140	-14.32	0	0	1	0	2489
ENST00000361337	TOP1	Coding	Click Me	1	-0.221	149	-13.93	0	0	1	0	1190
ENST00000377967	KDM6A	Coding	Click Me	1	-0.187	145	-15.25	0	0	1	0	1370
ENST00000370648	BRS3	Coding	Click Me	1	-0.195	155	-25.58	0	0	1	0	1405
ENST00000355810	ART3	Coding	Click Me	1	-0.215	148	-15.04	0	0	1	0	272
ENST00000326624	ZBTB33	Coding	Click Me	1	-0.14	140	-13.2	0	0	1	0	2965
ENST00000398612	ZNF596	Coding	Click Me	1	-0.174	152	-19.06	0	0	1	0	978
ENST00000339362	NEO1	Coding	Click Me	1	-0.11	140	-14.03	0	0	1	0	2509
ENST00000313640	EPSTI1	Coding	Click Me	1	-0.167	147	-16.73	0	0	1	0	1862
ENST00000418971	COLEC11	Coding	Click Me	1	-0.216	141	-13.48	0	0	1	0	526
ENST00000329713	MEX3B	Coding	Click Me	1	-0.305	152	-16.68	0	1	0	0	1383
ENST00000406697	C1S	Coding	Click Me	1	-0.34	150	-15.93	0	1	0	0	1119
ENST00000399810	C5orf49	Coding	Click Me	1	-0.168	143	-16.93	0	0	1	0	1472
MICT00000186929	CATG00000042228.1	Coding	Click Me	1	-0.27	151	-20.44	0	1	0	0	1000
ENCT00000298060	CATG00000063086.1	Coding	Click Me	1	-0.148	153	-22.51	0	1	0	0	1000
ENST00000584437	RNF43	Coding	Click Me	1	-0.138	142	-18.17	0	0	1	0	1267
ENCT00000130493	CATG00000020281.1	Coding	Click Me	1	-0.215	143	-13.78	0	0	1	0	1000
ENST00000329399	PDLIM1	Coding	Click Me	1	-0.195	141	-24.53	0	0	1	0	357
ENST00000295101	KCNJ3	Coding	Click Me	1	-0.13	143	-18.08	0	0	1	0	4047
ENST00000347613	CLCN3	Coding	Click Me	1	-0.164	141	-19.13	0	0	1	0	3122
ENST00000416109	CD163L1	Coding	Click Me	1	-0.191	159	-19.92	0	0	1	0	192
ENST00000395905	LRRC2	Coding	Click Me	1	-0.126	147	-26.52	0	0	1	0	6539
ENST00000429344	CACTIN	Coding	Click Me	1	-0.188	156	-18.41	0	1	0	0	1294
ENST00000382040	RSAD2	Coding	Click Me	2	-0.298	295	-33.14	0	0	2	0	2297
ENST00000355123	ITSN2	Coding	Click Me	1	-0.22	141	-17.49	0	0	1	0	762
ENST00000283147	BMP6	Coding	Click Me	1	-0.211	159	-25.43	0	1	0	0	1431
ENST00000591806	MUM1	Coding	Click Me	1	-0.112	143	-22.54	0	0	1	0	1855
ENST00000322652	SUZ12	Coding	Click Me	1	-0.311	156	-18.31	1	0	0	0	2042
ENST00000282541	GPD1L	Coding	Click Me	1	-0.15	160	-26.42	0	0	1	0	2805
ENST00000222462	WNT16	Coding	Click Me	1	-0.176	141	-13.38	0	0	1	0	1810
ENST00000375615	LAYN	Coding	Click Me	1	-0.227	152	-16.82	0	0	1	0	502
ENST00000612661	MARCKS	Coding	Click Me	1	-0.501	154	-15.79	1	0	0	0	2888
ENST00000373479	RNF8	Coding	Click Me	1	-0.207	141	-24.08	0	1	0	0	3980
ENST00000289153	PIK3CB	Coding	Click Me	1	-0.135	161	-24.89	0	1	0	0	2690
ENST00000298139	WRN	Coding	Click Me	1	-0.117	157	-18.42	1	0	0	0	3032
ENCT00000143002	CATG00000023380.1	Coding	Click Me	1	-0.262	166	-20.33	0	1	0	0	1000
ENST00000337179	NUDT4	Coding	Click Me	1	-0.106	154	-19.97	0	1	0	0	3869
ENST00000265963	GTF2H1	Coding	Click Me	1	-0.228	158	-21.7	0	1	0	0	1175
ENCT00000271921	CATG00000056197.1	Coding	Click Me	1	-0.166	148	-17.05	0	0	1	0	1000
ENST00000374232	SNX30	Coding	Click Me	1	-0.189	140	-17.85	0	0	1	0	6144
ENST00000400590	ZDHHC20	Coding	Click Me	1	-0.282	156	-14.6	0	1	0	0	4527
ENST00000496455	GMPS	Coding	Click Me	1	-0.136	152	-16.13	0	0	1	0	6334
ENST00000353265	PARD6G	Coding	Click Me	1	-0.134	141	-23.6	0	0	1	0	2539
ENST00000372013	ADIRF	Coding	Click Me	1	-0.221	140	-21.39	0	1	0	0	333
ENST00000505065	CDC42SE2	Coding	Click Me	1	-0.171	143	-23.5	0	1	0	0	3576
ENST00000264968	MGAT4A	Coding	Click Me	1	-0.149	144	-14.49	0	0	1	0	6460
ENST00000083182	APPBP2	Coding	Click Me	1	-0.367	140	-15.05	1	0	0	0	4434
ENST00000298912	CLMN	Coding	Click Me	1	-0.318	156	-16.62	1	0	0	0	9625
ENST00000331334	GLRX5	Coding	Click Me	1	-0.175	155	-21.22	0	0	1	0	593
ENST00000256442	CCNB1	Coding	Click Me	1	-0.394	152	-28.41	1	0	0	0	2896
ENST00000256443	CDK7	Coding	Click Me	2	-0.46	286	-39.81	0	0	2	0	295
ENST00000256441	MRPS36	Coding	Click Me	1	-0.194	145	-12.21	0	0	1	0	933
ENST00000314529	ZNF620	Coding	Click Me	1	-0.185	146	-18.24	0	0	1	0	4592
ENST00000336139	ZNF202	Coding	Click Me	2	-0.217	310	-36.72	0	1	1	0	2072
ENST00000304060	ZNF440	Coding	Click Me	1	-0.199	147	-18.57	0	0	1	0	2970
ENST00000409746	PSTPIP2	Coding	Click Me	1	-0.22	157	-22.56	0	0	1	0	1923
MICT00000091217	CATG00000013949.1	Coding	Click Me	1	-0.19	165	-23.94	0	1	0	0	1000
ENST00000295569	FAM19A4	Coding	Click Me	1	-0.21	150	-20.92	0	1	0	0	1378
ENST00000262424	CRISPLD2	Coding	Click Me	1	-0.26	152	-18.11	1	0	0	0	13522
ENST00000481138	ZNF782	Coding	Click Me	1	-0.177	145	-18.23	0	0	1	0	1463
ENST00000239151	HOXB5	Coding	Click Me	1	-0.266	149	-21.22	0	1	0	0	952
ENST00000262644	IMPAD1	Coding	Click Me	1	-0.164	141	-16.76	0	0	1	0	5864
ENST00000251900	SCML2	Coding	Click Me	1	-0.151	140	-15.63	0	0	1	0	1938
ENST00000223500	CHMP5	Coding	Click Me	1	-0.223	157	-23.89	0	1	0	0	1210
ENST00000269197	ASXL3	Coding	Click Me	1	-0.431	161	-19.76	1	0	0	0	4597
MICT00000015919	CATG00000009743.1	Coding	Click Me	1	-0.439	150	-16.67	1	0	0	0	1000
ENST00000342694	NPR2	Coding	Click Me	1	-0.185	153	-14.59	0	0	1	0	287
ENST00000465503	STIM2	Coding	Click Me	1	-0.214	156	-29.2	0	0	1	0	970
MICT00000164176	CATG00000036588.1	Coding	Click Me	1	-0.486	163	-18.76	1	0	0	0	1000
ENST00000260116	TTPA	Coding	Click Me	1	-0.147	164	-20.92	0	1	0	0	2856
ENST00000161006	PRSS22	Coding	Click Me	1	-0.13	145	-26.2	0	1	0	0	366
ENST00000265769	ADAM28	Coding	Click Me	1	-0.145	159	-18.8	0	0	1	0	4614
ENST00000476071	NSFL1C	Coding	Click Me	1	-0.223	163	-23.49	0	1	0	0	1587
ENST00000318636	CA5B	Coding	Click Me	1	-0.111	176	-27.24	1	0	0	0	4961
FTMT23600008736	CATG00000107338.1	Coding	Click Me	1	-0.432	151	-19.63	1	0	0	0	1000
ENST00000305046	ADH1B	Coding	Click Me	1	-0.173	147	-17.23	0	0	1	0	2876
ENST00000321437	RAB8B	Coding	Click Me	1	-0.111	141	-19.19	0	1	0	0	4163
ENST00000641149	OR2B11	Coding	Click Me	1	-0.127	159	-22.89	0	0	1	0	1911
ENST00000296849	NKD2	Coding	Click Me	1	-0.13	144	-21.44	0	0	1	0	570
ENST00000343255	SRSF10	Coding	Click Me	1	-0.114	141	-23.94	0	0	1	0	6795
ENST00000342308	TMEM230	Coding	Click Me	1	-0.162	147	-17.07	0	0	1	0	951
ENST00000509578	COX7C	Coding	Click Me	1	-0.121	159	-25.3	0	1	0	0	2466
ENST00000545947	DAG1	Coding	Click Me	1	-0.158	147	-23.71	0	0	1	0	2419
ENST00000404459	LIPN	Coding	Click Me	1	-0.142	163	-20.44	0	0	1	0	1915
ENST00000318528	ERICH5	Coding	Click Me	1	-0.173	150	-16.22	0	0	1	0	1377
ENST00000641490	OR51A7	Coding	Click Me	2	-0.388	300	-35.44	0	0	2	0	1154
ENST00000281156	KHDRBS2	Coding	Click Me	1	-0.235	154	-19.19	0	0	1	0	1003
ENST00000261195	GYS2	Coding	Click Me	1	-0.425	151	-17.51	1	0	0	0	765
ENST00000301365	TRPV3	Coding	Click Me	1	-0.346	173	-19.77	1	0	0	0	3416
ENST00000381525	E2F6	Coding	Click Me	1	-0.317	152	-25.14	1	0	0	0	2102
ENST00000393077	VTI1A	Coding	Click Me	1	-0.194	155	-18.83	1	0	0	0	4098
ENST00000644685	RIPOR2	Coding	Click Me	1	-0.101	150	-18.75	0	0	1	0	2092
ENST00000284509	ATP8B4	Coding	Click Me	1	-0.14	148	-23.86	0	0	1	0	1956
ENST00000295304	CHAC2	Coding	Click Me	1	-0.22	141	-16.96	0	0	1	0	786
ENST00000411651	SUMO3	Coding	Click Me	1	-0.159	142	-14.62	0	0	1	0	1334
ENST00000619363	AC007906.2	Coding	Click Me	1	-0.145	153	-21.01	0	0	1	0	1255
ENST00000369681	CYB5R4	Coding	Click Me	1	-0.161	145	-17.31	0	0	1	0	7546
ENST00000396934	BTN3A2	Coding	Click Me	1	-0.175	143	-22.42	0	0	1	0	2558
MICT00000219633	CATG00000053533.1	Coding	Click Me	1	-0.121	142	-25.34	0	1	0	0	1000
ENST00000458174	LMNTD1	Coding	Click Me	1	-0.199	148	-21.12	0	0	1	0	202
ENST00000618562	VEGFC	Coding	Click Me	1	-0.209	148	-16.81	0	0	1	0	388
ENST00000620676	VPS13D	Coding	Click Me	2	-0.318	286	-43.54	0	0	2	0	3021
ENST00000358755	FZD6	Coding	Click Me	1	-0.175	141	-20.15	0	0	1	0	1357
ENST00000302182	UBB	Coding	Click Me	1	-0.196	165	-23.67	0	1	0	0	2359
ENST00000358752	FUT4	Coding	Click Me	1	-0.208	140	-12.22	0	0	1	0	4172
ENST00000359332	KLHDC1	Coding	Click Me	1	-0.206	141	-16.69	0	0	1	0	1380
ENST00000622746	SOCS2	Coding	Click Me	1	-0.135	151	-19.44	0	0	1	0	1565
ENST00000623998	FP565260.6	Coding	Click Me	1	-0.165	147	-18.37	0	0	1	0	3013
ENST00000370096	COL11A1	Coding	Click Me	1	-0.141	151	-17.31	0	0	1	0	1552
ENST00000595607	ZNF114	Coding	Click Me	1	-0.257	149	-20.59	0	1	0	0	730
ENST00000519065	HDAC2	Coding	Click Me	1	-0.106	155	-23.12	0	0	1	0	8030
ENST00000297316	SOX17	Coding	Click Me	1	-0.135	147	-16.15	0	0	1	0	2303
ENST00000377603	POLR3F	Coding	Click Me	1	-0.162	160	-17.47	0	1	0	0	2501
ENST00000157812	PSMC4	Coding	Click Me	2	-0.377	336	-54.36	1	0	1	0	2441
ENST00000465271	CNIH4	Coding	Click Me	1	-0.178	141	-14.23	0	0	1	0	4150
ENST00000449726	PLEKHA8	Coding	Click Me	1	-0.117	162	-19.05	1	0	0	0	5876
ENST00000307378	SLCO1A2	Coding	Click Me	1	-0.33	164	-20.62	1	0	0	0	4948
ENST00000611884	RSRC1	Coding	Click Me	1	-0.241	148	-18.5	0	0	1	0	559
ENST00000313899	HNRNPD	Coding	Click Me	1	-0.132	156	-22.04	0	0	1	0	1688
ENST00000303052	CSNK1G1	Coding	Click Me	1	-0.115	140	-12.21	0	0	1	0	6414
ENST00000613488	SIK1B	Coding	Click Me	1	-0.156	174	-32.81	0	1	0	0	2218
ENST00000290524	RFX5	Coding	Click Me	1	-0.322	150	-19.49	1	0	0	0	1546
ENST00000231948	CRBN	Coding	Click Me	1	-0.139	143	-18.68	0	0	1	0	2375
ENST00000376958	GPR180	Coding	Click Me	1	-0.12	140	-17.03	0	0	1	0	7587
MICT00000298396	CATG00000083045.1	Coding	Click Me	1	-0.383	146	-19.04	1	0	0	0	1000
ENST00000322886	E2F7	Coding	Click Me	2	-0.259	305	-41.92	0	1	1	0	2769
ENST00000344337	KPNA1	Coding	Click Me	1	-0.399	157	-17.65	1	0	0	0	5084
ENST00000371733	EPS15	Coding	Click Me	1	-0.121	154	-20.97	0	0	1	0	2437
ENST00000378719	SEPT8	Coding	Click Me	1	-0.202	155	-23.66	0	1	0	0	1199
ENST00000371410	NKAP	Coding	Click Me	1	-0.185	178	-31.26	0	0	1	0	4549
ENST00000276689	NDUFB9	Coding	Click Me	1	-0.155	142	-18.34	0	0	1	0	1512
ENCT00000405840	CATG00000094142.1	Coding	Click Me	1	-0.17	142	-23.71	0	1	0	0	1000
ENST00000228434	CD69	Coding	Click Me	1	-0.188	144	-21.95	0	0	1	0	995
ENST00000304478	MRM3	Coding	Click Me	1	-0.178	148	-31.89	0	0	1	0	3724
ENST00000639955	NECAP1	Coding	Click Me	1	-0.209	147	-14.89	0	0	1	0	1769
ENST00000372398	NCS1	Coding	Click Me	1	-0.144	146	-18.78	0	0	1	0	4332
ENST00000336294	TMEM39B	Coding	Click Me	1	-0.208	154	-16.63	0	0	1	0	188
ENST00000455537	KIF5A	Coding	Click Me	1	-0.105	148	-18.33	0	0	1	0	2451
ENST00000282849	ADAMTS18	Coding	Click Me	1	-0.243	142	-14.38	0	0	1	0	1828
ENST00000610020	RPAP2	Coding	Click Me	1	-0.116	142	-16.61	0	0	1	0	15046
ENST00000314607	ZMYM4	Coding	Click Me	1	-0.178	147	-14.33	0	0	1	0	3535
ENST00000368885	AMD1	Coding	Click Me	1	-0.1	150	-27.26	0	0	1	0	5275
ENST00000368886	IKZF5	Coding	Click Me	1	-0.134	143	-18.09	0	0	1	0	2974
MICT00000258482	CATG00000063531.1	Coding	Click Me	1	-0.185	141	-14.93	0	0	1	0	1000
MICT00000217853	CATG00000053260.1	Coding	Click Me	1	-0.188	152	-20.55	0	1	0	0	1000
ENST00000352983	RPL7	Coding	Click Me	1	-0.185	149	-20.11	0	0	1	0	739
ENST00000362003	PCGF3	Coding	Click Me	1	-0.158	141	-17.02	0	0	1	0	4561
ENST00000641960	OR2J3	Coding	Click Me	2	-0.338	298	-35.19	1	0	1	0	1944
ENST00000294952	PPP1R21	Coding	Click Me	1	-0.19	155	-19.28	0	0	1	0	642
ENST00000613122	CTDP1	Coding	Click Me	1	-0.222	141	-21.95	0	0	1	0	2833
ENST00000394319	LHX6	Coding	Click Me	1	-0.189	168	-20.86	0	0	1	0	2181
ENST00000342972	MAGEH1	Coding	Click Me	1	-0.205	146	-17.88	0	0	1	0	534
ENST00000224140	SETX	Coding	Click Me	1	-0.184	144	-25.39	0	0	1	0	2888
ENST00000251496	NCAPG	Coding	Click Me	1	-0.184	158	-20.99	0	0	1	0	1597
ENST00000642125	OR52A5	Coding	Click Me	2	-0.308	299	-33	0	1	1	0	2916
HBMT00000725778	CATG00000040120.1	Coding	Click Me	1	-0.21	156	-25.61	0	1	0	0	1000
MICT00000005735	CATG00000063141.1	Coding	Click Me	1	-0.151	156	-25.58	0	1	0	0	773
ENST00000248248	MON1B	Coding	Click Me	1	-0.12	144	-17.32	0	1	0	0	4097
ENST00000447857	CCDC155	Coding	Click Me	1	-0.265	150	-19.3	0	1	0	0	489
ENST00000620116	ZNF501	Coding	Click Me	1	-0.176	157	-15.89	0	1	0	0	1846
ENST00000397843	ARHGEF12	Coding	Click Me	1	-0.256	146	-18.09	0	1	0	0	4859
ENST00000356537	CCDC25	Coding	Click Me	1	-0.144	144	-16.8	0	0	1	0	2900
ENST00000256544	KATNBL1	Coding	Click Me	1	-0.117	166	-27.5	0	0	1	0	4104
ENST00000243056	HOXC13	Coding	Click Me	1	-0.221	166	-22.67	0	1	0	0	1288
ENST00000644876	DDX3X	Coding	Click Me	1	-0.114	154	-22.5	0	1	0	0	3949
ENCT00000319973	CATG00000068853.1	Coding	Click Me	1	-0.238	151	-18.87	0	1	0	0	1000
ENST00000367012	SERTAD4	Coding	Click Me	1	-0.443	167	-16.46	1	0	0	0	4518
ENCT00000145796	CATG00000024256.1	Coding	Click Me	1	-0.399	162	-25.05	1	0	0	0	1000
ENST00000299413	TRIM44	Coding	Click Me	1	-0.138	152	-18.74	0	1	0	0	11628
ENST00000366543	CEP170	Coding	Click Me	1	-0.221	147	-17.4	0	1	0	0	2021
ENST00000366542	CEP170	Coding	Click Me	1	-0.221	147	-17.4	0	1	0	0	2026
ENST00000335793	CDC42EP4	Coding	Click Me	1	-0.1	146	-17.23	0	0	1	0	4085
ENST00000436302	AGBL3	Coding	Click Me	2	-0.402	283	-27.3	0	0	2	0	517
ENST00000367941	STX7	Coding	Click Me	1	-0.152	148	-16.42	1	0	0	0	14891
ENST00000360264	CUX1	Coding	Click Me	2	-0.326	296	-31.57	0	2	0	0	9191
ENST00000318607	PABPC1	Coding	Click Me	1	-0.241	151	-18.56	0	0	1	0	3473
ENST00000380733	PSIP1	Coding	Click Me	1	-0.192	145	-16.79	0	0	1	0	1454
ENST00000577830	CUEDC1	Coding	Click Me	1	-0.134	164	-20.98	0	0	1	0	2047
FTMT24000002144	CATG00000111535.1	Coding	Click Me	1	-0.149	146	-18.39	0	0	1	0	1000
ENST00000327355	FAM174B	Coding	Click Me	1	-0.152	141	-19.38	0	0	1	0	2013
ENST00000344327	TRPC6	Coding	Click Me	1	-0.227	154	-20.24	0	0	1	0	1391
ENST00000339834	BORCS7	Coding	Click Me	1	-0.206	140	-17.81	0	0	1	0	2037
ENST00000368655	GATAD2B	Coding	Click Me	1	-0.276	166	-19.17	0	1	0	0	5452
ENST00000341935	CCR6	Coding	Click Me	1	-0.162	152	-19.14	0	0	1	0	2341
ENST00000361228	RASSF9	Coding	Click Me	1	-0.155	140	-20.76	0	0	1	0	3971
ENST00000339659	DYRK1A	Coding	Click Me	1	-0.129	148	-18.89	0	1	0	0	4919
ENST00000339656	ZNF587	Coding	Click Me	1	-0.179	143	-21.74	0	0	1	0	5051
ENST00000405846	GPR12	Coding	Click Me	1	-0.208	147	-18.59	0	0	1	0	3621
ENST00000305231	UGT2B7	Coding	Click Me	1	-0.556	169	-26.54	1	0	0	0	251
ENST00000264399	PRKG2	Coding	Click Me	1	-0.201	143	-22.4	0	0	1	0	2338
ENST00000330387	CREB3L2	Coding	Click Me	1	-0.315	153	-15.86	1	0	0	0	5497
ENST00000375147	NCBP1	Coding	Click Me	1	-0.189	144	-14.99	0	0	1	0	2549
ENST00000324774	CAMKK2	Coding	Click Me	1	-0.193	176	-27.11	0	1	0	0	3002
FTMT24000007118	CATG00000116804.1	Coding	Click Me	1	-0.49	163	-19.25	1	0	0	0	1000
ENST00000389532	CAMSAP1	Coding	Click Me	1	-0.308	146	-18.62	1	0	0	0	2822
ENST00000636672	PRRT1B	Coding	Click Me	1	-0.366	156	-22.06	1	0	0	0	418
ENST00000297632	TMEM65	Coding	Click Me	1	-0.208	159	-21.28	0	0	1	0	7919
ENST00000418331	PTPRJ	Coding	Click Me	1	-0.135	143	-17.54	0	0	1	0	3480
ENCT00000108993	CATG00000013843.1	Coding	Click Me	1	-0.159	142	-22.99	0	0	1	0	1000
ENST00000225792	DDX5	Coding	Click Me	1	-0.184	152	-26.06	0	0	1	0	1672
ENST00000348513	SMARCE1	Coding	Click Me	1	-0.131	149	-19.61	0	0	1	0	3824
HBMT00001543751	CATG00000112865.1	Coding	Click Me	1	-0.17	157	-26.36	0	1	0	0	1000
ENST00000369329	MAP3K7	Coding	Click Me	1	-0.214	188	-30.13	0	1	0	0	2928
ENST00000583509	ACP6	Coding	Click Me	1	-0.423	150	-17.2	1	0	0	0	5188
ENST00000357721	ETFBKMT	Coding	Click Me	1	-0.212	157	-22.78	0	0	1	0	5124
ENST00000547754	GAS2L3	Coding	Click Me	1	-0.17	150	-15.59	0	0	1	0	3396
ENST00000358746	TTC37	Coding	Click Me	1	-0.165	143	-23.25	0	0	1	0	4032
ENST00000537505	RABEP1	Coding	Click Me	1	-0.116	141	-18.72	0	0	1	0	2589
ENST00000620105	C18orf54	Coding	Click Me	1	-0.122	147	-16.8	0	0	1	0	3789
ENST00000307102	MAP2K1	Coding	Click Me	1	-0.138	146	-16.14	0	0	1	0	1697
ENST00000368921	MLLT11	Coding	Click Me	1	-0.178	141	-18.56	0	0	1	0	1000
ENST00000260653	SIX3	Coding	Click Me	1	-0.144	141	-25.67	0	0	1	0	1317
ENST00000237281	FBXO30	Coding	Click Me	1	-0.113	144	-14.02	0	0	1	0	6606
ENST00000545289	ZNF286B	Coding	Click Me	1	-0.109	159	-22.66	1	0	0	0	3508
ENST00000393667	GOLGB1	Coding	Click Me	1	-0.216	154	-16.31	0	1	0	0	1277
ENST00000375898	ABHD13	Coding	Click Me	1	-0.178	146	-17.28	0	0	1	0	4105
ENST00000374762	NIPSNAP3B	Coding	Click Me	1	-0.17	146	-18.68	0	0	1	0	937
MICT00000029505	CATG00000033287.1	Coding	Click Me	1	-0.223	164	-17.39	0	1	0	0	1000
ENST00000374767	NIPSNAP3A	Coding	Click Me	1	-0.182	153	-19.86	0	0	1	0	791
ENST00000373382	VPS26A	Coding	Click Me	1	-0.312	143	-21.68	1	0	0	0	1631
ENST00000373387	GARNL3	Coding	Click Me	1	-0.23	145	-15.34	0	0	1	0	406
ENST00000398411	CST3	Coding	Click Me	1	-0.124	154	-17.73	0	0	1	0	2762
ENST00000392432	TMEM44	Coding	Click Me	1	-0.172	145	-19.9	0	0	1	0	4050
ENST00000376945	SOX21	Coding	Click Me	1	-0.207	140	-12.7	0	0	1	0	1594
ENST00000240123	SORBS3	Coding	Click Me	1	-0.143	144	-22.46	0	0	1	0	1060
ENST00000290246	ELMO2	Coding	Click Me	1	-0.148	151	-16.53	0	1	0	0	1326
ENST00000344300	C15orf48	Coding	Click Me	1	-0.167	141	-19.97	0	1	0	0	433
ENST00000633222	KCNA2	Coding	Click Me	1	-0.298	157	-18.8	1	0	0	0	9703
ENST00000355528	TBCD	Coding	Click Me	1	-0.32	141	-26.98	0	1	0	0	723
ENST00000228928	OAS3	Coding	Click Me	2	-0.441	303	-45.76	1	0	1	0	3276
ENST00000282146	KCNK13	Coding	Click Me	1	-0.248	157	-19.59	0	0	1	0	854
ENST00000233668	DOK1	Coding	Click Me	1	-0.181	143	-18.83	0	0	1	0	757
ENST00000382247	DCAF16	Coding	Click Me	1	-0.111	145	-17.66	0	0	1	0	2836
ENST00000602390	COMMD3-BMI1	Coding	Click Me	2	-0.423	295	-32.76	0	1	1	0	2090
ENST00000447404	STRBP	Coding	Click Me	1	-0.204	147	-18.29	0	0	1	0	4329
ENST00000641801	SCYGR4	Coding	Click Me	1	-0.174	142	-14.56	0	0	1	0	840
ENST00000283632	RMND5A	Coding	Click Me	3	-0.546	467	-54.5	0	2	1	0	4637
ENST00000298440	OXGR1	Coding	Click Me	1	-0.268	154	-20.43	0	1	0	0	1033
ENST00000370282	TMED5	Coding	Click Me	1	-0.104	148	-21.02	0	0	1	0	4928
ENST00000414835	HSD17B4	Coding	Click Me	1	-0.225	142	-21.25	0	0	1	0	338
ENST00000376547	STK24	Coding	Click Me	1	-0.217	163	-20.99	0	1	0	0	1014
ENST00000570440	DEXI	Coding	Click Me	1	-0.119	156	-19.89	0	0	1	0	5111
ENST00000392485	SRSF2	Coding	Click Me	1	-0.158	147	-14.16	0	0	1	0	2312
ENST00000361360	POU3F3	Coding	Click Me	1	-0.182	144	-20.32	0	1	0	0	4145
ENST00000394419	ACTN1	Coding	Click Me	1	-0.183	140	-14.34	0	0	1	0	536
HBMT00000734922	CATG00000040787.1	Coding	Click Me	1	-0.314	166	-29.7	1	0	0	0	1000
ENST00000299642	CLEC3A	Coding	Click Me	1	-0.256	151	-19.01	0	1	0	0	1265
ENST00000338694	TEKT1	Coding	Click Me	1	-0.283	144	-18.89	0	1	0	0	2034
ENST00000306999	ANKMY2	Coding	Click Me	1	-0.206	146	-21.79	0	0	1	0	985
ENST00000372037	BMPR1A	Coding	Click Me	1	-0.133	161	-16.38	0	1	0	0	9119
ENST00000250863	DAZL	Coding	Click Me	1	-0.223	152	-14.98	0	0	1	0	1868
ENST00000258198	DYNC1LI2	Coding	Click Me	1	-0.108	161	-17.45	0	1	0	0	4526
ENST00000355619	FBXL3	Coding	Click Me	1	-0.18	143	-14.96	0	0	1	0	5051
ENST00000220429	GABPB1	Coding	Click Me	1	-0.421	154	-17.34	1	0	0	0	1369
ENST00000314727	SAMD12	Coding	Click Me	1	-0.176	151	-17.15	0	0	1	0	1429
ENST00000263754	KAT2B	Coding	Click Me	1	-0.125	150	-22.42	0	0	1	0	1879
ENST00000228438	CLEC2B	Coding	Click Me	1	-0.169	145	-15.73	0	0	1	0	946
ENST00000204726	GOLGA3	Coding	Click Me	1	-0.199	165	-23.54	1	0	0	0	4196
ENST00000521508	ALG11	Coding	Click Me	2	-0.334	290	-37.02	0	0	2	0	1074
ENST00000366794	PARP1	Coding	Click Me	1	-0.16	150	-22.21	0	0	1	0	769
ENST00000585916	PIAS2	Coding	Click Me	1	-0.17	142	-18.39	0	0	1	0	7278
ENST00000645189	GJB2	Coding	Click Me	1	-0.184	140	-27.2	0	1	0	0	1431
ENST00000574788	USP6	Coding	Click Me	1	-0.461	147	-16.66	1	0	0	0	2013
ENST00000642111	OR8A1	Coding	Click Me	1	-0.162	148	-26.36	0	0	1	0	92
ENST00000372728	BEX1	Coding	Click Me	1	-0.281	158	-26.84	0	1	0	0	255
ENST00000264834	KLF1	Coding	Click Me	1	-0.348	157	-19.75	1	0	0	0	462
ENST00000265362	SEMA3A	Coding	Click Me	1	-0.191	156	-19.01	0	0	1	0	6416
HBMT00000776583	CATG00000044527.1	Coding	Click Me	1	-0.387	173	-25.51	1	0	0	0	1000
ENST00000372629	TCEAL4	Coding	Click Me	1	-0.212	146	-23.34	0	0	1	0	195
ENST00000372628	TCEAL3	Coding	Click Me	1	-0.191	144	-16.23	0	0	1	0	260
ENST00000366953	SLC22A2	Coding	Click Me	1	-0.167	147	-29.21	0	0	1	0	2217
ENST00000372621	CTPS1	Coding	Click Me	1	-0.265	146	-14.48	0	1	0	0	917
ENST00000641015	OR8D1	Coding	Click Me	1	-0.184	141	-18.52	0	0	1	0	7009
ENST00000223795	TNFSF8	Coding	Click Me	1	-0.132	162	-16	0	0	1	0	4571
ENST00000323037	ZNRF2	Coding	Click Me	1	-0.203	143	-14.57	0	0	1	0	5214
ENST00000337174	CAMKK2	Coding	Click Me	1	-0.179	176	-27.11	0	1	0	0	3100
ENCT00000424376	CATG00000098647.1	Coding	Click Me	1	-0.331	184	-27.85	0	1	0	0	1000
ENST00000367576	LTV1	Coding	Click Me	1	-0.203	152	-21.65	0	0	1	0	801
ENCT00000285736	CATG00000059214.1	Coding	Click Me	1	-0.213	157	-24.14	0	1	0	0	1000
ENST00000259241	HS6ST1	Coding	Click Me	1	-0.149	147	-29.38	0	1	0	0	2688
ENST00000262710	ACIN1	Coding	Click Me	1	-0.233	144	-19.38	0	0	1	0	581
ENST00000262244	MOB3B	Coding	Click Me	1	-0.234	141	-16.9	0	0	1	0	5378
ENST00000264161	DARS	Coding	Click Me	1	-0.164	176	-26.58	0	0	1	0	2382
ENST00000264162	LCT	Coding	Click Me	1	-0.197	151	-27.26	0	1	0	0	484
ENST00000253099	MRPL4	Coding	Click Me	1	-0.144	168	-22.13	0	1	0	0	258
ENST00000380701	CCDC171	Coding	Click Me	1	-0.126	144	-17.41	0	0	1	0	4569
NM_001300937	SRSF10	Coding	Click Me	1	-0.114	141	-23.94	0	0	1	0	3316
ENST00000327347	SEPHS1	Coding	Click Me	1	-0.138	147	-17.95	0	0	1	0	3675
ENST00000265709	ANK1	Coding	Click Me	1	-0.11	140	-14.55	0	0	1	0	2502
ENST00000435041	UBE2J1	Coding	Click Me	1	-0.119	149	-19.49	0	0	1	0	5363
ENST00000371244	PRKAA2	Coding	Click Me	1	-0.195	144	-19.11	0	0	1	0	7622
ENST00000489671	TFDP2	Coding	Click Me	1	-0.103	155	-21.61	1	0	0	0	8085
uc001jin.3	TIMM23B	Coding	Click Me	1	-0.185	148	-20.16	0	0	1	0	1786
ENST00000360416	MYH10	Coding	Click Me	1	-0.212	169	-24	0	1	0	0	1599
ENST00000615230	TNFRSF9	Coding	Click Me	1	-0.257	160	-19.37	0	1	0	0	4941
ENST00000370445	BARHL2	Coding	Click Me	1	-0.117	143	-21.76	0	1	0	0	773
ENST00000278025	FUOM	Coding	Click Me	1	-0.196	161	-27.78	0	1	0	0	359
ENST00000619898	SPCS1	Coding	Click Me	1	-0.221	152	-20.22	0	0	1	0	3334
ENST00000476120	ZNF273	Coding	Click Me	1	-0.214	144	-13.71	0	0	1	0	3890
ENST00000274008	SPATA5	Coding	Click Me	1	-0.141	140	-17.63	0	0	1	0	5386
ENST00000264499	BBS7	Coding	Click Me	1	-0.157	146	-15.27	0	0	1	0	1531
ENST00000369893	SFXN2	Coding	Click Me	1	-0.15	154	-23.75	0	1	0	0	5730
ENST00000339223	FPR3	Coding	Click Me	1	-0.445	140	-20.73	1	0	0	0	1379
ENST00000296953	CREBRF	Coding	Click Me	1	-0.148	147	-15.34	0	0	1	0	5539
ENST00000379426	TMEM170B	Coding	Click Me	1	-0.104	157	-25.86	1	0	0	0	7963
ENST00000320743	LRIG3	Coding	Click Me	1	-0.206	144	-14.17	0	0	1	0	423
ENST00000379938	RREB1	Coding	Click Me	1	-0.104	140	-19.85	0	0	1	0	3012
ENST00000290650	UBR1	Coding	Click Me	2	-0.335	307	-48.75	0	0	2	0	2432
ENST00000320585	CHORDC1	Coding	Click Me	1	-0.127	143	-13.06	0	0	1	0	2323
ENST00000371652	TMEM189	Coding	Click Me	1	-0.153	162	-17.84	1	0	0	0	6804
ENST00000320580	PACS1	Coding	Click Me	2	-0.408	297	-37.99	0	1	1	0	5014
ENST00000334690	TRAPPC11	Coding	Click Me	1	-0.391	155	-25.96	1	0	0	0	950
ENST00000261667	KPNA3	Coding	Click Me	1	-0.188	158	-18.77	0	0	1	0	4057
ENST00000267843	FGF7	Coding	Click Me	1	-0.146	155	-25.28	0	0	1	0	4271
ENST00000397332	MYCL	Coding	Click Me	1	-0.188	140	-20.71	0	0	1	0	1948
ENST00000284984	ADAMTS1	Coding	Click Me	1	-0.143	151	-16.78	0	0	1	0	1889
ENST00000646896	TCEAL9	Coding	Click Me	1	-0.186	149	-16.54	0	0	1	0	456
ENST00000270162	SIK1	Coding	Click Me	1	-0.156	174	-32.81	0	1	0	0	2258
ENST00000396319	TAX1BP1	Coding	Click Me	1	-0.207	151	-17.86	0	0	1	0	1848
ENST00000232217	RBP2	Coding	Click Me	1	-0.193	145	-15.88	0	0	1	0	4364
ENST00000257548	USP30	Coding	Click Me	1	-0.107	146	-23.65	0	0	1	0	2095
ENST00000181796	FAM107B	Coding	Click Me	1	-0.353	166	-20.38	0	1	0	0	2630
ENST00000430524	RANBP1	Coding	Click Me	1	-0.301	148	-18.77	1	0	0	0	687
ENST00000359193	HIST1H2AG	Coding	Click Me	1	-0.1	141	-16.5	0	0	1	0	2355
ENST00000619231	ZNF568	Coding	Click Me	1	-0.184	152	-19.15	0	0	1	0	1653
ENST00000222305	USF2	Coding	Click Me	1	-0.223	151	-18.58	0	0	1	0	556
ENST00000235332	MIIP	Coding	Click Me	1	-0.231	145	-20.01	0	1	0	0	824
ENST00000312584	TNFRSF10D	Coding	Click Me	1	-0.118	145	-17.19	0	0	1	0	2282
ENST00000458420	CLSTN2	Coding	Click Me	1	-0.131	147	-22.82	0	0	1	0	11999
ENST00000359775	ZDHHC14	Coding	Click Me	1	-0.189	140	-17.23	0	0	1	0	5024
ENST00000624776	ZNF518A	Coding	Click Me	1	-0.217	157	-15.55	0	0	1	0	2978
ENST00000377482	ERRFI1	Coding	Click Me	1	-0.101	156	-28.56	0	0	1	0	1668
ENST00000044462	PSMA4	Coding	Click Me	1	-0.182	142	-12.89	0	0	1	0	2072
ENST00000359286	ZNF705A	Coding	Click Me	1	-0.157	162	-25.15	0	0	1	0	2463
ENST00000603548	FBXW7	Coding	Click Me	1	-0.102	148	-21.84	0	0	1	0	2337
ENST00000592533	ZNF540	Coding	Click Me	1	-0.175	141	-18.43	0	0	1	0	832
ENST00000646357	FO393400.1	Coding	Click Me	1	-0.115	152	-22.6	0	0	1	0	1795
ENST00000392547	WIPF1	Coding	Click Me	1	-0.166	169	-25.32	0	0	1	0	2979
ENST00000308284	SEC16B	Coding	Click Me	1	-0.114	141	-17.69	0	0	1	0	2292
ENST00000392017	ATG16L1	Coding	Click Me	1	-0.177	160	-20.06	0	1	0	0	1324
ENST00000563290	SCAPER	Coding	Click Me	1	-0.198	142	-16.66	0	0	1	0	729
ENST00000316623	FBN1	Coding	Click Me	1	-0.118	149	-19.26	0	0	1	0	2848
ENST00000316334	LNX2	Coding	Click Me	1	-0.287	159	-25.34	0	1	0	0	2422
ENST00000278590	ZC3H12C	Coding	Click Me	1	-0.136	146	-14.71	0	0	1	0	6104
ENST00000417314	KBTBD8	Coding	Click Me	2	-0.372	294	-36.83	0	0	2	0	2825
ENST00000546500	HNRNPA1	Coding	Click Me	2	-0.285	287	-49.46	0	1	1	0	2543
ENST00000330501	ZNF397	Coding	Click Me	1	-0.106	160	-16.64	0	1	0	0	4824
ENST00000327906	PHF7	Coding	Click Me	1	-0.214	159	-22.82	0	1	0	0	4647
ENST00000417955	NAPEPLD	Coding	Click Me	1	-0.184	151	-18.21	0	0	1	0	3853
ENST00000529054	MS4A6A	Coding	Click Me	1	-0.232	156	-15.66	0	0	1	0	111
ENST00000282466	IGSF10	Coding	Click Me	1	-0.176	141	-15.12	0	0	1	0	3195
ENST00000229314	GOLT1B	Coding	Click Me	1	-0.133	145	-18.24	0	1	0	0	2704
ENST00000372285	CD40	Coding	Click Me	1	-0.157	144	-15.18	0	0	1	0	823
ENST00000406397	VSNL1	Coding	Click Me	1	-0.186	154	-28.09	0	0	1	0	2244
ENST00000406396	KDSR	Coding	Click Me	1	-0.106	156	-28.45	0	1	0	0	4616
ENST00000331920	PTCH1	Coding	Click Me	1	-0.166	149	-19.57	0	0	1	0	3415
ENST00000258457	C2orf49	Coding	Click Me	1	-0.171	141	-15.77	0	0	1	0	3840
ENST00000273859	ATP10D	Coding	Click Me	2	-0.536	295	-34.8	1	0	1	0	2105
ENST00000314032	UCP3	Coding	Click Me	1	-0.2	142	-16.67	0	0	1	0	1996
ENST00000266712	TMTC3	Coding	Click Me	1	-0.111	147	-15.51	0	0	1	0	4238
ENST00000310981	SFT2D3	Coding	Click Me	1	-0.139	140	-20.89	0	1	0	0	3522
ENST00000262415	DHX8	Coding	Click Me	1	-0.16	152	-20.31	0	1	0	0	1823
ENST00000376663	BMI1	Coding	Click Me	2	-0.423	295	-32.76	0	1	1	0	2090
ENST00000341267	DLK1	Coding	Click Me	1	-0.425	160	-26.16	1	0	0	0	3326
ENST00000295208	ZNF514	Coding	Click Me	1	-0.158	143	-18.54	0	0	1	0	4274
ENST00000331079	PRMT3	Coding	Click Me	1	-0.176	150	-15.8	0	0	1	0	2822
ENST00000265379	COL6A5	Coding	Click Me	1	-0.452	158	-22.19	1	0	0	0	884
ENST00000341446	BRI3BP	Coding	Click Me	1	-0.26	168	-24.94	1	0	0	0	5801
ENST00000427130	NSMAF	Coding	Click Me	1	-0.199	141	-18.54	0	0	1	0	336
ENST00000366960	RPS6KC1	Coding	Click Me	1	-0.326	151	-15.94	1	0	0	0	2139
ENST00000400384	MAPK4	Coding	Click Me	1	-0.109	140	-21.62	0	1	0	0	1972
ENST00000395334	AK4	Coding	Click Me	1	-0.124	167	-19.64	1	0	0	0	5968
ENST00000476549	BTN3A1	Coding	Click Me	1	-0.178	143	-22.42	0	0	1	0	2471
ENST00000272638	UBXN4	Coding	Click Me	1	-0.129	153	-22.12	0	1	0	0	2176
ENST00000645071	TLR4	Coding	Click Me	1	-0.307	159	-18.75	0	1	0	0	10082
ENST00000264157	CCNT2	Coding	Click Me	1	-0.21	157	-14.25	0	0	1	0	4697
HBMT00000626818	CATG00000033628.1	Coding	Click Me	1	-0.324	143	-19.84	1	0	0	0	1000
ENST00000381668	ATP8A1	Coding	Click Me	1	-0.275	166	-21.02	0	1	0	0	4543
ENST00000360538	TOPORS	Coding	Click Me	1	-0.2	140	-16.42	0	0	1	0	843
ENST00000620009	E2F8	Coding	Click Me	1	-0.23	140	-16.91	0	0	1	0	592
ENST00000265717	PRKAR2B	Coding	Click Me	1	-0.15	140	-15.31	0	0	1	0	2229
ENST00000218867	SGCG	Coding	Click Me	1	-0.183	155	-28.62	0	0	1	0	624
ENST00000610310	CGA	Coding	Click Me	1	-0.21	146	-26.37	0	0	1	0	72
ENST00000445593	LAPTM4B	Coding	Click Me	1	-0.12	149	-18.75	0	0	1	0	1539
ENST00000297814	KIF27	Coding	Click Me	1	-0.206	160	-22.59	0	1	0	0	2899
ENST00000371270	CYP2C8	Coding	Click Me	1	-0.166	149	-16.06	0	0	1	0	2751
MICT00000269173	CATG00000069665.1	Coding	Click Me	1	-0.372	151	-19.14	1	0	0	0	1000
ENST00000299320	C16orf71	Coding	Click Me	1	-0.21	150	-18.01	0	0	1	0	681
ENST00000476465	RAB43	Coding	Click Me	1	-0.205	148	-20.76	0	0	1	0	3792
ENST00000539905	PDYN	Coding	Click Me	1	-0.164	140	-22.53	0	1	0	0	1567
ENST00000359943	FAM3C	Coding	Click Me	1	-0.191	143	-14.55	1	0	0	0	2672
ENST00000264710	RAB10	Coding	Click Me	1	-0.234	166	-20.49	0	1	0	0	3553
ENST00000296490	WDR82	Coding	Click Me	1	-0.204	150	-16.96	0	0	1	0	3085
ENST00000353214	ARPC5L	Coding	Click Me	1	-0.137	145	-26.23	0	1	0	0	791
ENST00000405863	NXPH1	Coding	Click Me	1	-0.159	143	-17.43	0	0	1	0	1194
ENST00000360338	ZNF460	Coding	Click Me	1	-0.137	149	-17.81	0	1	0	0	16349
ENST00000173898	TRO	Coding	Click Me	1	-0.163	141	-20.02	0	0	1	0	241
ENST00000370456	GBP6	Coding	Click Me	1	-0.128	160	-21.62	0	0	1	0	2691
ENST00000356725	ZNF790	Coding	Click Me	2	-0.361	297	-44.76	0	1	1	0	4160
ENST00000370454	LRRC8C	Coding	Click Me	1	-0.114	154	-22.21	0	0	1	0	4553
ENST00000268035	IGF1R	Coding	Click Me	2	-0.637	320	-37.78	1	0	1	0	7088
ENST00000308700	ISX	Coding	Click Me	1	-0.145	145	-15.06	0	1	0	0	1694
ENST00000532828	ZNF585B	Coding	Click Me	1	-0.218	146	-15.6	0	0	1	0	4112
ENST00000230990	HBEGF	Coding	Click Me	1	-0.155	161	-20.19	0	0	1	0	1456
ENST00000290649	AMFR	Coding	Click Me	1	-0.356	163	-17.57	0	1	0	0	1481
ENST00000409947	MAP3K2	Coding	Click Me	3	-0.556	446	-57.17	1	0	2	0	8910
ENST00000301399	ZNF577	Coding	Click Me	2	-0.348	286	-31.44	0	0	2	0	1250
ENST00000381042	PNPLA4	Coding	Click Me	1	-0.125	140	-16.1	0	0	1	0	2441
ENST00000440960	PRELID3A	Coding	Click Me	1	-0.323	146	-22.23	1	0	0	0	1117
ENST00000419277	HLA-DPA1	Coding	Click Me	1	-0.214	157	-18.32	0	1	0	0	791
ENST00000332715	URAD	Coding	Click Me	1	-0.429	156	-18.55	1	0	0	0	392
ENST00000324685	RNF40	Coding	Click Me	1	-0.132	140	-20.05	0	0	1	0	2193
ENST00000641592	OR2A12	Coding	Click Me	1	-0.18	141	-12.67	0	0	1	0	2913
ENST00000368564	KPNA5	Coding	Click Me	2	-0.42	307	-43.5	1	0	1	0	3321
ENST00000515780	TMEM150C	Coding	Click Me	1	-0.202	160	-19.82	0	1	0	0	2622
ENST00000409382	ST6GAL2	Coding	Click Me	1	-0.166	142	-18.23	0	0	1	0	5074
ENST00000261332	ZNF24	Coding	Click Me	1	-0.134	158	-20.81	0	0	1	0	5027
ENST00000378076	ITGA8	Coding	Click Me	1	-0.15	149	-19.56	0	0	1	0	3209
ENST00000451402	PPP6C	Coding	Click Me	1	-0.116	143	-15.71	0	0	1	0	3099
ENST00000370608	MCOLN2	Coding	Click Me	1	-0.16	140	-15.45	0	0	1	0	2623
ENST00000356386	BTN3A2	Coding	Click Me	1	-0.175	143	-22.42	0	0	1	0	1826
ENST00000377921	RSU1	Coding	Click Me	1	-0.135	150	-19.3	1	0	0	0	3599
ENST00000302287	VSTM2A	Coding	Click Me	1	-0.135	143	-19.62	0	0	1	0	2260
ENST00000267549	GPR65	Coding	Click Me	1	-0.109	149	-18.18	0	0	1	0	3002
ENST00000392806	TMEM119	Coding	Click Me	1	-0.172	160	-27.74	0	1	0	0	1686
ENST00000327668	ZNF84	Coding	Click Me	1	-0.125	140	-25.39	0	0	1	0	4365
ENST00000436581	RUNX1T1	Coding	Click Me	1	-0.195	141	-15.35	0	0	1	0	5275
ENST00000261726	CUX2	Coding	Click Me	1	-0.22	159	-19.14	0	1	0	0	2229
ENST00000249501	HOXD10	Coding	Click Me	1	-0.217	141	-30.51	0	1	0	0	720
ENST00000270001	ZFP14	Coding	Click Me	1	-0.201	144	-20.72	0	0	1	0	5771
ENST00000393313	ZNF800	Coding	Click Me	1	-0.174	142	-18.74	0	0	1	0	1774
ENST00000374580	BMPR2	Coding	Click Me	1	-0.13	160	-18.32	1	0	0	0	7805
ENST00000307017	USP38	Coding	Click Me	1	-0.203	146	-15.78	0	0	1	0	3418
ENST00000245312	SLC10A2	Coding	Click Me	1	-0.106	143	-22.03	0	0	1	0	2135
ENST00000451085	LRRN3	Coding	Click Me	1	-0.218	146	-21.54	0	0	1	0	552
ENST00000302068	FGB	Coding	Click Me	1	-0.143	154	-20.62	0	0	1	0	2577
ENST00000334241	ZNF555	Coding	Click Me	1	-0.162	142	-20.13	0	0	1	0	6532
ENST00000306388	TBCA	Coding	Click Me	1	-0.117	144	-19.22	0	0	1	0	1962
ENST00000324262	CNDP2	Coding	Click Me	1	-0.134	148	-19.16	0	1	0	0	3386
MICT00000004922	CATG00000043245.1	Coding	Click Me	1	-0.138	153	-23.55	0	1	0	0	1000
ENST00000257287	CEP135	Coding	Click Me	1	-0.14	152	-21.28	0	0	1	0	2015
ENST00000276410	CHRNA6	Coding	Click Me	1	-0.177	143	-21.54	0	0	1	0	559
ENST00000282272	ANKRD44	Coding	Click Me	1	-0.167	148	-23.79	0	0	1	0	2999
ENST00000316634	SNAPC5	Coding	Click Me	1	-0.158	140	-16.2	0	0	1	0	2888
ENST00000435907	CHST15	Coding	Click Me	1	-0.145	142	-21.17	0	0	1	0	2483
ENST00000531206	CDC27	Coding	Click Me	1	-0.169	152	-18.97	0	0	1	0	680
ENST00000303714	ANTXR1	Coding	Click Me	1	-0.117	149	-20.61	0	0	1	0	3842
ENST00000373233	CHD6	Coding	Click Me	1	-0.131	149	-22.15	0	0	1	0	2492
ENCT00000276512	CATG00000057133.1	Coding	Click Me	1	-0.176	154	-24.12	0	1	0	0	1000
ENST00000613569	TOX4	Coding	Click Me	1	-0.136	142	-17.71	0	0	1	0	2555
ENCT00000434997	CATG00000102401.1	Coding	Click Me	1	-0.187	161	-21.83	0	1	0	0	1000
ENST00000392373	STX2	Coding	Click Me	1	-0.169	145	-15.43	1	0	0	0	2423
ENST00000238994	PPP1R3C	Coding	Click Me	1	-0.191	143	-19.47	0	0	1	0	1487
ENST00000312938	ZBTB11	Coding	Click Me	1	-0.146	146	-18.03	0	0	1	0	2277
ENST00000297151	SLU7	Coding	Click Me	1	-0.14	155	-19.65	0	0	1	0	1644
ENST00000337198	AZIN1	Coding	Click Me	1	-0.197	143	-19.12	0	0	1	0	4604
HBMT00000220955	CATG00000002605.1	Coding	Click Me	1	-0.402	154	-18.6	1	0	0	0	1000
ENCT00000161593	CATG00000028260.1	Coding	Click Me	1	-0.216	153	-20.34	0	1	0	0	1000
ENST00000263734	EPAS1	Coding	Click Me	1	-0.172	154	-17.24	0	1	0	0	2043
ENST00000323944	STXBP6	Coding	Click Me	2	-0.299	319	-53.92	0	0	2	0	3047
ENST00000295926	CCNL1	Coding	Click Me	1	-0.138	154	-16.41	0	0	1	0	1202
ENST00000256398	ELP3	Coding	Click Me	2	-0.304	302	-39.54	0	0	2	0	1431
ENST00000645668	TSEN15	Coding	Click Me	1	-0.451	158	-18.87	1	0	0	0	1365
ENST00000285298	MRPS17	Coding	Click Me	1	-0.186	150	-18.67	0	0	1	0	1334
ENST00000315677	DLGAP1	Coding	Click Me	1	-0.14	140	-14.46	0	0	1	0	3153
ENST00000564996	KLHL36	Coding	Click Me	1	-0.161	145	-18.89	0	1	0	0	5348
ENST00000445323	MTMR1	Coding	Click Me	1	-0.279	161	-20.83	1	0	0	0	2442
ENST00000298317	RPUSD4	Coding	Click Me	1	-0.122	159	-29.85	0	0	1	0	1324
ENST00000521891	ZFHX4	Coding	Click Me	1	-0.213	166	-24.66	0	0	1	0	2720
ENST00000220597	PAG1	Coding	Click Me	1	-0.135	148	-21.15	0	0	1	0	8734
ENST00000380099	KL	Coding	Click Me	2	-0.398	302	-37.19	1	0	1	0	1959
ENST00000269391	RNF157	Coding	Click Me	1	-0.113	140	-20.07	0	1	0	0	2782
ENST00000542664	HTR2A	Coding	Click Me	1	-0.194	146	-18.29	0	0	1	0	3282
ENST00000228347	POLR3B	Coding	Click Me	1	-0.24	176	-22.31	0	1	0	0	1667
ENST00000394747	ABCC11	Coding	Click Me	1	-0.224	142	-13.37	0	0	1	0	363
ENST00000303635	CAMTA1	Coding	Click Me	1	-0.21	158	-19.22	0	0	1	0	3215
ENST00000394052	KRT222	Coding	Click Me	2	-0.377	297	-39.59	0	0	2	0	1865
ENCT00000330062	CATG00000072238.1	Coding	Click Me	1	-0.216	140	-13.23	0	0	1	0	1000
ENST00000612570	NDFIP2	Coding	Click Me	1	-0.123	164	-20.24	0	0	1	0	3557
ENST00000367510	RNF2	Coding	Click Me	1	-0.104	152	-15.28	0	0	1	0	2548
ENST00000337843	C1QTNF6	Coding	Click Me	1	-0.183	155	-28.4	0	1	0	0	2022
ENST00000332912	SPATA45	Coding	Click Me	1	-0.268	161	-25.05	0	1	0	0	101
ENST00000262262	CD33	Coding	Click Me	1	-0.194	153	-19.45	0	0	1	0	331
ENST00000354992	LARGE1	Coding	Click Me	1	-0.313	150	-21.09	0	1	0	0	1895
ENST00000596143	ZNF714	Coding	Click Me	1	-0.142	151	-21.83	0	0	1	0	6748
ENST00000261461	PPP2R5A	Coding	Click Me	1	-0.183	141	-13.09	0	0	1	0	1093
ENST00000540033	EVI5	Coding	Click Me	1	-0.182	154	-18.29	0	0	1	0	4926
ENST00000253673	ADGRE3	Coding	Click Me	1	-0.203	143	-13.96	0	0	1	0	194
ENST00000232905	EIF1B	Coding	Click Me	1	-0.173	145	-12.4	0	0	1	0	660
ENST00000559488	ITGB3	Coding	Click Me	1	-0.307	160	-20.75	1	0	0	0	3536
ENST00000331113	KCND2	Coding	Click Me	1	-0.205	152	-17.19	0	0	1	0	2475
ENST00000269489	SERPINB13	Coding	Click Me	1	-0.132	142	-18.33	0	0	1	0	1835
ENST00000273666	STXBP5L	Coding	Click Me	1	-0.385	154	-15.05	1	0	0	0	5664
FTMT24800002725	CATG00000009021.1	Coding	Click Me	1	-0.145	151	-26.99	0	1	0	0	947
ENST00000601380	ANKDD1B	Coding	Click Me	1	-0.236	162	-25.66	0	1	0	0	806
ENST00000264709	DNMT3A	Coding	Click Me	1	-0.117	147	-20.7	0	1	0	0	6424
ENST00000507469	SMG7	Coding	Click Me	1	-0.344	168	-20.57	0	1	0	0	1269
ENST00000367350	KIF14	Coding	Click Me	1	-0.216	182	-29.35	0	1	0	0	1891
ENST00000216024	DMC1	Coding	Click Me	1	-0.175	150	-21.63	0	0	1	0	1071
ENST00000297770	CPA6	Coding	Click Me	1	-0.224	142	-14.34	0	0	1	0	432
ENST00000264036	MCAM	Coding	Click Me	1	-0.119	149	-17.36	0	0	1	0	1362
ENST00000360342	LZTS3	Coding	Click Me	1	-0.475	145	-15.21	1	0	0	0	1837
NM_001042404	CEP170	Coding	Click Me	1	-0.221	147	-17.4	0	1	0	0	2021
ENST00000247956	ZNF317	Coding	Click Me	1	-0.19	163	-18.83	0	1	0	0	4777
ENST00000274063	SFRP2	Coding	Click Me	1	-0.151	148	-28.45	0	0	1	0	861
ENST00000310799	C11orf45	Coding	Click Me	1	-0.224	155	-20.15	0	1	0	0	2992
ENST00000621650	ZNF8	Coding	Click Me	1	-0.153	148	-22.45	0	0	1	0	7269
ENST00000339249	ZNF449	Coding	Click Me	1	-0.166	145	-15.67	0	1	0	0	2688
ENST00000296795	TLR3	Coding	Click Me	1	-0.163	141	-13.03	0	0	1	0	3502
ENST00000523638	ZNF260	Coding	Click Me	1	-0.175	152	-14.64	0	0	1	0	3313
ENST00000287169	ZDHHC5	Coding	Click Me	2	-0.32	313	-45.8	0	1	1	0	1156
ENST00000264454	SEC22C	Coding	Click Me	1	-0.213	150	-28.47	0	1	0	0	5281
ENST00000296776	TMEM174	Coding	Click Me	1	-0.136	152	-13.4	0	0	1	0	978
ENST00000239243	MSX2	Coding	Click Me	1	-0.164	157	-24.38	0	0	1	0	4115
ENST00000264451	SLC30A9	Coding	Click Me	1	-0.351	156	-19.04	1	0	0	0	4331
ENST00000441178	RPEL1	Coding	Click Me	1	-0.129	140	-17.09	0	0	1	0	1333
ENST00000324679	SAV1	Coding	Click Me	1	-0.17	141	-16.18	0	0	1	0	1603
ENST00000361582	DZIP3	Coding	Click Me	1	-0.151	140	-18.2	0	0	1	0	1493
ENST00000379245	FEZ2	Coding	Click Me	1	-0.26	146	-16.27	0	1	0	0	925
ENST00000361580	KIFAP3	Coding	Click Me	1	-0.184	146	-23.78	0	0	1	0	603
ENST00000379715	EEF1E1	Coding	Click Me	1	-0.209	140	-12.21	0	0	1	0	874
ENST00000640252	PIGN	Coding	Click Me	1	-0.162	148	-22.92	0	0	1	0	4692
ENST00000297354	SBSPON	Coding	Click Me	1	-0.178	140	-13.56	0	0	1	0	2801
ENST00000354258	TAP1	Coding	Click Me	1	-0.276	168	-21.39	0	1	0	0	379
ENST00000361367	CTR9	Coding	Click Me	1	-0.17	142	-20.17	0	0	1	0	647
ENST00000260356	THBS1	Coding	Click Me	1	-0.144	161	-22.87	0	1	0	0	4097
ENST00000324787	MRPS33	Coding	Click Me	1	-0.13	144	-18.81	0	0	1	0	3820
ENST00000270560	TM4SF5	Coding	Click Me	1	-0.117	149	-19.99	0	0	1	0	2157
ENST00000307712	SEC23A	Coding	Click Me	1	-0.191	145	-18.57	0	0	1	0	1319
ENST00000399799	ROCK1	Coding	Click Me	1	-0.213	147	-16.21	0	1	0	0	4478
ENST00000369023	NSMCE4A	Coding	Click Me	1	-0.226	163	-20.32	0	1	0	0	184
uc003jss.4	BC032910	Coding	Click Me	1	-0.153	142	-15.16	0	0	1	0	915
ENST00000373130	STK40	Coding	Click Me	1	-0.476	153	-14.55	1	0	0	0	2131
ENST00000321143	HCCS	Coding	Click Me	1	-0.223	141	-16.16	0	0	1	0	1274
ENST00000638972	ADAMTS19	Coding	Click Me	1	-0.164	147	-17.35	0	0	1	0	1465
ENST00000374135	GPN2	Coding	Click Me	1	-0.289	160	-24.18	0	1	0	0	3546
ENST00000329410	C16orf54	Coding	Click Me	1	-0.192	150	-14.97	0	0	1	0	1814
ENST00000373034	PCDH19	Coding	Click Me	1	-0.234	150	-17.5	0	0	1	0	4633
ENST00000382038	RAD1	Coding	Click Me	1	-0.126	149	-18.46	0	0	1	0	3504
ENST00000511367	DROSHA	Coding	Click Me	1	-0.505	156	-18.66	1	0	0	0	937
ENST00000393780	GAP43	Coding	Click Me	1	-0.216	145	-21.6	0	0	1	0	608
ENST00000467789	SSR3	Coding	Click Me	1	-0.173	150	-23.49	0	0	1	0	382
NM_001039615	ZNF705D	Coding	Click Me	1	-0.154	154	-22.38	0	0	1	0	2358
ENST00000238508	SERPINB10	Coding	Click Me	1	-0.185	155	-21.25	0	0	1	0	869
ENST00000313146	ISG20L2	Coding	Click Me	1	-0.227	150	-14.27	0	0	1	0	1500
ENST00000436909	TENT4B	Coding	Click Me	1	-0.135	146	-17.91	0	0	1	0	2503
ENST00000358022	TUSC1	Coding	Click Me	1	-0.196	141	-15.19	0	0	1	0	1294
FTMT28800001191	CATG00000057657.1	Coding	Click Me	2	-0.485	320	-43.01	1	1	0	0	1000
ENST00000307441	ZNF33A	Coding	Click Me	1	-0.402	162	-18.3	1	0	0	0	3503
ENST00000421673	MUC6	Coding	Click Me	1	-0.118	140	-24.9	0	1	0	0	635
ENST00000377024	C9orf57	Coding	Click Me	1	-0.178	144	-19.26	0	0	1	0	920
ENST00000475541	PURG	Coding	Click Me	1	-0.175	145	-14.53	0	0	1	0	5353
FTMT20400000680	CATG00000025492.1	Coding	Click Me	1	-0.424	153	-20.47	1	0	0	0	221
ENST00000396197	UEVLD	Coding	Click Me	1	-0.185	147	-12.21	0	0	1	0	2717
ENST00000494664	TIMMDC1	Coding	Click Me	1	-0.169	156	-19.77	0	0	1	0	1334
ENST00000304385	TMEM154	Coding	Click Me	1	-0.136	151	-18.24	0	0	1	0	9914
ENST00000282486	MBNL1	Coding	Click Me	1	-0.218	146	-19.8	0	0	1	0	3413
ENST00000397897	AL591025.1	Coding	Click Me	1	-0.276	157	-16.37	0	1	0	0	50
ENST00000264444	MXD1	Coding	Click Me	1	-0.113	142	-13.11	0	0	1	0	4661
ENST00000439399	SNAP91	Coding	Click Me	1	-0.173	156	-26.65	0	0	1	0	1411
ENST00000641925	OR2T2	Coding	Click Me	1	-0.167	142	-17.56	0	0	1	0	1953
MICT00000236022	CATG00000058026.1	Coding	Click Me	1	-0.285	146	-15.68	0	1	0	0	1000
ENST00000244360	RNF39	Coding	Click Me	1	-0.22	168	-23.27	0	1	0	0	845
ENST00000396426	SEPT3	Coding	Click Me	1	-0.133	160	-23.9	0	0	1	0	1254
ENST00000317089	DNAJA2	Coding	Click Me	1	-0.151	147	-20.42	0	0	1	0	1667
ENST00000263257	NOVA2	Coding	Click Me	1	-0.197	157	-19.73	1	0	0	0	6129
ENST00000382743	SIRT3	Coding	Click Me	1	-0.154	140	-16.4	0	0	1	0	1673
ENST00000377113	CASC10	Coding	Click Me	1	-0.229	144	-18.06	0	0	1	0	2982
ENST00000389297	CFAP69	Coding	Click Me	1	-0.224	141	-14.17	0	0	1	0	825
ENST00000589389	GLYR1	Coding	Click Me	1	-0.148	153	-19.68	0	1	0	0	2033
ENCT00000066324	CATG00000002156.1	Coding	Click Me	2	-0.589	306	-43.4	1	1	0	0	1000
ENST00000266771	SLC15A4	Coding	Click Me	1	-0.201	144	-15.78	0	0	1	0	1002
ENST00000357392	CCRL2	Coding	Click Me	1	-0.214	142	-19.47	0	1	0	0	409
ENST00000383163	PRR23A	Coding	Click Me	1	-0.125	151	-22.25	0	1	0	0	1506
ENST00000304760	SHE	Coding	Click Me	1	-0.145	151	-18.99	0	1	0	0	4671
ENST00000322313	WDR33	Coding	Click Me	1	-0.213	166	-23.47	0	1	0	0	5301
ENST00000372774	TCEAL6	Coding	Click Me	1	-0.171	144	-16.23	0	0	1	0	819
ENST00000337273	TNPO1	Coding	Click Me	1	-0.149	142	-21.41	0	0	1	0	8060
FTMT21800003108	CATG00000079706.1	Coding	Click Me	1	-0.361	150	-15.59	1	0	0	0	1000
ENST00000308249	PPM1E	Coding	Click Me	1	-0.161	140	-19.15	0	0	1	0	4148
ENST00000452015	PPP1R3E	Coding	Click Me	1	-0.289	143	-24.34	1	0	0	0	3661
ENST00000417443	SMIM10L2A	Coding	Click Me	1	-0.112	171	-24.59	0	1	0	0	4804
ENST00000264864	PI4K2B	Coding	Click Me	1	-0.125	142	-13.63	0	0	1	0	2833
HBMT00000658578	CATG00000035011.1	Coding	Click Me	1	-0.19	181	-30.27	0	1	0	0	1000
ENST00000617204	MAP7	Coding	Click Me	1	-0.255	157	-15.05	0	1	0	0	1947

## Sheet: tRF-1 28-Gly-CCC-2
Predicted target genes for tRF-1_28-Gly-CCC-2
# Column A: Seqname, the name the sequence.
# Column B: GeneSymbol, the official gene symbol of the sequence.
# Column C: Type, the type of the transcipt.
# Column D: Diagrams, the diagrams illustrate key features for miRNA binding. See Ref [1,2] for details.
# Column E: Total, the total number of the binding sites on the targets.
# Column F: Context+, the sum of the context+ scores used in TargetScan after version 6.0. More negative is better. See Ref [3] for details.
# Column G: Structure, the sum of the structure scores used in miRanda (Ref [4]). The higher the better.
# Column H: Energy, the sum of the free energy predicted by miRanda (Ref [4]). More negative is better.
# Column I ~ Column L: Counting numbers for different seed match types
# Reference:
[1] Grimson A., et al. MicroRNA Targeting Specificity in Mammals: Determinants beyond Seed Pairing. Molecular Cell, Volume 27, Issue 1, 91-105, 6 July 2007.
[2] Amy E. Pasquinelli. MicroRNAs and their targets: recognition, regulation and an emerging reciprocal relationship. Nature Reviews Genetics, Volume 13, 271-282, 1 April 2012.
[3] David M Garcia., et al. Weak Seed-Pairing Stability and High Target-Site Abundance Decrease the Proficiency of lsy-6 and Other miRNAs. Nat. Struct. Mol. Biol., Volume 18, 1139-1146, 2011.
[4] Enright AJ., el al. miRanda algorithm: MicroRNA targets in Drosophila. Genome Biology, Volume 5, R1, 2003.
Target genes for tRF-1_28-Gly-CCC-2
Target			Sites		TargetScan	miranda		Seed match types				Annotations
Seqname	GeneSymbol	Type	Diagrams	Total	Context+	Structure	Energy	8mer-1a	7mer-m8	7mer-1a	Imperfect	UTR Length
ENST00000244745	SOX4	Coding	Click Me	1	-0.271	140	-25.83	0	1	0	0	4241
ENST00000335987	OVOL1	Coding	Click Me	1	-0.215	159	-27.94	0	1	0	0	1878
MICT00000008117	CATG00000114289.1	Coding	Click Me	1	-0.182	140	-31.12	0	1	0	0	1000
HBMT00001496317	CATG00000110016.1	Coding	Click Me	1	-0.259	148	-33.24	0	1	0	0	1000
ENST00000245206	GOT2	Coding	Click Me	1	-0.361	163	-32.02	0	1	0	0	1054
ENST00000309446	KLF7	Coding	Click Me	1	-0.312	172	-31.66	0	1	0	0	7076
MICT00000184438	CATG00000047605.1	Coding	Click Me	1	-0.302	141	-25.76	0	1	0	0	1000
ENST00000354822	NKX2-1	Coding	Click Me	1	-0.511	157	-28.93	1	0	0	0	1704
ENST00000618040	KCNN3	Coding	Click Me	1	-0.268	158	-24.11	0	1	0	0	10502
ENST00000378412	MMEL1	Coding	Click Me	1	-0.64	159	-29.72	1	0	0	0	347
FTMT20600006947	CATG00000049624.1	Coding	Click Me	2	-0.729	297	-55.05	1	1	0	0	1000
ENST00000274979	ANO7	Coding	Click Me	1	-0.273	140	-30.53	0	1	0	0	1848
ENST00000261318	C12orf49	Coding	Click Me	1	-0.225	178	-33.93	0	1	0	0	7632
ENCT00000411475	CATG00000095801.1	Coding	Click Me	1	-0.318	144	-27.05	0	1	0	0	1000
HBMT00000153253	CATG00000116292.1	Coding	Click Me	1	-0.264	144	-23.63	0	1	0	0	502
HBMT00001546532	CATG00000113630.1	Coding	Click Me	1	-0.215	142	-23.82	0	1	0	0	1000
ENST00000414645	DPY19L4	Coding	Click Me	1	-0.364	158	-25.49	1	0	0	0	3942
ENCT00000328421	CATG00000071713.1	Coding	Click Me	1	-0.267	147	-29.14	0	1	0	0	1000
ENCT00000169854	CATG00000030334.1	Coding	Click Me	1	-0.237	152	-28.22	0	1	0	0	1000
HBMT00000947696	CATG00000058203.1	Coding	Click Me	1	-0.204	152	-30.95	0	1	0	0	1000
HBMT00001348771	CATG00000097294.1	Coding	Click Me	2	-0.475	299	-57.22	0	2	0	0	1000
ENST00000341744	PMEPA1	Coding	Click Me	1	-0.209	152	-25.83	0	1	0	0	3661
ENST00000481739	RXRA	Coding	Click Me	1	-0.513	143	-29.46	1	0	0	0	3972
ENST00000366862	FBXO28	Coding	Click Me	1	-0.399	152	-27.11	0	1	0	0	4301
ENST00000402010	MARK2	Coding	Click Me	1	-0.21	144	-23.56	0	1	0	0	1783
ENST00000401695	RPS14	Coding	Click Me	1	-0.275	140	-25.62	0	1	0	0	1652
ENCT00000035954	CATG00000088083.1	Coding	Click Me	1	-0.297	149	-23.7	0	1	0	0	1000
ENST00000339992	HMX2	Coding	Click Me	1	-0.348	140	-27.79	0	1	0	0	1693
ENST00000331222	CLN8	Coding	Click Me	10	-1.651	1511	-266.4	0	10	0	0	6005
ENST00000641802	OR2C3	Coding	Click Me	1	-0.223	152	-26.62	0	1	0	0	6872
ENST00000231484	PCDH12	Coding	Click Me	1	-0.443	170	-28.91	0	1	0	0	1796
ENST00000497571	KLF6	Coding	Click Me	1	-0.332	162	-32.65	0	1	0	0	3543
ENST00000585580	TSSK6	Coding	Click Me	1	-0.299	140	-32.41	0	1	0	0	387
ENST00000251993	KIAA0930	Coding	Click Me	1	-0.292	151	-28.98	0	1	0	0	1348
ENST00000439326	ZNF844	Coding	Click Me	1	-0.41	179	-36.68	1	0	0	0	4444
ENST00000292524	LRRC14	Coding	Click Me	1	-0.229	150	-30.61	1	0	0	0	4798
HBMT00001310409	CATG00000091932.1	Coding	Click Me	1	-0.228	149	-38.54	0	1	0	0	1000
ENST00000379803	SIN3B	Coding	Click Me	1	-0.156	148	-25.46	0	1	0	0	1626
HBMT00001340171	CATG00000096017.1	Coding	Click Me	1	-0.278	141	-29.05	0	1	0	0	1000
ENST00000328914	FOXK1	Coding	Click Me	1	-0.621	160	-29.02	1	0	0	0	8979
ENST00000380320	EMILIN1	Coding	Click Me	1	-0.255	140	-23.36	0	1	0	0	388
ENST00000328913	MCF2L2	Coding	Click Me	1	-0.282	142	-27.45	0	1	0	0	1337
ENST00000379370	AGRN	Coding	Click Me	1	-0.26	150	-25.75	0	1	0	0	1149
ENST00000456763	MAPKBP1	Coding	Click Me	1	-0.195	149	-28.76	0	1	0	0	2417
ENST00000579991	DYNLL2	Coding	Click Me	1	-0.309	148	-27.59	0	1	0	0	12222
ENST00000428417	TMEM51	Coding	Click Me	1	-0.287	162	-33.17	0	1	0	0	734
HBMT00000335546	CATG00000012243.1	Coding	Click Me	1	-0.263	156	-29.78	0	1	0	0	1000
HBMT00000893309	CATG00000053942.1	Coding	Click Me	1	-0.29	140	-26.33	0	1	0	0	1000
ENST00000357997	ANKLE2	Coding	Click Me	1	-0.28	164	-29.42	0	1	0	0	1739
ENCT00000255365	CATG00000052157.1	Coding	Click Me	1	-0.319	145	-26.64	0	1	0	0	1000
FTMT20600000555	CATG00000047636.1	Coding	Click Me	1	-0.248	165	-31.44	0	1	0	0	1000
ENST00000311027	MADD	Coding	Click Me	1	-0.61	155	-24.87	1	0	0	0	881
ENST00000590083	CBARP	Coding	Click Me	1	-0.366	153	-28.28	1	0	0	0	2607
HBMT00000317165	CATG00000010438.1	Coding	Click Me	1	-0.237	141	-32.32	0	0	1	0	1000
ENCT00000473665	CATG00000112857.1	Coding	Click Me	1	-0.213	147	-31.2	0	1	0	0	1000
ENST00000306318	GBX2	Coding	Click Me	1	-0.104	168	-39.29	0	1	0	0	4571
ENST00000290759	ISL2	Coding	Click Me	1	-0.201	141	-20.72	0	1	0	0	5065
ENST00000428771	HES4	Coding	Click Me	2	-0.533	304	-58.73	0	2	0	0	3062
ENST00000524821	C8orf82	Coding	Click Me	1	-0.238	151	-29.82	0	1	0	0	1609
HBMT00000023668	CATG00000012032.1	Coding	Click Me	1	-0.608	143	-22.67	1	0	0	0	865
ENST00000270570	SLC47A1	Coding	Click Me	1	-0.122	150	-29.92	0	1	0	0	3642
ENST00000452733	CYTH2	Coding	Click Me	1	-0.194	141	-27.98	0	1	0	0	3104
HBMT00000763260	CATG00000042334.1	Coding	Click Me	1	-0.323	161	-31.13	0	1	0	0	1000
ENST00000264930	SLC12A7	Coding	Click Me	1	-0.207	141	-27.6	0	1	0	0	1986
ENST00000331163	PDGFB	Coding	Click Me	1	-0.352	145	-27.61	0	1	0	0	1983
ENST00000335012	C3orf70	Coding	Click Me	1	-0.154	151	-27.36	0	1	0	0	4957
FTMT21800006577	CATG00000080524.1	Coding	Click Me	2	-0.471	307	-55.7	0	2	0	0	911
ENST00000265164	CASP6	Coding	Click Me	1	-0.379	140	-21.31	0	1	0	0	588
FTMT20200000122	CATG00000043521.1	Coding	Click Me	1	-0.297	141	-28.51	0	0	1	0	1000
ENST00000261965	TUBGCP3	Coding	Click Me	1	-0.319	152	-24.4	0	1	0	0	989
ENCT00000192746	CATG00000035925.1	Coding	Click Me	1	-0.278	156	-28.82	0	1	0	0	1000
HBMT00001058196	CATG00000067714.1	Coding	Click Me	2	-0.513	291	-60.51	0	2	0	0	800
ENST00000406686	SLC22A23	Coding	Click Me	1	-0.658	163	-32.2	1	0	0	0	3597
ENST00000380310	FBXL19	Coding	Click Me	1	-0.312	162	-26.42	0	1	0	0	1553
HBMT00000942443	CATG00000057703.1	Coding	Click Me	1	-0.226	141	-29.55	0	1	0	0	789
HBMT00001547309	CATG00000113699.1	Coding	Click Me	1	-0.293	168	-38.03	0	1	0	0	1000
HBMT00000010718	CATG00000103299.1	Coding	Click Me	1	-0.316	151	-22.64	0	1	0	0	1000
ENST00000262811	MAST3	Coding	Click Me	1	-0.31	149	-28.71	0	1	0	0	1966
MICT00000370207	CATG00000107423.1	Coding	Click Me	1	-0.334	153	-28.01	0	1	0	0	1000
HBMT00000590890	CATG00000030646.1	Coding	Click Me	1	-0.189	140	-31.49	0	1	0	0	1000
ENST00000216264	CERK	Coding	Click Me	1	-0.446	142	-24.56	1	0	0	0	2731
ENST00000377050	UBD	Coding	Click Me	2	-0.504	312	-55.15	1	1	0	0	3328
ENST00000296127	ZDHHC3	Coding	Click Me	1	-0.125	156	-26.14	0	1	0	0	11428
ENST00000233638	TLX2	Coding	Click Me	1	-0.286	149	-26.23	0	1	0	0	959
ENCT00000268338	CATG00000055276.1	Coding	Click Me	1	-0.272	147	-27.1	0	1	0	0	1000
ENST00000366672	GALNT2	Coding	Click Me	1	-0.13	153	-27.35	0	1	0	0	4816
ENST00000402693	MEX3D	Coding	Click Me	1	-0.247	148	-33.52	0	1	0	0	894
ENCT00000415367	CATG00000096677.1	Coding	Click Me	1	-0.268	150	-27.54	0	1	0	0	1000
ENCT00000192785	CATG00000035958.1	Coding	Click Me	1	-0.296	161	-31.21	0	1	0	0	763
ENST00000347785	CD5	Coding	Click Me	1	-0.304	148	-24.69	0	1	0	0	1567
ENST00000543887	AC019294.1	Coding	Click Me	1	-0.295	168	-34.18	0	1	0	0	574
ENCT00000272151	CATG00000056264.1	Coding	Click Me	1	-0.231	144	-30.18	0	1	0	0	1000
ENCT00000360106	CATG00000080562.1	Coding	Click Me	1	-0.14	156	-30.85	0	1	0	0	1000
ENST00000276925	CDKN2B	Coding	Click Me	1	-0.375	150	-23.59	0	1	0	0	3089
ENST00000528655	ADM	Coding	Click Me	1	-0.554	141	-28.07	1	0	0	0	714
ENST00000381365	C17orf107	Coding	Click Me	1	-0.247	152	-26.85	0	1	0	0	2399
MICT00000352992	CATG00000101268.1	Coding	Click Me	1	-0.5	142	-29.48	1	0	0	0	1000
ENST00000428638	ARHGAP27	Coding	Click Me	1	-0.289	141	-27.75	0	1	0	0	1554
HBMT00000171054	CATG00000000494.1	Coding	Click Me	1	-0.289	140	-24.61	0	1	0	0	1000
ENST00000297477	TMEM184A	Coding	Click Me	1	-0.318	149	-29.94	1	0	0	0	4722
ENST00000377307	ARHGAP39	Coding	Click Me	1	-0.289	165	-30.68	0	1	0	0	1243
ENST00000609256	BHLHA15	Coding	Click Me	1	-0.313	156	-29.8	0	1	0	0	2576
ENST00000323662	KIAA1875	Coding	Click Me	1	-0.321	152	-27.19	0	1	0	0	2022
ENST00000356083	COL27A1	Coding	Click Me	2	-0.857	311	-54.04	1	1	0	0	1821
ENST00000540331	ZNF701	Coding	Click Me	1	-0.367	148	-20.35	1	0	0	0	3717
HBMT00000033341	CATG00000022755.1	Coding	Click Me	1	-0.316	167	-33.29	0	1	0	0	1000
HBMT00000544770	CATG00000027401.1	Coding	Click Me	1	-0.599	156	-29.8	1	0	0	0	1000
ENST00000223398	CLIP2	Coding	Click Me	1	-0.203	143	-26.47	0	1	0	0	2095
ENST00000306801	RPTOR	Coding	Click Me	1	-0.178	143	-26.09	0	1	0	0	2341
ENST00000330106	CEND1	Coding	Click Me	1	-0.621	145	-26.32	1	0	0	0	1023
ENST00000398073	CTDSP2	Coding	Click Me	1	-0.201	143	-25.86	0	1	0	0	3691
ENST00000417456	AC114490.3	Coding	Click Me	1	-0.284	155	-25.62	0	1	0	0	2987
ENST00000394077	RPL24	Coding	Click Me	1	-0.642	155	-20.55	1	0	0	0	3477
ENST00000562955	SZT2	Coding	Click Me	1	-0.121	145	-26.55	0	1	0	0	4709
ENCT00000021736	CATG00000047496.1	Coding	Click Me	1	-0.271	150	-27.59	0	1	0	0	1000
ENST00000412770	PPP6R1	Coding	Click Me	1	-0.323	159	-28.96	0	1	0	0	749
ENST00000374280	EXTL1	Coding	Click Me	1	-0.233	150	-27.38	0	1	0	0	1117
ENST00000370823	MTG2	Coding	Click Me	1	-0.276	154	-27.49	0	1	0	0	1916
MICT00000301344	CATG00000083541.1	Coding	Click Me	1	-0.235	148	-32.41	0	1	0	0	794
ENST00000348624	AP5Z1	Coding	Click Me	1	-0.253	147	-28.68	0	1	0	0	3010
FTMT21000001030	CATG00000064049.1	Coding	Click Me	3	-0.664	463	-87.17	0	3	0	0	936
ENST00000538168	ST8SIA5	Coding	Click Me	1	-0.298	156	-26.9	0	1	0	0	12221
ENST00000355209	POLR3H	Coding	Click Me	1	-0.226	171	-36.29	0	1	0	0	3457
ENST00000374242	INIP	Coding	Click Me	1	-0.195	149	-32.49	0	1	0	0	3873
FTMT22000000086	CATG00000074973.1	Coding	Click Me	1	-0.255	146	-31.99	0	1	0	0	1000
ENST00000375446	NINJ1	Coding	Click Me	1	-0.195	146	-20.9	0	1	0	0	5217
ENCT00000108153	CATG00000013621.1	Coding	Click Me	1	-0.361	141	-18.99	0	1	0	0	1000
ENST00000356392	CCDC151	Coding	Click Me	1	-0.242	154	-31.94	0	1	0	0	231
ENST00000409031	SMPD4	Coding	Click Me	1	-0.307	164	-31.76	0	1	0	0	1146
HBMT00000082161	CATG00000085266.1	Coding	Click Me	2	-0.5	309	-57.24	0	2	0	0	1000
ENST00000328313	ENPP7	Coding	Click Me	1	-0.319	156	-30.02	0	1	0	0	429
ENST00000379010	REXO1L1P	Coding	Click Me	1	-0.247	151	-23.05	0	1	0	0	5004
ENST00000397412	CRAMP1	Coding	Click Me	1	-0.326	168	-30.76	0	1	0	0	3863
ENST00000292431	NACC1	Coding	Click Me	1	-0.377	144	-23.52	0	1	0	0	2743
ENST00000305135	YEATS2	Coding	Click Me	1	-0.182	148	-30.98	0	1	0	0	2042
ENCT00000247594	CATG00000049961.1	Coding	Click Me	1	-0.31	160	-28.03	0	1	0	0	1000
ENST00000295886	NKX6-1	Coding	Click Me	1	-0.182	141	-23.87	0	1	0	0	1302
HBMT00000891502	CATG00000053587.1	Coding	Click Me	2	-0.65	296	-60.28	1	1	0	0	1000
ENST00000407236	PPARA	Coding	Click Me	1	-0.125	162	-28.08	0	1	0	0	8375
MICT00000052923	CATG00000004597.1	Coding	Click Me	1	-0.383	151	-29.31	0	1	0	0	1000
ENST00000374115	SLC18A3	Coding	Click Me	1	-0.3	141	-40.19	0	1	0	0	381
HBMT00000772908	CATG00000043838.1	Coding	Click Me	2	-0.627	322	-60.35	0	2	0	0	1000
ENST00000264057	DGKD	Coding	Click Me	1	-0.291	158	-33.34	0	1	0	0	2640
FTMT20600011012	CATG00000050714.1	Coding	Click Me	1	-0.279	140	-27.07	0	1	0	0	1000
ENST00000275517	CDCA5	Coding	Click Me	1	-0.285	151	-25.01	0	1	0	0	1659
ENST00000414822	CDKN1C	Coding	Click Me	1	-0.278	157	-30.15	0	1	0	0	709
HBMT00000995904	CATG00000063921.1	Coding	Click Me	2	-0.409	329	-65.16	0	2	0	0	1000
ENST00000359520	TECPR2	Coding	Click Me	1	-0.146	157	-24.04	0	1	0	0	4224
ENST00000382120	SOD3	Coding	Click Me	1	-0.235	145	-29.35	0	1	0	0	601
HBMT00000695532	CATG00000038271.1	Coding	Click Me	1	-0.267	159	-32.75	0	1	0	0	1000
ENST00000377346	PIK3CD	Coding	Click Me	1	-0.32	157	-26.34	0	1	0	0	1873
FTMT27400002752	CATG00000041525.1	Coding	Click Me	1	-0.607	144	-25.88	1	0	0	0	1000
ENST00000254846	KDM6B	Coding	Click Me	1	-0.236	150	-29.83	0	1	0	0	1279
ENST00000497771	LCN10	Coding	Click Me	1	-0.254	141	-23.33	0	1	0	0	1358
ENST00000371116	FOXD3	Coding	Click Me	1	-0.269	140	-28.82	0	1	0	0	2166
ENCT00000216404	CATG00000041282.1	Coding	Click Me	1	-0.286	151	-28.95	0	1	0	0	1000
ENST00000354366	NRDE2	Coding	Click Me	1	-0.461	148	-28.89	1	0	0	0	2100
ENST00000373012	POU3F1	Coding	Click Me	1	-0.59	151	-26.17	1	0	0	0	1562
ENST00000296350	MELTF	Coding	Click Me	1	-0.187	148	-30.53	0	1	0	0	1632
ENST00000289921	FAM160B2	Coding	Click Me	1	-0.22	148	-29.54	0	1	0	0	1967
ENST00000310112	SNCB	Coding	Click Me	1	-0.607	140	-25.2	1	0	0	0	727
FTMT26600004455	CATG00000034571.1	Coding	Click Me	1	-0.622	161	-28.78	1	0	0	0	408
ENCT00000057224	CATG00000000107.1	Coding	Click Me	1	-0.533	142	-20.08	1	0	0	0	1000
HBMT00001237506	CATG00000085342.1	Coding	Click Me	3	-0.663	452	-88.89	0	3	0	0	513
ENST00000536005	BEAN1	Coding	Click Me	1	-0.321	145	-26.41	0	1	0	0	991
ENST00000288135	KIT	Coding	Click Me	1	-0.499	171	-24.71	0	1	0	0	2226
ENST00000330070	HOXB2	Coding	Click Me	1	-0.228	141	-17.33	0	1	0	0	2259
ENST00000565261	MARVELD3	Coding	Click Me	1	-0.378	168	-30.71	0	1	0	0	1561
HBMT00000303718	CATG00000008616.1	Coding	Click Me	1	-0.293	142	-26.16	0	1	0	0	362
ENST00000546378	HOXC11	Coding	Click Me	1	-0.2	165	-26.45	0	1	0	0	2230
ENCT00000202226	CATG00000038628.1	Coding	Click Me	1	-0.599	159	-26.56	1	0	0	0	1000
MICT00000275432	CATG00000074740.1	Coding	Click Me	1	-0.569	150	-23.36	1	0	0	0	1000
ENST00000292363	RNF126	Coding	Click Me	2	-0.384	296	-62.17	0	2	0	0	3758
ENST00000373115	CHST3	Coding	Click Me	1	-0.331	153	-23.09	0	1	0	0	5093
FTMT20200001842	CATG00000058318.1	Coding	Click Me	1	-0.31	147	-24.29	0	1	0	0	208
ENST00000265986	IDE	Coding	Click Me	1	-0.332	144	-28.41	0	1	0	0	4429
ENST00000275732	GIGYF1	Coding	Click Me	2	-0.523	308	-57.1	0	2	0	0	2212
ENST00000512369	DAPP1	Coding	Click Me	1	-0.32	165	-26.02	0	1	0	0	2004
ENST00000356948	PTBP1	Coding	Click Me	1	-0.272	145	-28.72	0	1	0	0	1501
ENST00000285116	SKA1	Coding	Click Me	1	-0.33	151	-28.04	0	1	0	0	1927
ENST00000641002	OR10Z1	Coding	Click Me	1	-0.373	168	-24.83	0	1	0	0	5134
ENST00000434436	MBD3	Coding	Click Me	1	-0.555	147	-32.42	1	0	0	0	4570
ENST00000380815	GMDS	Coding	Click Me	1	-0.278	140	-23.63	0	1	0	0	363
ENST00000626352	PPIL2	Coding	Click Me	1	-0.311	167	-30.99	0	1	0	0	963
HBMT00000563197	CATG00000029702.1	Coding	Click Me	2	-0.612	283	-59.05	1	1	0	0	1000
MICT00000284128	CATG00000080189.1	Coding	Click Me	1	-0.242	147	-19.83	0	1	0	0	1000
ENCT00000306356	CATG00000065460.1	Coding	Click Me	2	-0.825	307	-55.62	1	1	0	0	1000
HBMT00000626818	CATG00000033628.1	Coding	Click Me	1	-0.345	149	-29.21	0	1	0	0	1000
ENST00000374467	BAK1	Coding	Click Me	1	-0.507	149	-25.41	1	0	0	0	3156
ENST00000272223	OSR1	Coding	Click Me	1	-0.306	151	-30.24	0	1	0	0	790
ENST00000335678	GRK1	Coding	Click Me	1	-0.237	154	-40.83	0	1	0	0	2372
ENST00000617612	C11orf96	Coding	Click Me	1	-0.259	146	-29.75	0	1	0	0	610
ENST00000254051	TNS4	Coding	Click Me	1	-0.206	142	-22.85	0	1	0	0	4634
ENCT00000209704	CATG00000039992.1	Coding	Click Me	1	-0.264	156	-34.48	0	1	0	0	1000
MICT00000156619	CATG00000034862.1	Coding	Click Me	1	-0.489	143	-30.69	1	0	0	0	1000
MICT00000170306	CATG00000038779.1	Coding	Click Me	2	-0.53	282	-51.89	0	2	0	0	1000
ENST00000311565	PPARD	Coding	Click Me	1	-0.291	159	-29.6	0	1	0	0	2099
ENST00000329397	PTP4A3	Coding	Click Me	1	-0.314	146	-29.31	0	1	0	0	1410
HBMT00000170004	CATG00000000429.1	Coding	Click Me	1	-0.209	143	-32.65	0	1	0	0	1000
MICT00000279148	CATG00000079201.1	Coding	Click Me	1	-0.247	151	-25.87	0	1	0	0	1000
ENST00000611864	MGAT4C	Coding	Click Me	1	-0.226	148	-19.75	0	1	0	0	23622
ENST00000426327	GATSL2	Coding	Click Me	1	-0.326	168	-30.98	0	1	0	0	6854
ENST00000262177	DNAJB6	Coding	Click Me	1	-0.344	140	-21.83	0	1	0	0	1341
MICT00000354055	CATG00000101343.1	Coding	Click Me	2	-0.567	301	-62.68	0	2	0	0	1000
ENST00000510118	RPS6KA2	Coding	Click Me	1	-0.204	157	-29.37	0	1	0	0	3374
ENST00000296490	WDR82	Coding	Click Me	1	-0.302	148	-27.43	0	1	0	0	3085
ENST00000614239	LHX1	Coding	Click Me	1	-0.487	142	-29.63	1	0	0	0	1481
ENCT00000281315	CATG00000058339.1	Coding	Click Me	1	-0.532	144	-26.75	1	0	0	0	1000
ENST00000417856	KLC2	Coding	Click Me	1	-0.292	147	-25.96	0	1	0	0	903
ENST00000392027	ALPP	Coding	Click Me	1	-0.313	156	-31.34	0	1	0	0	1094
ENST00000368592	NKX6-2	Coding	Click Me	1	-0.178	157	-22.97	0	1	0	0	1732
ENST00000220966	PYCR3	Coding	Click Me	1	-0.115	144	-25.18	0	1	0	0	2491
HBMT00000734922	CATG00000040787.1	Coding	Click Me	1	-0.216	141	-27.96	0	1	0	0	1000
HBMT00000321862	CATG00000010971.1	Coding	Click Me	1	-0.193	151	-30	0	1	0	0	518
ENST00000302625	CDK5R2	Coding	Click Me	1	-0.273	142	-32.24	0	1	0	0	1231
ENCT00000229463	CATG00000044560.1	Coding	Click Me	2	-0.475	299	-58.67	0	2	0	0	844
ENCT00000458181	CATG00000109075.1	Coding	Click Me	1	-0.277	142	-28.88	0	1	0	0	1000
ENCT00000000232	CATG00000019495.1	Coding	Click Me	1	-0.361	143	-24.15	0	1	0	0	1000
ENCT00000187132	CATG00000034518.1	Coding	Click Me	1	-0.239	141	-23.59	0	1	0	0	1000
ENST00000264819	MIER2	Coding	Click Me	1	-0.223	144	-25.1	0	1	0	0	1121
ENCT00000073980	CATG00000004584.1	Coding	Click Me	2	-0.623	291	-61.1	0	2	0	0	1000
ENST00000379198	B3GALT6	Coding	Click Me	1	-0.274	159	-34.89	0	1	0	0	1793
ENCT00000441226	CATG00000104415.1	Coding	Click Me	1	-0.254	148	-31.04	0	1	0	0	1000
ENST00000337702	TTC33	Coding	Click Me	1	-0.192	146	-22.09	0	1	0	0	4745
ENST00000304987	SIK2	Coding	Click Me	1	-0.122	169	-31.36	0	1	0	0	6724
ENST00000609480	ATP6V1FNB	Coding	Click Me	1	-0.111	147	-34.28	0	1	0	0	3269
HBMT00001266028	CATG00000090943.1	Coding	Click Me	1	-0.295	145	-26.85	0	1	0	0	1000
ENST00000375688	VWA7	Coding	Click Me	1	-0.354	145	-26.98	0	1	0	0	834
FTMT21200004401	CATG00000060901.1	Coding	Click Me	2	-0.5	285	-58.56	0	2	0	0	760
ENST00000324685	RNF40	Coding	Click Me	1	-0.202	164	-33.95	0	1	0	0	2193
ENST00000270257	GEMIN7	Coding	Click Me	1	-0.276	141	-24.87	0	1	0	0	1014
HBMT00000799578	CATG00000047891.1	Coding	Click Me	2	-0.411	292	-60.26	0	2	0	0	759
ENST00000220562	EXTL3	Coding	Click Me	1	-0.31	141	-22.87	0	1	0	0	2824
ENST00000306688	LRRC45	Coding	Click Me	1	-0.276	149	-31.33	0	1	0	0	346
ENST00000295417	FZD5	Coding	Click Me	1	-0.59	140	-33.96	1	0	0	0	4396
ENST00000310924	TBC1D16	Coding	Click Me	1	-0.198	140	-22.45	1	0	0	0	8516
ENST00000369168	FCGR1A	Coding	Click Me	1	-0.629	140	-22.58	1	0	0	0	1001
ENST00000295802	RETSAT	Coding	Click Me	1	-0.341	174	-31.34	0	1	0	0	2632
ENST00000504156	HARS	Coding	Click Me	1	-0.32	141	-27.65	0	1	0	0	1084
ENST00000374561	ID3	Coding	Click Me	1	-0.334	143	-25.29	0	1	0	0	1203
ENST00000422113	TMEM132D	Coding	Click Me	1	-0.533	143	-25.68	1	0	0	0	2149
ENST00000393825	NDUFA4L2	Coding	Click Me	1	-0.257	142	-27.07	0	1	0	0	658
ENCT00000051704	CATG00000116972.1	Coding	Click Me	2	-1.191	289	-53.84	2	0	0	0	1000
ENST00000544440	MYCBP2	Coding	Click Me	1	-0.285	147	-23.91	0	1	0	0	1933
HBMT00000538898	CATG00000027025.1	Coding	Click Me	1	-0.193	150	-29.9	0	1	0	0	591
ENST00000372336	ZCCHC24	Coding	Click Me	1	-0.125	141	-30	0	1	0	0	4020
HBMT00000817075	CATG00000050387.1	Coding	Click Me	1	-0.345	159	-25.75	0	1	0	0	622
ENST00000259467	PDCL	Coding	Click Me	1	-0.276	151	-23.17	0	1	0	0	4276
ENST00000303004	CEBPB	Coding	Click Me	1	-0.211	142	-31.3	0	1	0	0	619
ENST00000564536	AC092718.3	Coding	Click Me	1	-0.431	143	-22.25	0	1	0	0	468
ENST00000219782	MAZ	Coding	Click Me	1	-0.291	159	-29.54	0	1	0	0	1140
HBMT00001236177	CATG00000084841.1	Coding	Click Me	2	-0.519	307	-65.1	0	2	0	0	682
ENST00000322507	COL12A1	Coding	Click Me	1	-0.143	147	-35.54	0	1	0	0	2221
ENST00000393229	NTNG2	Coding	Click Me	1	-0.203	153	-30.16	0	1	0	0	2423
ENST00000268616	ZCCHC14	Coding	Click Me	1	-0.113	140	-24.6	0	1	0	0	4045
ENCT00000383043	CATG00000087855.1	Coding	Click Me	1	-0.244	140	-28.4	0	1	0	0	1000
ENST00000343483	HOXA9	Coding	Click Me	1	-0.314	146	-30.64	1	0	0	0	3077
ENCT00000358128	CATG00000080006.1	Coding	Click Me	1	-0.275	146	-28.46	0	1	0	0	1000
ENST00000335621	CFAP73	Coding	Click Me	1	-0.247	147	-28.41	0	1	0	0	587
ENCT00000382539	CATG00000087695.1	Coding	Click Me	3	-0.626	448	-87.87	0	3	0	0	1000
FTMT20600014069	CATG00000051629.1	Coding	Click Me	2	-0.553	301	-58.25	0	2	0	0	1000
FTMT28800001277	CATG00000057739.1	Coding	Click Me	1	-0.395	167	-27.54	0	1	0	0	651
ENST00000311635	FBXO31	Coding	Click Me	1	-0.259	146	-22.15	1	0	0	0	5463
ENST00000615808	GABRG3	Coding	Click Me	1	-0.225	149	-31.36	0	1	0	0	9110
ENST00000334810	ADGRD2	Coding	Click Me	1	-0.228	146	-29.13	0	1	0	0	1480
HBMT00001263604	CATG00000090465.1	Coding	Click Me	1	-0.253	140	-29.59	0	1	0	0	548
ENST00000312026	ZNF417	Coding	Click Me	1	-0.235	147	-24.99	0	1	0	0	8275
ENST00000614476	MTERF4	Coding	Click Me	1	-0.26	158	-26.84	0	1	0	0	3356
ENST00000431843	SIGIRR	Coding	Click Me	1	-0.303	148	-27.24	0	1	0	0	187
ENCT00000279909	CATG00000058070.1	Coding	Click Me	1	-0.207	141	-29.7	0	1	0	0	1000
ENST00000242784	TRIR	Coding	Click Me	1	-0.655	160	-25.67	1	0	0	0	321
ENST00000322941	HIC1	Coding	Click Me	1	-0.264	147	-29.37	0	1	0	0	851
ENST00000253008	PRDM12	Coding	Click Me	1	-0.28	145	-28.11	0	1	0	0	1328
ENST00000268766	NEK8	Coding	Click Me	1	-0.215	149	-27.95	0	1	0	0	1478
ENST00000251287	HCN2	Coding	Click Me	1	-0.2	147	-28.82	0	1	0	0	685
ENST00000311915	C12orf66	Coding	Click Me	1	-0.619	140	-22.89	1	0	0	0	1267
ENST00000396593	CARHSP1	Coding	Click Me	1	-0.204	159	-30.11	0	1	0	0	4898
ENST00000424196	EIF4G1	Coding	Click Me	1	-0.301	159	-28.25	0	1	0	0	443
ENST00000369939	KIAA1324	Coding	Click Me	1	-0.656	149	-30.95	1	0	0	0	3769
ENST00000233202	SLC11A1	Coding	Click Me	1	-0.252	145	-25.29	0	1	0	0	1862
ENST00000307201	ABHD15	Coding	Click Me	1	-0.329	159	-29.33	0	1	0	0	7071
MICT00000227401	CATG00000056958.1	Coding	Click Me	1	-0.312	153	-33.2	0	1	0	0	1000
ENST00000357385	ANAPC11	Coding	Click Me	1	-0.241	143	-35.64	0	1	0	0	433
ENST00000228284	SART3	Coding	Click Me	1	-0.318	151	-18.48	0	1	0	0	2586
ENST00000629380	SYNGAP1	Coding	Click Me	2	-0.335	304	-48.85	0	2	0	0	5635
ENST00000360001	SDF4	Coding	Click Me	1	-0.319	154	-24.9	0	1	0	0	604
ENST00000305901	ONECUT1	Coding	Click Me	1	-0.635	148	-27.06	1	0	0	0	5248
ENST00000611716	PCSK6	Coding	Click Me	1	-0.326	162	-26.27	0	1	0	0	1330
ENST00000569446	SCRT1	Coding	Click Me	1	-0.257	153	-30.54	1	0	0	0	2619
ENCT00000163601	CATG00000028653.1	Coding	Click Me	1	-0.285	149	-26.81	0	1	0	0	1000
HBMT00001079255	CATG00000071597.1	Coding	Click Me	1	-0.257	140	-21.71	0	1	0	0	792
ENST00000358201	RABEP2	Coding	Click Me	1	-0.636	165	-36.01	1	0	0	0	522
ENCT00000337405	CATG00000074073.1	Coding	Click Me	2	-0.466	292	-59.06	0	2	0	0	1000
HBMT00001163110	CATG00000080007.1	Coding	Click Me	3	-0.689	442	-88.15	0	3	0	0	538
ENST00000342480	PODXL2	Coding	Click Me	1	-0.192	142	-24.65	0	1	0	0	330
ENST00000443632	HIC2	Coding	Click Me	1	-0.174	149	-22.47	0	1	0	0	4720
ENST00000334049	GNAL	Coding	Click Me	1	-0.282	154	-31.91	0	1	0	0	4550
ENST00000398585	TMPRSS2	Coding	Click Me	1	-0.543	142	-24.18	1	0	0	0	1589
HBMT00000170729	CATG00000000482.1	Coding	Click Me	1	-0.558	143	-19.76	1	0	0	0	1000
ENST00000432992	GAS7	Coding	Click Me	1	-0.299	146	-25.99	0	1	0	0	3378
ENST00000410016	HOXD3	Coding	Click Me	2	-0.594	327	-59	0	2	0	0	811
ENST00000395965	FAM172A	Coding	Click Me	1	-0.158	144	-34.78	0	1	0	0	3262
ENST00000246553	FFAR1	Coding	Click Me	1	-0.349	156	-29.06	0	1	0	0	1489
ENST00000367734	OLIG3	Coding	Click Me	1	-0.286	140	-21.11	0	1	0	0	1153
ENST00000246657	CCR7	Coding	Click Me	1	-0.176	151	-27.17	0	1	0	0	4024
ENST00000618468	P2RY6	Coding	Click Me	1	-0.415	145	-23.07	0	1	0	0	1094
ENST00000261304	GALC	Coding	Click Me	1	-0.43	153	-24.34	0	1	0	0	1718
MICT00000114742	CATG00000024677.1	Coding	Click Me	1	-0.314	171	-30.72	0	1	0	0	1000
ENCT00000026919	CATG00000061202.1	Coding	Click Me	1	-0.265	147	-30.44	0	1	0	0	1000
ENCT00000328189	CATG00000071657.1	Coding	Click Me	2	-0.568	311	-60.09	0	2	0	0	926
ENST00000378719	SEPT8	Coding	Click Me	1	-0.349	159	-28.77	0	1	0	0	1199
FTMT22500049714	CATG00000096985.1	Coding	Click Me	1	-0.258	140	-27.15	0	1	0	0	890
ENST00000638572	ST3GAL5	Coding	Click Me	1	-0.27	165	-35.84	0	1	0	0	3024
ENST00000560371	TRAF3	Coding	Click Me	1	-0.137	140	-25.89	0	1	0	0	5716
ENST00000617752	GCSAML-AS1	Coding	Click Me	1	-0.223	152	-26.62	0	1	0	0	1416
ENST00000255087	TESMIN	Coding	Click Me	1	-0.266	144	-25.48	0	1	0	0	3506
ENST00000305817	PRND	Coding	Click Me	1	-0.603	149	-24.39	1	0	0	0	3380
ENST00000541682	HES7	Coding	Click Me	1	-0.252	140	-30.74	0	1	0	0	1273
ENST00000643399	HK1	Coding	Click Me	1	-0.659	153	-21.56	1	0	0	0	747
ENST00000330884	SULT4A1	Coding	Click Me	1	-0.302	140	-20.31	0	1	0	0	1494
ENST00000417276	FAM27D1	Coding	Click Me	1	-0.249	143	-31.86	0	1	0	0	656
ENST00000370501	NTSR1	Coding	Click Me	1	-0.171	141	-25.91	0	1	0	0	2504
ENST00000231121	HAND1	Coding	Click Me	1	-0.57	149	-22.38	1	0	0	0	834
ENST00000381176	SHISAL1	Coding	Click Me	1	-0.348	154	-25.8	0	1	0	0	6019
FTMT20200000995	CATG00000052150.1	Coding	Click Me	1	-0.272	150	-29.92	0	1	0	0	458
ENST00000315758	MDH2	Coding	Click Me	1	-0.575	159	-25.33	1	0	0	0	1099
ENCT00000079991	CATG00000006016.1	Coding	Click Me	1	-0.622	150	-31.88	1	0	0	0	1000
ENST00000372398	NCS1	Coding	Click Me	1	-0.158	165	-29.38	0	1	0	0	4332
ENST00000594030	ZNF765	Coding	Click Me	1	-0.352	167	-29.81	0	1	0	0	979
ENST00000334527	NDEL1	Coding	Click Me	1	-0.354	157	-27.6	0	1	0	0	1154
ENST00000239938	EGR1	Coding	Click Me	1	-0.71	151	-29.15	1	0	0	0	1234
MICT00000221040	CATG00000055333.1	Coding	Click Me	1	-0.321	159	-34.3	0	1	0	0	1000
HBMT00000231036	CATG00000003736.1	Coding	Click Me	3	-0.732	437	-83.87	0	2	1	0	689
ENST00000297994	TRMT10B	Coding	Click Me	1	-0.207	147	-27.67	0	1	0	0	2758
ENST00000252506	GADD45G	Coding	Click Me	1	-0.288	140	-29.36	0	1	0	0	2562
ENST00000641449	OR4D1	Coding	Click Me	1	-0.191	148	-22.9	0	1	0	0	3469
MICT00000132265	CATG00000027291.1	Coding	Click Me	1	-0.219	147	-28.35	0	1	0	0	1000
ENST00000297293	LMTK2	Coding	Click Me	1	-0.291	157	-28.59	0	1	0	0	4147
MICT00000198022	CATG00000049832.1	Coding	Click Me	1	-0.384	155	-23.87	0	1	0	0	1000
ENST00000546390	OR7E47P	Coding	Click Me	1	-0.335	153	-27.48	0	1	0	0	1056
ENCT00000245022	CATG00000049274.1	Coding	Click Me	1	-0.326	141	-24.44	0	1	0	0	798
ENST00000262367	CREBBP	Coding	Click Me	1	-0.183	143	-30.25	0	1	0	0	2664
ENCT00000076644	CATG00000005195.1	Coding	Click Me	1	-0.498	146	-29.62	1	0	0	0	1000
HBMT00000807946	CATG00000048990.1	Coding	Click Me	1	-0.204	160	-36.14	0	1	0	0	957
ENST00000396368	MARF1	Coding	Click Me	1	-0.363	163	-26.24	0	1	0	0	3139
MICT00000359999	CATG00000108425.1	Coding	Click Me	1	-0.281	163	-30.57	0	1	0	0	1000
ENST00000375559	F10	Coding	Click Me	1	-0.632	160	-26.81	1	0	0	0	4344
ENST00000375254	UBR4	Coding	Click Me	1	-0.367	145	-25.96	0	1	0	0	797
ENCT00000265279	CATG00000054414.1	Coding	Click Me	3	-0.669	457	-96.08	0	3	0	0	910
ENST00000434396	ANKRD63	Coding	Click Me	1	-0.134	143	-27.71	0	1	0	0	3073
ENST00000283426	PLEKHG4B	Coding	Click Me	1	-0.232	144	-31.28	0	1	0	0	7649
ENST00000642050	PPT1	Coding	Click Me	1	-0.31	144	-22.6	0	1	0	0	2600
ENST00000255039	HAPLN2	Coding	Click Me	1	-0.194	145	-28.8	0	1	0	0	341
ENST00000425538	MYOCD	Coding	Click Me	1	-0.256	165	-30.04	0	1	0	0	5305
ENST00000262809	ELL	Coding	Click Me	1	-0.267	161	-24.45	0	1	0	0	2121
ENST00000577830	CUEDC1	Coding	Click Me	2	-0.531	306	-68.04	0	2	0	0	2047
ENST00000393409	PLXNA1	Coding	Click Me	1	-0.239	140	-29.72	0	1	0	0	3375
ENCT00000327702	CATG00000071558.1	Coding	Click Me	1	-0.217	148	-31.47	0	1	0	0	1000
ENST00000269373	FN3KRP	Coding	Click Me	1	-0.209	140	-25.31	0	1	0	0	3667
ENST00000409185	FAM168B	Coding	Click Me	1	-0.28	148	-21.22	0	1	0	0	4589
ENST00000019317	RALBP1	Coding	Click Me	1	-0.273	141	-24.53	0	1	0	0	2177
ENST00000377022	CASZ1	Coding	Click Me	2	-0.518	285	-56.76	0	2	0	0	2338
ENST00000355035	ASGR2	Coding	Click Me	1	-0.233	146	-24.52	0	1	0	0	1412
ENST00000360085	PYY	Coding	Click Me	1	-0.26	144	-24.58	0	1	0	0	218
ENST00000594172	AL591479.1	Coding	Click Me	1	-0.295	141	-25.84	0	1	0	0	1811
ENST00000391945	ERCC2	Coding	Click Me	1	-0.348	164	-30.25	0	1	0	0	1859
ENST00000260950	MSTN	Coding	Click Me	1	-0.356	143	-21.49	0	0	1	0	1561
ENST00000356818	PPP1R26	Coding	Click Me	1	-0.356	148	-27.6	0	1	0	0	753
ENST00000203166	HAUS5	Coding	Click Me	1	-0.259	161	-26.15	0	1	0	0	2356
ENST00000244289	LIPE	Coding	Click Me	1	-0.587	142	-27.75	1	0	0	0	305
ENST00000381867	SNPH	Coding	Click Me	1	-0.333	162	-30.86	0	1	0	0	3274
ENST00000378825	CCDC3	Coding	Click Me	1	-0.766	159	-26.67	1	0	0	0	1791
HBMT00001477311	CATG00000107403.1	Coding	Click Me	1	-0.233	146	-33.38	0	1	0	0	1000
MICT00000028253	CATG00000089924.1	Coding	Click Me	1	-0.329	166	-26.98	0	1	0	0	1000
ENCT00000175321	CATG00000031471.1	Coding	Click Me	1	-0.272	165	-37.39	0	1	0	0	1000
ENST00000296238	CAMK2N2	Coding	Click Me	1	-0.243	153	-28.5	0	1	0	0	944
ENST00000219611	CAPN15	Coding	Click Me	1	-0.493	148	-22.45	1	0	0	0	1120
HBMT00000486685	CATG00000023328.1	Coding	Click Me	2	-0.715	291	-56.51	1	1	0	0	767
ENST00000279249	CDC42EP2	Coding	Click Me	1	-0.29	150	-27.04	0	1	0	0	898
HBMT00000700340	CATG00000038552.1	Coding	Click Me	1	-0.337	156	-26.21	0	1	0	0	1000
ENST00000404488	CRELD2	Coding	Click Me	1	-0.334	151	-25.62	0	1	0	0	236
HBMT00001239472	CATG00000086104.1	Coding	Click Me	1	-0.227	141	-28.58	0	1	0	0	1000
HBMT00000760479	CATG00000042163.1	Coding	Click Me	1	-0.347	148	-21.31	0	1	0	0	1000
MICT00000157214	CATG00000034911.1	Coding	Click Me	1	-0.471	141	-27.48	1	0	0	0	1000
ENST00000409960	SERF2	Coding	Click Me	1	-0.169	148	-24.72	0	1	0	0	2117
ENST00000428216	MAVS	Coding	Click Me	1	-0.17	140	-23.47	0	1	0	0	9976
ENST00000322313	WDR33	Coding	Click Me	2	-0.474	322	-60.1	1	1	0	0	5301
ENST00000329410	C16orf54	Coding	Click Me	1	-0.287	152	-31.45	0	1	0	0	1814
ENST00000371621	PTPN1	Coding	Click Me	1	-0.323	158	-28.94	0	1	0	0	2048
ENST00000422556	SPATA2	Coding	Click Me	1	-0.584	154	-28.27	1	0	0	0	2225
ENST00000392607	GPR123	Coding	Click Me	1	-0.235	146	-26.01	0	1	0	0	2164
HBMT00000658578	CATG00000035011.1	Coding	Click Me	1	-0.168	142	-29.53	0	1	0	0	1000
ENST00000404767	INTS1	Coding	Click Me	1	-0.312	148	-27.51	0	1	0	0	300
ENST00000394859	ANKRD13B	Coding	Click Me	1	-0.324	154	-24.18	0	1	0	0	1422
ENST00000383463	HMCES	Coding	Click Me	1	-0.224	142	-26.95	0	1	0	0	1374
ENST00000417934	ZBTB7B	Coding	Click Me	1	-0.225	149	-25.13	0	1	0	0	1837
ENST00000437464	ZNF469	Coding	Click Me	1	-0.261	146	-28.44	0	1	0	0	1425

## Sheet: Other-13 26-tRNA-Lys-CTT-1-M11
Predicted target genes for Other-13_26-tRNA-Lys-CTT-1-M11
# Column A: Seqname, the name the sequence.
# Column B: GeneSymbol, the official gene symbol of the sequence.
# Column C: Type, the type of the transcipt.
# Column D: Diagrams, the diagrams illustrate key features for miRNA binding. See Ref [1,2] for details.
# Column E: Total, the total number of the binding sites on the targets.
# Column F: Context+, the sum of the context+ scores used in TargetScan after version 6.0. More negative is better. See Ref [3] for details.
# Column G: Structure, the sum of the structure scores used in miRanda (Ref [4]). The higher the better.
# Column H: Energy, the sum of the free energy predicted by miRanda (Ref [4]). More negative is better.
# Column I ~ Column L: Counting numbers for different seed match types
# Reference:
[1] Grimson A., et al. MicroRNA Targeting Specificity in Mammals: Determinants beyond Seed Pairing. Molecular Cell, Volume 27, Issue 1, 91-105, 6 July 2007.
[2] Amy E. Pasquinelli. MicroRNAs and their targets: recognition, regulation and an emerging reciprocal relationship. Nature Reviews Genetics, Volume 13, 271-282, 1 April 2012.
[3] David M Garcia., et al. Weak Seed-Pairing Stability and High Target-Site Abundance Decrease the Proficiency of lsy-6 and Other miRNAs. Nat. Struct. Mol. Biol., Volume 18, 1139-1146, 2011.
[4] Enright AJ., el al. miRanda algorithm: MicroRNA targets in Drosophila. Genome Biology, Volume 5, R1, 2003.
Target genes for Other-13_26-tRNA-Lys-CTT-1-M11
Target			Sites		TargetScan	miranda		Seed match types				Annotations
Seqname	GeneSymbol	Type	Diagrams	Total	Context+	Structure	Energy	8mer-1a	7mer-m8	7mer-1a	Imperfect	UTR Length
ENST00000275493	EGFR	Coding	Click Me	1	-0.492	140	-11.4	1	0	0	0	6011
ENST00000265843	EXPH5	Coding	Click Me	1	-0.186	140	-11.32	0	1	0	0	4106
ENST00000441328	AQP1	Coding	Click Me	1	-0.268	146	-18.69	0	1	0	0	1887
FTMT20200000111	CATG00000043384.1	Coding	Click Me	1	-0.232	140	-13.45	0	1	0	0	607
ENST00000374541	PTPN3	Coding	Click Me	1	-0.396	141	-12.18	1	0	0	0	3856
MICT00000250066	CATG00000061721.1	Coding	Click Me	1	-0.346	145	-12.58	0	1	0	0	1000
ENST00000413366	PRKCA	Coding	Click Me	1	-0.213	145	-17	0	1	0	0	6727
ENST00000240285	RDH10	Coding	Click Me	1	-0.625	143	-11.22	1	0	0	0	2249
ENST00000627282	CNOT9	Coding	Click Me	1	-0.311	141	-16.69	0	1	0	0	250
ENST00000292114	TMEM199	Coding	Click Me	1	-0.306	141	-12.27	0	1	0	0	2431
uc002wly.1	AX746654	Coding	Click Me	1	-0.245	140	-15.81	0	1	0	0	1285
ENST00000477717	ST6GALNAC5	Coding	Click Me	1	-0.361	146	-14.05	0	1	0	0	3467
ENST00000551295	CNTN1	Coding	Click Me	1	-0.251	156	-18.85	0	1	0	0	2452
ENST00000302516	SF3B3	Coding	Click Me	1	-0.188	145	-12.93	0	1	0	0	5855
ENST00000343855	ZBED6CL	Coding	Click Me	1	-0.186	140	-15.73	0	1	0	0	1607
ENST00000602477	H6PD	Coding	Click Me	1	-0.212	140	-11.31	0	1	0	0	3029
ENST00000374160	LRRC18	Coding	Click Me	1	-0.251	142	-13.48	0	1	0	0	754
HBMT00000947696	CATG00000058203.1	Coding	Click Me	1	-0.233	148	-13.99	0	1	0	0	1000
ENCT00000039034	CATG00000097794.1	Coding	Click Me	1	-0.197	140	-12.77	0	1	0	0	1000
ENCT00000404978	CATG00000093881.1	Coding	Click Me	1	-0.265	143	-18.08	0	1	0	0	1000
ENST00000334889	RAX	Coding	Click Me	1	-0.268	140	-11.31	0	1	0	0	1969
ENST00000360351	MAP2	Coding	Click Me	1	-0.272	140	-11.31	0	1	0	0	3721
ENST00000327987	IGDCC3	Coding	Click Me	1	-0.257	152	-15.59	0	1	0	0	1782
ENST00000393437	LONRF2	Coding	Click Me	1	-0.222	140	-12.25	0	1	0	0	11007
FTMT27600000576	CATG00000038607.1	Coding	Click Me	1	-0.438	140	-11.31	1	0	0	0	1000
HBMT00000963638	CATG00000059127.1	Coding	Click Me	1	-0.235	152	-22.44	0	1	0	0	815
ENCT00000316001	CATG00000067498.1	Coding	Click Me	1	-0.222	140	-16.44	0	1	0	0	1000
ENST00000338779	MTSS1L	Coding	Click Me	1	-0.116	144	-11.33	0	1	0	0	2473
ENCT00000271943	CATG00000056217.1	Coding	Click Me	1	-0.531	146	-15.64	1	0	0	0	1000
ENST00000368149	ARHGAP18	Coding	Click Me	1	-0.353	152	-16.24	0	1	0	0	2985
ENST00000301761	SDHAF2	Coding	Click Me	1	-0.125	141	-13.13	0	1	0	0	3990
ENST00000381020	CDX2	Coding	Click Me	1	-0.102	144	-20.05	0	1	0	0	3500
ENST00000361272	CNOT7	Coding	Click Me	1	-0.346	156	-18.85	0	1	0	0	3996
ENST00000292841	ZNF585A	Coding	Click Me	1	-0.122	143	-17.27	0	1	0	0	6049
ENST00000409611	AQP1	Coding	Click Me	1	-0.314	146	-18.69	0	1	0	0	365
ENST00000261530	GPATCH2L	Coding	Click Me	1	-0.131	142	-11.64	0	1	0	0	12492
HBMT00001475324	CATG00000107270.1	Coding	Click Me	2	-0.453	290	-28.99	0	2	0	0	1000
ENST00000401878	RBM33	Coding	Click Me	1	-0.123	150	-18.86	0	1	0	0	6438
ENST00000309680	KRT2	Coding	Click Me	1	-0.233	144	-11.64	0	1	0	0	461
ENST00000349139	WDR3	Coding	Click Me	1	-0.18	144	-13.09	0	1	0	0	7095
ENST00000382895	NSD2	Coding	Click Me	1	-0.201	144	-16.06	0	1	0	0	3301
MICT00000148809	CATG00000031515.1	Coding	Click Me	1	-0.237	140	-11.31	0	1	0	0	1000
ENST00000610283	DPF3	Coding	Click Me	1	-0.21	140	-12.44	0	1	0	0	2975
ENST00000376112	ID1	Coding	Click Me	1	-0.376	141	-16.84	0	1	0	0	1250
FTMT28000001496	CATG00000052900.1	Coding	Click Me	1	-0.441	145	-12.67	1	0	0	0	1000
ENCT00000473665	CATG00000112857.1	Coding	Click Me	2	-0.479	287	-25.06	0	2	0	0	1000
MICT00000368111	CATG00000107272.1	Coding	Click Me	1	-0.307	148	-14.51	0	1	0	0	1000
ENST00000256429	MBD2	Coding	Click Me	1	-0.309	148	-13.32	0	1	0	0	3723
ENST00000301280	CHAF1A	Coding	Click Me	1	-0.371	140	-13.23	0	1	0	0	372
ENST00000221847	EBI3	Coding	Click Me	1	-0.297	140	-11.51	0	1	0	0	443
ENST00000521180	ST3GAL1	Coding	Click Me	1	-0.507	148	-16.82	1	0	0	0	4911
ENST00000389100	RNF180	Coding	Click Me	1	-0.302	151	-14.78	0	1	0	0	3055
ENCT00000285606	CATG00000059181.1	Coding	Click Me	1	-0.211	140	-15.82	0	1	0	0	1000
ENST00000264930	SLC12A7	Coding	Click Me	1	-0.146	140	-11.84	0	1	0	0	1986
ENST00000587539	ZNF404	Coding	Click Me	1	-0.226	141	-12.27	0	1	0	0	2868
MICT00000050795	CATG00000001185.1	Coding	Click Me	1	-0.296	141	-12.27	0	1	0	0	1000
ENST00000435030	KIF5C	Coding	Click Me	1	-0.196	142	-11.64	0	1	0	0	3689
ENST00000366898	PRKN	Coding	Click Me	1	-0.194	155	-17.48	0	1	0	0	2690
HBMT00000315076	CATG00000010356.1	Coding	Click Me	1	-0.328	141	-16.69	0	1	0	0	1000
ENST00000256996	DDB2	Coding	Click Me	1	-0.267	145	-18.07	0	1	0	0	852
ENST00000334062	RASA3	Coding	Click Me	1	-0.299	148	-14.15	0	1	0	0	1564
ENST00000422003	TBCEL	Coding	Click Me	1	-0.304	141	-12.27	0	1	0	0	4984
ENCT00000424376	CATG00000098647.1	Coding	Click Me	1	-0.576	140	-11.22	1	0	0	0	1000
ENST00000618847	CHST9	Coding	Click Me	1	-0.198	140	-16.83	0	1	0	0	9778
MICT00000095721	CATG00000015176.1	Coding	Click Me	1	-0.277	147	-12.51	0	1	0	0	1000
MICT00000235724	CATG00000058862.1	Coding	Click Me	1	-0.261	140	-15.82	0	1	0	0	1000
MICT00000222194	CATG00000053966.1	Coding	Click Me	1	-0.241	145	-18.67	0	1	0	0	1000
ENST00000315475	ZNF354C	Coding	Click Me	1	-0.193	148	-18.26	0	1	0	0	3440
ENST00000367619	SOAT1	Coding	Click Me	1	-0.455	140	-11.42	1	0	0	0	5039
ENST00000522111	TRNP1	Coding	Click Me	1	-0.245	142	-16.04	0	1	0	0	4155
HBMT00000388877	CATG00000016282.1	Coding	Click Me	1	-0.475	140	-11.31	1	0	0	0	1000
ENST00000357084	ATP2A1	Coding	Click Me	1	-0.246	142	-18.61	0	1	0	0	304
ENST00000447654	HMGA1	Coding	Click Me	1	-0.438	140	-12.33	1	0	0	0	1346
ENST00000312006	GAL3ST3	Coding	Click Me	1	-0.154	148	-20.22	0	1	0	0	1742
ENST00000374012	PHF20	Coding	Click Me	1	-0.303	140	-15.91	0	1	0	0	2754
ENST00000380956	IRF4	Coding	Click Me	1	-0.212	140	-12.25	0	1	0	0	3849
ENST00000366672	GALNT2	Coding	Click Me	1	-0.231	142	-16.15	0	1	0	0	4816
ENST00000381578	SHOX	Coding	Click Me	1	-0.266	140	-12.44	0	1	0	0	2187
ENST00000391959	PPP1R12B	Coding	Click Me	1	-0.171	140	-11.53	0	1	0	0	12146
ENST00000637493	FAM240B	Coding	Click Me	1	-0.326	146	-15.35	0	1	0	0	513
ENST00000296702	TCERG1	Coding	Click Me	1	-0.313	151	-17.23	1	0	0	0	2699
ENST00000558939	TLE3	Coding	Click Me	1	-0.273	140	-11.31	0	1	0	0	2307
MICT00000118072	CATG00000023300.1	Coding	Click Me	1	-0.235	144	-20.52	0	1	0	0	1000
ENST00000543887	AC019294.1	Coding	Click Me	1	-0.237	144	-23.39	0	1	0	0	574
ENST00000542230	TMEM50B	Coding	Click Me	1	-0.256	146	-18.46	0	1	0	0	1733
ENST00000274000	AP1AR	Coding	Click Me	1	-0.325	145	-13.4	1	0	0	0	4314
ENST00000409852	NPPC	Coding	Click Me	1	-0.297	144	-13.25	0	1	0	0	516
MICT00000278098	CATG00000079024.1	Coding	Click Me	1	-0.326	152	-20.78	0	1	0	0	1000
ENST00000377574	SLC22A12	Coding	Click Me	1	-0.25	143	-12.37	0	1	0	0	797
MICT00000315218	CATG00000086911.1	Coding	Click Me	1	-0.224	140	-11.4	0	1	0	0	1000
ENST00000409085	AAK1	Coding	Click Me	1	-0.123	140	-18.43	0	1	0	0	17874
ENST00000371795	IFIT5	Coding	Click Me	1	-0.375	146	-14.02	1	0	0	0	2354
ENST00000320580	PACS1	Coding	Click Me	1	-0.129	147	-19	0	1	0	0	5014
ENST00000251170	SEC14L5	Coding	Click Me	1	-0.132	140	-15.74	0	1	0	0	4188
ENST00000248071	KLF2	Coding	Click Me	2	-0.332	294	-29.27	1	1	0	0	6306
ENST00000298622	JAKMIP3	Coding	Click Me	1	-0.215	144	-23.44	0	1	0	0	3953
ENST00000294753	ZNF496	Coding	Click Me	1	-0.114	142	-11.4	0	1	0	0	3107
ENST00000221476	CKM	Coding	Click Me	1	-0.254	143	-18.13	0	1	0	0	337
ENST00000370823	MTG2	Coding	Click Me	1	-0.296	144	-17.26	0	1	0	0	1916
ENST00000306077	TMEM43	Coding	Click Me	1	-0.361	146	-14.05	0	1	0	0	3377
ENST00000538168	ST8SIA5	Coding	Click Me	2	-0.27	281	-23.79	0	2	0	0	12221
MICT00000087055	CATG00000010520.1	Coding	Click Me	1	-0.543	140	-11.23	1	0	0	0	1000
ENST00000354377	ZNF774	Coding	Click Me	1	-0.294	140	-11.4	0	1	0	0	1564
ENST00000375442	TSPYL2	Coding	Click Me	1	-0.264	140	-12.42	0	1	0	0	607
HBMT00000031857	CATG00000020723.1	Coding	Click Me	1	-0.228	146	-16.34	0	1	0	0	1000
ENST00000640345	AC092718.8	Coding	Click Me	1	-0.267	145	-12.93	0	1	0	0	2292
MICT00000245674	CATG00000065115.1	Coding	Click Me	1	-0.465	140	-11.22	1	0	0	0	1000
HBMT00000424055	CATG00000018214.1	Coding	Click Me	1	-0.292	140	-16.32	0	1	0	0	985
ENST00000320095	METRNL	Coding	Click Me	1	-0.241	144	-16.06	0	1	0	0	873
MICT00000222548	CATG00000055461.1	Coding	Click Me	1	-0.247	140	-13	0	1	0	0	1000
ENST00000458420	CLSTN2	Coding	Click Me	1	-0.109	150	-16.61	0	1	0	0	11999
ENST00000264758	ADD1	Coding	Click Me	1	-0.287	140	-11.49	0	1	0	0	1550
FTMT21200002522	CATG00000060036.1	Coding	Click Me	1	-0.531	142	-14.19	1	0	0	0	1000
HBMT00001543395	CATG00000112840.1	Coding	Click Me	1	-0.201	140	-11.9	0	1	0	0	1000
ENST00000427177	SEPT9	Coding	Click Me	1	-0.162	143	-18.13	0	1	0	0	1934
ENST00000396385	MPV17L	Coding	Click Me	1	-0.227	144	-11.64	0	1	0	0	5335
ENST00000373091	GRIK3	Coding	Click Me	1	-0.142	147	-17.39	0	1	0	0	6324
ENST00000418473	AGTR1	Coding	Click Me	1	-0.37	144	-13.57	0	1	0	0	886
ENST00000308167	ELF4	Coding	Click Me	1	-0.264	140	-11.32	0	1	0	0	1793
ENST00000612311	TMCO1	Coding	Click Me	1	-0.283	140	-13.04	0	1	0	0	3730
ENST00000371571	KCNG1	Coding	Click Me	1	-0.207	140	-12.04	0	1	0	0	383
FTMT22800003294	CATG00000092374.1	Coding	Click Me	1	-0.231	140	-11.4	0	1	0	0	1000
ENST00000282032	ARL14EP	Coding	Click Me	1	-0.337	140	-11.22	1	0	0	0	3099
ENST00000358671	FCGR2B	Coding	Click Me	1	-0.292	140	-15.73	0	1	0	0	1101
FTMT21500051363	CATG00000067666.1	Coding	Click Me	1	-0.554	141	-12.66	1	0	0	0	663
ENST00000300258	TCP10L	Coding	Click Me	1	-0.365	145	-18.02	0	1	0	0	1933
ENST00000367142	NUCKS1	Coding	Click Me	1	-0.186	140	-11.31	0	1	0	0	5461
ENST00000229340	RAB35	Coding	Click Me	1	-0.226	147	-15.82	0	1	0	0	2150
ENST00000012049	QPCTL	Coding	Click Me	1	-0.174	140	-12.28	0	1	0	0	4655
ENST00000326446	ARL6IP6	Coding	Click Me	1	-0.341	146	-13.95	1	0	0	0	2554
ENST00000331251	NPBWR1	Coding	Click Me	1	-0.244	140	-11.31	0	1	0	0	2835
ENST00000448921	SERPINA1	Coding	Click Me	1	-0.343	145	-17.6	0	1	0	0	1702
ENST00000279488	DUSP6	Coding	Click Me	1	-0.265	140	-15.74	0	1	0	0	2022
ENST00000298573	DUSP16	Coding	Click Me	1	-0.138	140	-11.32	0	1	0	0	4160
ENST00000360835	SCUBE1	Coding	Click Me	1	-0.236	140	-17.91	0	1	0	0	6732
ENST00000294016	ADCY9	Coding	Click Me	1	-0.381	140	-15.73	0	1	0	0	3126
ENST00000423059	THSD7A	Coding	Click Me	1	-0.379	155	-21.9	0	1	0	0	5437
ENST00000373874	TGIF2	Coding	Click Me	1	-0.283	140	-11.31	0	1	0	0	3050
ENST00000613322	AIFM2	Coding	Click Me	1	-0.444	143	-13.62	1	0	0	0	1908
FTMT24900023073	CATG00000017092.1	Coding	Click Me	1	-0.297	140	-11.31	0	1	0	0	1000
ENST00000336600	C6orf223	Coding	Click Me	1	-0.228	146	-15.82	0	1	0	0	4483
ENST00000343242	MAFK	Coding	Click Me	1	-0.175	143	-15	0	1	0	0	2668
ENST00000238667	FLVCR2	Coding	Click Me	1	-0.212	145	-13.6	0	1	0	0	1697
ENST00000539247	ARMCX6	Coding	Click Me	1	-0.355	148	-14.43	0	1	0	0	592
ENST00000254846	KDM6B	Coding	Click Me	1	-0.233	146	-15.35	0	1	0	0	1279
ENCT00000371565	CATG00000083638.1	Coding	Click Me	1	-0.231	140	-11.31	0	1	0	0	1000
ENST00000641868	OR2M4	Coding	Click Me	1	-0.191	145	-12.58	0	1	0	0	4815
ENCT00000169751	CATG00000030303.1	Coding	Click Me	1	-0.273	140	-12.53	0	1	0	0	1000
ENCT00000263490	CATG00000053945.1	Coding	Click Me	1	-0.187	140	-11.68	0	1	0	0	1000
MICT00000166515	CATG00000038289.1	Coding	Click Me	1	-0.252	143	-12.98	0	1	0	0	1000
ENST00000357949	SERTAD1	Coding	Click Me	1	-0.513	140	-13.98	1	0	0	0	1244
ENST00000259089	BLK	Coding	Click Me	1	-0.212	148	-17.94	0	1	0	0	496
ENST00000296522	HPGD	Coding	Click Me	1	-0.298	152	-15.54	0	1	0	0	2783
ENST00000373659	ZBTB6	Coding	Click Me	1	-0.253	140	-11.31	0	1	0	0	2748
HBMT00001308759	CATG00000091671.1	Coding	Click Me	1	-0.406	140	-11.59	1	0	0	0	983
ENST00000320248	KBTBD11	Coding	Click Me	1	-0.183	140	-11.59	0	1	0	0	3879
ENST00000357586	AP1B1	Coding	Click Me	1	-0.172	144	-17.16	0	1	0	0	1153
uc010oki.2	AL451062.3	Coding	Click Me	1	-0.428	144	-12.75	1	0	0	0	1282
ENST00000406902	GRAMD4	Coding	Click Me	1	-0.156	142	-18.07	0	1	0	0	2534
ENST00000254337	DCAF15	Coding	Click Me	1	-0.26	142	-18.31	0	1	0	0	545
ENST00000376741	SP2	Coding	Click Me	1	-0.2	142	-11.49	0	1	0	0	3901
ENCT00000202226	CATG00000038628.1	Coding	Click Me	1	-0.2	143	-15.47	0	1	0	0	1000
ENCT00000466038	CATG00000110901.1	Coding	Click Me	1	-0.313	142	-11.49	0	1	0	0	1000
ENST00000403625	MAST4	Coding	Click Me	1	-0.25	148	-18.78	0	1	0	0	2544
ENST00000441463	PDK3	Coding	Click Me	1	-0.167	140	-11.31	0	1	0	0	11318
ENST00000287814	TIMP4	Coding	Click Me	1	-0.203	146	-15.35	0	1	0	0	4870
ENST00000267615	ITPK1	Coding	Click Me	1	-0.138	140	-16.1	0	1	0	0	4647
ENST00000512369	DAPP1	Coding	Click Me	1	-0.613	140	-11.31	1	0	0	0	2004
ENST00000336078	ZNF532	Coding	Click Me	1	-0.169	142	-11.64	0	1	0	0	2014
ENST00000398812	GRB10	Coding	Click Me	1	-0.356	144	-19.96	1	0	0	0	2902
ENST00000337852	SUV39H1	Coding	Click Me	1	-0.241	140	-12.44	0	1	0	0	1440
MICT00000051362	CATG00000116938.1	Coding	Click Me	1	-0.229	151	-14.78	0	1	0	0	1000
ENST00000521089	WWC1	Coding	Click Me	1	-0.393	140	-11.31	0	1	0	0	199
ENST00000361479	MPHOSPH8	Coding	Click Me	1	-0.272	140	-15.92	0	1	0	0	1584
ENST00000378024	AHNAK	Coding	Click Me	1	-0.262	140	-15.82	0	1	0	0	842
MICT00000155430	CATG00000032523.1	Coding	Click Me	1	-0.235	148	-13.97	0	1	0	0	1000
HBMT00000607830	CATG00000032100.1	Coding	Click Me	1	-0.319	156	-17.86	0	1	0	0	1000
ENST00000430069	TBL1XR1	Coding	Click Me	1	-0.569	140	-11.23	1	0	0	0	6143
ENST00000335071	FOXE3	Coding	Click Me	1	-0.268	152	-20.01	0	1	0	0	777
uc003krn.1	AX747550	Coding	Click Me	1	-0.297	140	-11.31	0	1	0	0	828
HBMT00000170004	CATG00000000429.1	Coding	Click Me	1	-0.313	142	-11.89	0	1	0	0	1000
ENST00000360409	NRP2	Coding	Click Me	1	-0.144	140	-11.4	0	1	0	0	3075
MICT00000221720	CATG00000053936.1	Coding	Click Me	1	-0.275	152	-15.59	0	1	0	0	1000
ENST00000254963	HSPA12B	Coding	Click Me	1	-0.197	147	-12.51	0	1	0	0	945
ENST00000264717	GCKR	Coding	Click Me	1	-0.376	151	-17.84	0	1	0	0	245
ENST00000452089	PILRB	Coding	Click Me	1	-0.286	141	-16.69	0	1	0	0	454
ENST00000306117	KCNS1	Coding	Click Me	1	-0.48	146	-16.11	1	0	0	0	2561
ENST00000335350	UNC5B	Coding	Click Me	1	-0.165	140	-20.74	0	1	0	0	3601
ENST00000642319	ACBD6	Coding	Click Me	1	-0.28	140	-15.83	0	1	0	0	3572
HBMT00000945482	CATG00000057993.1	Coding	Click Me	1	-0.552	142	-13.65	1	0	0	0	1000
ENST00000331203	FBLN7	Coding	Click Me	1	-0.217	140	-15.95	0	1	0	0	4698
ENST00000351817	NKX2-4	Coding	Click Me	1	-0.298	140	-11.73	0	1	0	0	1111
ENST00000243253	SEC61A1	Coding	Click Me	1	-0.109	144	-11.64	0	1	0	0	2021
ENST00000177694	TBX21	Coding	Click Me	1	-0.573	140	-11.31	1	0	0	0	753
ENCT00000000232	CATG00000019495.1	Coding	Click Me	1	-0.198	143	-17.52	0	1	0	0	1000
ENCT00000012768	CATG00000020670.1	Coding	Click Me	3	-0.755	438	-42.26	0	3	0	0	1000
HBMT00000043737	CATG00000033941.1	Coding	Click Me	1	-0.316	156	-17.86	0	1	0	0	1000
ENST00000231721	SEMA3G	Coding	Click Me	1	-0.184	141	-12.75	0	1	0	0	2552
MICT00000235293	CATG00000057919.1	Coding	Click Me	1	-0.178	140	-12.78	0	1	0	0	1000
MICT00000317204	CATG00000091028.1	Coding	Click Me	1	-0.281	151	-16.85	0	1	0	0	1000
ENST00000253048	ZC3H4	Coding	Click Me	1	-0.288	140	-12.28	0	1	0	0	2169
ENST00000239906	FAM53C	Coding	Click Me	1	-0.243	141	-13.62	0	1	0	0	3997
ENST00000401850	A4GALT	Coding	Click Me	1	-0.352	140	-16.67	0	1	0	0	775
ENST00000400919	FAAP20	Coding	Click Me	1	-0.232	143	-14.01	0	1	0	0	3473
ENST00000310926	SLCO2A1	Coding	Click Me	1	-0.247	140	-11.4	0	1	0	0	2017
ENST00000314032	UCP3	Coding	Click Me	1	-0.178	142	-11.79	0	1	0	0	1996
ENST00000371935	REXO4	Coding	Click Me	1	-0.251	156	-24.71	0	1	0	0	894
ENCT00000299154	CATG00000063458.1	Coding	Click Me	1	-0.26	145	-13.49	0	1	0	0	1000
HBMT00000662962	CATG00000035909.1	Coding	Click Me	2	-0.511	287	-24.2	0	2	0	0	1000
ENST00000263593	SIAE	Coding	Click Me	1	-0.153	140	-11.32	0	1	0	0	3838
ENCT00000288593	CATG00000060044.1	Coding	Click Me	1	-0.322	143	-11.31	0	1	0	0	646
ENST00000374201	FRMPD2	Coding	Click Me	1	-0.294	146	-13.77	0	1	0	0	764
ENCT00000426183	CATG00000099282.1	Coding	Click Me	1	-0.29	147	-16.02	0	1	0	0	1000
ENST00000300571	GPRC5B	Coding	Click Me	1	-0.244	140	-18.39	0	1	0	0	3757
FTMT27400000639	CATG00000040303.1	Coding	Click Me	1	-0.19	140	-17.25	0	1	0	0	794
ENST00000397885	PUM3	Coding	Click Me	1	-0.468	150	-18.6	1	0	0	0	1246
ENST00000221922	CCDC9	Coding	Click Me	1	-0.186	141	-12.3	0	1	0	0	2155
ENST00000371942	REXO4	Coding	Click Me	1	-0.251	156	-24.71	0	1	0	0	928
ENST00000269195	GALNT1	Coding	Click Me	1	-0.601	140	-11.22	1	0	0	0	3616
ENST00000329903	CNGA2	Coding	Click Me	1	-0.477	140	-11.31	1	0	0	0	1066
ENST00000333337	OLIG2	Coding	Click Me	1	-0.255	144	-11.39	0	1	0	0	1362
ENST00000374518	BMS1	Coding	Click Me	1	-0.29	145	-12.58	0	1	0	0	3841
ENST00000367959	FCRLA	Coding	Click Me	1	-0.301	140	-11.4	0	1	0	0	972
ENST00000269389	SECTM1	Coding	Click Me	1	-0.311	140	-11.31	0	1	0	0	1137
ENST00000246104	SCRT2	Coding	Click Me	1	-0.107	140	-15.74	0	1	0	0	2075
ENST00000303714	ANTXR1	Coding	Click Me	1	-0.168	140	-11.89	0	1	0	0	3842
ENST00000302783	TTC36	Coding	Click Me	1	-0.209	146	-15.35	0	1	0	0	281
ENST00000298542	FRMD7	Coding	Click Me	1	-0.357	146	-14.04	0	1	0	0	877
HBMT00001347626	CATG00000097078.1	Coding	Click Me	1	-0.243	140	-15.93	0	1	0	0	1000
ENST00000436874	VEZT	Coding	Click Me	1	-0.18	151	-14.78	0	1	0	0	4654
ENST00000641627	OR1M1	Coding	Click Me	1	-0.267	144	-17.23	0	1	0	0	1483
ENST00000338754	TPST2	Coding	Click Me	1	-0.18	140	-11.37	0	1	0	0	4285
ENST00000406797	PRKAR1B	Coding	Click Me	1	-0.25	152	-18.02	0	1	0	0	1232
ENCT00000401115	CATG00000092679.1	Coding	Click Me	1	-0.226	140	-15.74	0	1	0	0	942
ENCT00000133492	CATG00000021028.1	Coding	Click Me	1	-0.207	141	-18.88	0	1	0	0	1000
MICT00000303276	CATG00000083821.1	Coding	Click Me	1	-0.352	147	-13.37	0	1	0	0	1000
HBMT00000710293	CATG00000039310.1	Coding	Click Me	1	-0.281	140	-16.18	0	1	0	0	1000
ENST00000353442	LMBR1	Coding	Click Me	1	-0.195	140	-12.95	0	1	0	0	6287
ENCT00000352323	CATG00000078334.1	Coding	Click Me	1	-0.529	144	-14.22	1	0	0	0	1000
ENST00000501748	ZNF623	Coding	Click Me	1	-0.233	140	-16.94	0	1	0	0	4934
ENST00000318445	SLCO3A1	Coding	Click Me	1	-0.268	140	-11.4	0	1	0	0	2772
ENST00000419235	DUSP22	Coding	Click Me	1	-0.217	148	-12.58	0	1	0	0	2404
ENCT00000451796	CATG00000107372.1	Coding	Click Me	1	-0.192	140	-16.88	0	1	0	0	1000
ENST00000566228	SNX29	Coding	Click Me	1	-0.28	140	-11.4	0	1	0	0	5660
ENST00000509504	AC004691.2	Coding	Click Me	1	-0.268	146	-18.69	0	1	0	0	1887
ENST00000261196	SLCO1B3	Coding	Click Me	1	-0.269	140	-11.31	0	1	0	0	3549
ENST00000284987	ADAMTS5	Coding	Click Me	1	-0.15	140	-17.65	0	1	0	0	8683
ENST00000396077	ZNF445	Coding	Click Me	1	-0.205	152	-16.58	0	1	0	0	14855
ENST00000301365	TRPV3	Coding	Click Me	1	-0.261	141	-12.27	0	1	0	0	3416
ENST00000262982	CSE1L	Coding	Click Me	1	-0.198	142	-13.65	0	1	0	0	4509
MICT00000181230	CATG00000041437.1	Coding	Click Me	1	-0.223	140	-11.39	0	1	0	0	1000
ENST00000551765	GATC	Coding	Click Me	1	-0.328	140	-16.86	0	1	0	0	3794
FTMT28000003326	CATG00000053951.1	Coding	Click Me	1	-0.254	140	-12.46	0	1	0	0	912
ENCT00000465331	CATG00000110659.1	Coding	Click Me	1	-0.503	143	-13.23	1	0	0	0	1000
MICT00000047960	CATG00000116287.1	Coding	Click Me	1	-0.314	148	-13.86	0	1	0	0	1000
ENST00000569446	SCRT1	Coding	Click Me	1	-0.282	140	-11.31	0	1	0	0	2619
ENST00000215781	OSM	Coding	Click Me	1	-0.219	140	-13.9	0	1	0	0	1054
ENST00000259605	RNF38	Coding	Click Me	1	-0.328	155	-17.51	0	1	0	0	3356
ENST00000314392	DPM2	Coding	Click Me	1	-0.239	143	-19.22	0	1	0	0	627
MICT00000254694	CATG00000062846.1	Coding	Click Me	2	-0.754	287	-24.29	1	1	0	0	1000
ENST00000290552	IRX6	Coding	Click Me	1	-0.25	142	-11.49	0	1	0	0	455
ENST00000393218	LGMN	Coding	Click Me	1	-0.269	144	-17.25	0	1	0	0	475
ENST00000609713	KCNJ6	Coding	Click Me	1	-0.162	150	-16.67	0	1	0	0	17783
MICT00000296176	CATG00000082420.1	Coding	Click Me	1	-0.375	147	-14.58	0	1	0	0	1000
ENST00000280871	SLC2A13	Coding	Click Me	1	-0.312	145	-13.23	1	0	0	0	5005
ENST00000288014	THTPA	Coding	Click Me	1	-0.246	144	-17.26	0	1	0	0	1462
ENST00000454838	CHID1	Coding	Click Me	1	-0.258	143	-19.98	0	1	0	0	1998
ENST00000334049	GNAL	Coding	Click Me	1	-0.233	142	-11.64	0	1	0	0	4550
ENST00000257548	USP30	Coding	Click Me	1	-0.278	140	-12.13	0	1	0	0	2095
HBMT00001544126	CATG00000112881.1	Coding	Click Me	1	-0.139	140	-11.32	0	1	0	0	1000
ENST00000269097	G6PC3	Coding	Click Me	1	-0.194	140	-11.53	0	1	0	0	2304
ENST00000261942	FAF2	Coding	Click Me	1	-0.144	143	-17.29	0	1	0	0	3124
ENST00000395348	SLC16A9	Coding	Click Me	1	-0.287	144	-20.52	0	1	0	0	2008
ENST00000233331	INO80B	Coding	Click Me	1	-0.249	140	-14.41	0	1	0	0	439
ENST00000369750	TPBG	Coding	Click Me	1	-0.314	142	-15.73	0	1	0	0	4604
ENST00000274532	TIMD4	Coding	Click Me	1	-0.363	148	-14.06	1	0	0	0	3723
ENST00000229447	IYD	Coding	Click Me	1	-0.13	140	-15.73	0	1	0	0	6492
ENST00000246657	CCR7	Coding	Click Me	1	-0.21	144	-23.27	0	1	0	0	4024
ENST00000340057	IL17A	Coding	Click Me	1	-0.485	140	-11.38	1	0	0	0	1346
HBMT00001474265	CATG00000107174.1	Coding	Click Me	1	-0.527	148	-16.77	1	0	0	0	1000
ENST00000324817	MED14	Coding	Click Me	1	-0.187	156	-18.24	0	1	0	0	3500
HBMT00000037693	CATG00000027795.1	Coding	Click Me	1	-0.279	142	-11.64	0	1	0	0	1000
ENST00000406610	PARD3B	Coding	Click Me	1	-0.151	140	-16.98	0	1	0	0	4349
ENST00000470794	LRRC75A	Coding	Click Me	1	-0.197	140	-15.73	0	1	0	0	3812
ENCT00000175321	CATG00000031471.1	Coding	Click Me	1	-0.223	144	-10.92	0	1	0	0	1000
ENST00000264039	GPC1	Coding	Click Me	1	-0.226	144	-17	0	1	0	0	1812
ENST00000264033	CBL	Coding	Click Me	1	-0.203	145	-17.6	0	1	0	0	8368
MICT00000188681	CATG00000048306.1	Coding	Click Me	1	-0.495	140	-11.23	1	0	0	0	1000
ENST00000373461	VSTM2L	Coding	Click Me	1	-0.164	140	-15.74	0	1	0	0	1097
ENCT00000161795	CATG00000028329.1	Coding	Click Me	1	-0.234	144	-15.81	0	1	0	0	1000
ENST00000372396	KDM4A	Coding	Click Me	1	-0.462	144	-12.75	1	0	0	0	1148
ENST00000310799	C11orf45	Coding	Click Me	1	-0.177	140	-15.82	0	1	0	0	2992
ENST00000311813	AQP1	Coding	Click Me	1	-0.268	146	-18.69	0	1	0	0	1887
ENST00000409899	AQP1	Coding	Click Me	1	-0.311	146	-18.69	0	1	0	0	392
ENCT00000188644	CATG00000034878.1	Coding	Click Me	1	-0.242	143	-18.13	0	1	0	0	1000
ENST00000315322	IFT22	Coding	Click Me	1	-0.287	145	-17	0	1	0	0	478
ENST00000332438	CCR10	Coding	Click Me	1	-0.298	141	-12.27	0	1	0	0	664
ENST00000278071	ITPRIP	Coding	Click Me	1	-0.403	146	-14.89	0	1	0	0	4710
ENST00000487349	ASB14	Coding	Click Me	1	-0.343	147	-12.51	0	1	0	0	1294
ENST00000381458	TGM3	Coding	Click Me	1	-0.309	140	-11.39	0	1	0	0	596
ENST00000357988	PHF8	Coding	Click Me	1	-0.268	152	-15.59	0	1	0	0	2482
ENST00000578921	RAB31	Coding	Click Me	1	-0.289	140	-17.9	0	1	0	0	3231
ENST00000441626	CNBP	Coding	Click Me	1	-0.354	140	-11.31	0	1	0	0	351
ENST00000267257	PXN	Coding	Click Me	1	-0.253	152	-17.04	0	1	0	0	1875
ENST00000322583	PRR18	Coding	Click Me	1	-0.168	140	-11.9	0	1	0	0	2150
ENST00000217381	SNTA1	Coding	Click Me	1	-0.223	152	-20.01	0	1	0	0	680
ENST00000445202	PATE3	Coding	Click Me	1	-0.367	140	-11.31	0	1	0	0	998
MICT00000061899	CATG00000005926.1	Coding	Click Me	1	-0.173	140	-12.18	0	1	0	0	1000
NM_001279350	REXO4	Coding	Click Me	1	-0.251	156	-24.71	0	1	0	0	895
ENCT00000260683	CATG00000053041.1	Coding	Click Me	1	-0.501	152	-15.97	1	0	0	0	1000
ENST00000262839	TRPC5	Coding	Click Me	1	-0.302	142	-16.06	0	1	0	0	1999
ENST00000432329	CREB1	Coding	Click Me	1	-0.106	140	-13.49	0	1	0	0	8502
ENST00000275162	CLVS2	Coding	Click Me	1	-0.39	140	-11.31	0	1	0	0	9166
ENCT00000079645	CATG00000005932.1	Coding	Click Me	1	-0.232	141	-13.55	0	1	0	0	1000
ENST00000252602	MRPL34	Coding	Click Me	1	-0.517	150	-16.52	1	0	0	0	464
MICT00000178407	CATG00000039615.1	Coding	Click Me	1	-0.533	142	-11.22	1	0	0	0	1000
ENST00000261918	SEMA7A	Coding	Click Me	1	-0.26	140	-15.95	0	1	0	0	1335
MICT00000041036	CATG00000114024.1	Coding	Click Me	1	-0.589	140	-11.22	1	0	0	0	1000
ENCT00000263627	CATG00000053975.1	Coding	Click Me	1	-0.236	152	-16.58	0	1	0	0	1000
ENST00000328546	HSD17B13	Coding	Click Me	1	-0.313	140	-12.42	0	1	0	0	1429
ENST00000335793	CDC42EP4	Coding	Click Me	1	-0.355	144	-13.16	1	0	0	0	4085
ENST00000335154	FMNL3	Coding	Click Me	1	-0.113	146	-16.34	0	1	0	0	7874
ENST00000264276	ALS2	Coding	Click Me	1	-0.19	140	-11.4	0	1	0	0	1588
ENST00000358025	SYNE2	Coding	Click Me	1	-0.349	150	-16.61	0	1	0	0	923
ENST00000393409	PLXNA1	Coding	Click Me	1	-0.17	142	-13.74	0	1	0	0	3375
ENST00000242576	UNG	Coding	Click Me	1	-0.361	144	-16.3	0	1	0	0	1024
ENST00000484457	FBXL2	Coding	Click Me	1	-0.295	141	-12.37	0	1	0	0	2484
ENST00000290167	WNT4	Coding	Click Me	1	-0.247	145	-12.58	0	1	0	0	2745
ENST00000399231	MYO5A	Coding	Click Me	1	-0.136	140	-18.34	1	0	0	0	6413
ENST00000308192	PLG	Coding	Click Me	1	-0.253	143	-17.23	0	1	0	0	1502
ENST00000381055	ADAMTS6	Coding	Click Me	1	-0.432	146	-13.96	1	0	0	0	3100
ENST00000424985	FAM71E2	Coding	Click Me	1	-0.293	140	-19.11	0	1	0	0	228
ENST00000381883	PLPP6	Coding	Click Me	1	-0.513	145	-13.46	1	0	0	0	2009
ENST00000256644	LAMTOR5	Coding	Click Me	1	-0.597	140	-11.43	1	0	0	0	270
ENST00000259154	KCTD3	Coding	Click Me	1	-0.366	146	-13.97	0	1	0	0	2386
ENST00000392288	ZNF493	Coding	Click Me	1	-0.329	145	-12.9	0	1	0	0	4033
ENST00000296736	TIGD6	Coding	Click Me	1	-0.13	145	-14.47	0	1	0	0	3763
FTMT24000007118	CATG00000116804.1	Coding	Click Me	1	-0.307	146	-16.34	0	1	0	0	1000
ENST00000409299	PXMP4	Coding	Click Me	1	-0.263	152	-21.02	0	1	0	0	4962
ENST00000370328	GABRE	Coding	Click Me	1	-0.473	140	-12.2	1	0	0	0	1577
ENCT00000097213	CATG00000010758.1	Coding	Click Me	1	-0.253	148	-18.78	0	1	0	0	1000
ENST00000381269	SLC8A3	Coding	Click Me	1	-0.341	141	-12.27	0	1	0	0	1730
ENST00000379333	SLC23A2	Coding	Click Me	1	-0.195	145	-13.32	0	1	0	0	4616
ENST00000287585	LHFPL4	Coding	Click Me	1	-0.514	147	-15.73	1	0	0	0	3869
HBMT00000696289	CATG00000038319.1	Coding	Click Me	1	-0.204	142	-11.79	0	1	0	0	1000
ENST00000409960	SERF2	Coding	Click Me	1	-0.234	146	-18.69	0	1	0	0	2117
ENST00000401088	SZRD1	Coding	Click Me	1	-0.177	140	-11.6	0	1	0	0	3002
ENST00000277570	PROSER2	Coding	Click Me	1	-0.172	147	-16.96	0	1	0	0	4095
ENST00000226578	MANBA	Coding	Click Me	1	-0.31	140	-15.81	0	1	0	0	571
ENST00000417443	SMIM10L2A	Coding	Click Me	1	-0.1	140	-11.31	0	1	0	0	4804
ENST00000318584	FKRP	Coding	Click Me	1	-0.194	140	-11.31	0	1	0	0	3480
HBMT00000047365	CATG00000039668.1	Coding	Click Me	1	-0.141	144	-14.86	0	1	0	0	855
ENST00000541970	PDCD2	Coding	Click Me	1	-0.181	140	-11.39	0	1	0	0	2771
ENST00000302909	KCNK3	Coding	Click Me	1	-0.338	141	-12.27	0	1	0	0	4852

## Sheet: Other-2 23-tRNA-Val-AAC-1-M7
Predicted target genes for Other-2_23-tRNA-Val-AAC-1-M7
# Column A: Seqname, the name the sequence.
# Column B: GeneSymbol, the official gene symbol of the sequence.
# Column C: Type, the type of the transcipt.
# Column D: Diagrams, the diagrams illustrate key features for miRNA binding. See Ref [1,2] for details.
# Column E: Total, the total number of the binding sites on the targets.
# Column F: Context+, the sum of the context+ scores used in TargetScan after version 6.0. More negative is better. See Ref [3] for details.
# Column G: Structure, the sum of the structure scores used in miRanda (Ref [4]). The higher the better.
# Column H: Energy, the sum of the free energy predicted by miRanda (Ref [4]). More negative is better.
# Column I ~ Column L: Counting numbers for different seed match types
# Reference:
[1] Grimson A., et al. MicroRNA Targeting Specificity in Mammals: Determinants beyond Seed Pairing. Molecular Cell, Volume 27, Issue 1, 91-105, 6 July 2007.
[2] Amy E. Pasquinelli. MicroRNAs and their targets: recognition, regulation and an emerging reciprocal relationship. Nature Reviews Genetics, Volume 13, 271-282, 1 April 2012.
[3] David M Garcia., et al. Weak Seed-Pairing Stability and High Target-Site Abundance Decrease the Proficiency of lsy-6 and Other miRNAs. Nat. Struct. Mol. Biol., Volume 18, 1139-1146, 2011.
[4] Enright AJ., el al. miRanda algorithm: MicroRNA targets in Drosophila. Genome Biology, Volume 5, R1, 2003.
Target genes for Other-2_23-tRNA-Val-AAC-1-M7
Target			Sites		TargetScan	miranda		Seed match types				Annotations
Seqname	GeneSymbol	Type	Diagrams	Total	Context+	Structure	Energy	8mer-1a	7mer-m8	7mer-1a	Imperfect	UTR Length
ENST00000303115	IL7R	Coding	Click Me	1	-0.134	142	-13	0	1	0	0	3117
ENST00000216639	VRK1	Coding	Click Me	1	-0.19	157	-18.41	0	1	0	0	1558
ENST00000280020	KIAA1328	Coding	Click Me	1	-0.227	153	-20.06	1	0	0	0	3097
ENST00000558401	B2M	Coding	Click Me	1	-0.193	157	-19.41	0	1	0	0	1285
ENST00000307378	SLCO1A2	Coding	Click Me	1	-0.377	154	-18.57	1	0	0	0	4948
ENST00000641196	OR6A2	Coding	Click Me	1	-0.404	159	-19.55	1	0	0	0	2989
MICT00000336584	CATG00000097573.1	Coding	Click Me	1	-0.151	142	-22.85	0	0	1	0	1000
ENST00000610343	ZMYM2	Coding	Click Me	1	-0.222	151	-15.27	0	1	0	0	5814
ENST00000284245	C16orf74	Coding	Click Me	1	-0.524	149	-16.43	1	0	0	0	491
ENST00000316554	CCDC184	Coding	Click Me	1	-0.158	142	-17.96	0	0	1	0	1219
ENST00000336564	ZNF576	Coding	Click Me	1	-0.431	159	-18.1	1	0	0	0	1942
ENST00000273963	KLHL8	Coding	Click Me	1	-0.284	152	-16.81	0	1	0	0	3638
ENST00000329627	PEX26	Coding	Click Me	1	-0.143	158	-19.98	0	1	0	0	17321
ENST00000250617	ARHGEF6	Coding	Click Me	1	-0.257	149	-14.56	0	1	0	0	2482
ENST00000391807	KLK7	Coding	Click Me	1	-0.24	146	-15.61	0	1	0	0	1063
ENST00000262971	PIAS4	Coding	Click Me	1	-0.158	159	-16.25	0	1	0	0	1511
ENST00000277517	IDI2	Coding	Click Me	1	-0.25	157	-16.71	0	1	0	0	610
ENST00000290399	SIM2	Coding	Click Me	1	-0.175	159	-17.24	0	1	0	0	3042
ENST00000347034	CAMKK2	Coding	Click Me	1	-0.383	159	-18.33	1	0	0	0	3026
ENST00000345617	HDAC4	Coding	Click Me	1	-0.216	149	-13.71	0	1	0	0	4929
ENST00000334690	TRAPPC11	Coding	Click Me	1	-0.399	146	-17	1	0	0	0	950
ENST00000389532	CAMSAP1	Coding	Click Me	1	-0.306	141	-11.68	1	0	0	0	2822
ENST00000226578	MANBA	Coding	Click Me	1	-0.257	143	-12.38	0	1	0	0	571
ENST00000522781	INSYN2	Coding	Click Me	1	-0.154	140	-18.63	0	0	1	0	2411
ENST00000446090	DCTN4	Coding	Click Me	1	-0.274	174	-24.52	0	1	0	0	291
ENST00000341376	NFYA	Coding	Click Me	1	-0.407	148	-14.14	1	0	0	0	4997
ENST00000222553	NAMPT	Coding	Click Me	1	-0.144	150	-12.53	0	1	0	0	2798
ENST00000589389	GLYR1	Coding	Click Me	1	-0.236	146	-15.31	1	0	0	0	2033
ENST00000286614	MMP16	Coding	Click Me	1	-0.188	152	-12	1	0	0	0	9452
ENST00000344337	KPNA1	Coding	Click Me	1	-0.469	148	-19.71	1	0	0	0	5084
ENST00000545289	ZNF286B	Coding	Click Me	1	-0.136	141	-13.51	1	0	0	0	3508
ENST00000601380	ANKDD1B	Coding	Click Me	1	-0.405	156	-17.43	1	0	0	0	806
ENST00000338144	ENOX2	Coding	Click Me	1	-0.208	157	-17.45	0	1	0	0	1929
ENST00000377801	PLCXD3	Coding	Click Me	1	-0.18	156	-16.01	0	1	0	0	6671
ENST00000507469	SMG7	Coding	Click Me	1	-0.577	171	-21.54	1	0	0	0	1269
ENST00000362003	PCGF3	Coding	Click Me	1	-0.193	152	-15.09	0	1	0	0	4561
ENST00000367350	KIF14	Coding	Click Me	1	-0.34	165	-23.14	1	0	0	0	1891
ENST00000264233	POLQ	Coding	Click Me	1	-0.454	161	-19.52	1	0	0	0	878
ENST00000315467	GCSH	Coding	Click Me	1	-0.416	158	-15.99	1	0	0	0	4635
ENST00000346872	IKZF3	Coding	Click Me	1	-0.136	154	-21.47	1	0	0	0	8075
ENST00000337174	CAMKK2	Coding	Click Me	1	-0.359	159	-18.33	1	0	0	0	3100
MICT00000232606	CATG00000057495.1	Coding	Click Me	1	-0.464	158	-19.13	1	0	0	0	1000
ENST00000400454	DSCAM	Coding	Click Me	1	-0.338	154	-14.96	0	1	0	0	2035
HBMT00000734922	CATG00000040787.1	Coding	Click Me	1	-0.14	157	-27.6	0	0	1	0	1000
ENST00000571846	CYB5D1	Coding	Click Me	1	-0.117	152	-17.88	1	0	0	0	4557
FTMT28700017235	CATG00000057669.1	Coding	Click Me	1	-0.156	159	-21.31	0	1	0	0	1000
MICT00000369011	CATG00000107360.1	Coding	Click Me	1	-0.395	150	-18.06	1	0	0	0	1000
ENST00000262585	DENND3	Coding	Click Me	1	-0.186	151	-15.82	0	1	0	0	1563
FTMT24000002144	CATG00000111535.1	Coding	Click Me	1	-0.302	143	-15.63	0	1	0	0	1000
ENST00000287218	ZFAND3	Coding	Click Me	1	-0.369	145	-13.47	1	0	0	0	2235
ENCT00000137452	CATG00000022093.1	Coding	Click Me	1	-0.207	146	-13.59	0	1	0	0	1000
ENST00000258991	TEX2	Coding	Click Me	1	-0.24	152	-19.1	0	1	0	0	1742
ENST00000541212	PSMD9	Coding	Click Me	1	-0.318	151	-18.06	1	0	0	0	1986
ENST00000361507	GAB2	Coding	Click Me	1	-0.15	150	-18.89	1	0	0	0	3975
ENST00000380079	STEAP4	Coding	Click Me	1	-0.242	154	-23.39	1	0	0	0	2969
ENST00000361505	PNP	Coding	Click Me	1	-0.136	156	-13.35	0	1	0	0	5350
ENST00000330560	CDCA2	Coding	Click Me	1	-0.129	154	-14.21	0	1	0	0	4043
ENST00000307407	CXCL8	Coding	Click Me	1	-0.259	152	-14.47	0	1	0	0	1252
NM_001042404	CEP170	Coding	Click Me	1	-0.359	141	-12.27	1	0	0	0	2021
ENST00000376344	C9orf64	Coding	Click Me	1	-0.457	159	-19.32	1	0	0	0	5152
ENST00000524270	SPSB2	Coding	Click Me	1	-0.163	143	-18.79	0	0	1	0	257
ENST00000369878	CNNM2	Coding	Click Me	1	-0.146	153	-16.89	0	1	0	0	13041
ENST00000405159	FAM104A	Coding	Click Me	1	-0.358	142	-13.93	1	0	0	0	2176
MICT00000077885	CATG00000008816.1	Coding	Click Me	1	-0.244	158	-21.53	0	1	0	0	1000
ENST00000641810	OR2A42	Coding	Click Me	1	-0.244	150	-15.36	0	1	0	0	3667
ENST00000258739	KDELR2	Coding	Click Me	1	-0.488	145	-13.98	1	0	0	0	2121
HBMT00000919148	CATG00000055773.1	Coding	Click Me	1	-0.206	140	-10.61	0	1	0	0	1000
ENCT00000477994	CATG00000113827.1	Coding	Click Me	1	-0.158	145	-21.22	0	0	1	0	1000
ENST00000358015	RAD23B	Coding	Click Me	1	-0.335	147	-14.95	0	1	0	0	2538
ENST00000374045	TNFSF15	Coding	Click Me	1	-0.127	145	-15.3	1	0	0	0	5817
ENST00000550785	TPCN1	Coding	Click Me	1	-0.248	155	-20.56	0	1	0	0	2509
ENST00000415673	SP140L	Coding	Click Me	1	-0.146	159	-19.41	1	0	0	0	5406
ENST00000355832	ERCC6	Coding	Click Me	2	-0.679	298	-30.08	1	1	0	0	4337
ENST00000568954	PHLPP2	Coding	Click Me	1	-0.133	151	-16.06	0	1	0	0	3966
ENST00000228928	OAS3	Coding	Click Me	1	-0.369	154	-19.12	1	0	0	0	3276
ENST00000449193	SKIDA1	Coding	Click Me	1	-0.251	147	-11.04	0	1	0	0	1618
ENST00000340855	IDS	Coding	Click Me	1	-0.149	145	-15.39	1	0	0	0	5756
ENST00000252338	FAM155B	Coding	Click Me	1	-0.108	140	-12.4	0	1	0	0	2552
ENST00000645439	CCDC82	Coding	Click Me	1	-0.249	147	-16.74	0	1	0	0	869
HBMT00001310409	CATG00000091932.1	Coding	Click Me	1	-0.16	152	-17.54	0	1	0	0	1000
ENST00000169551	TIMM21	Coding	Click Me	1	-0.521	160	-16.33	1	0	0	0	489
ENST00000640345	AC092718.8	Coding	Click Me	1	-0.244	148	-19.47	0	1	0	0	2292
ENST00000360359	ANKS1A	Coding	Click Me	1	-0.193	154	-25.45	0	0	1	0	2804
ENCT00000296543	CATG00000062558.1	Coding	Click Me	1	-0.494	164	-21.75	1	0	0	0	1000
HBMT00000945482	CATG00000057993.1	Coding	Click Me	1	-0.243	172	-17.97	0	1	0	0	1000
ENST00000366621	KCNK1	Coding	Click Me	1	-0.231	143	-17.51	0	0	1	0	5132
ENST00000230771	HARS2	Coding	Click Me	1	-0.223	164	-21.59	0	1	0	0	766
HBMT00000214267	CATG00000002036.1	Coding	Click Me	1	-0.443	156	-23.62	1	0	0	0	958
ENST00000285311	DKK2	Coding	Click Me	1	-0.179	148	-14.21	0	1	0	0	2152
ENST00000450136	TRIM32	Coding	Click Me	1	-0.262	149	-11.98	0	1	0	0	1594
ENST00000390665	PPP2R3B	Coding	Click Me	1	-0.272	146	-14.07	0	1	0	0	404
ENST00000287169	ZDHHC5	Coding	Click Me	1	-0.36	169	-23.47	1	0	0	0	1156
HBMT00000658578	CATG00000035011.1	Coding	Click Me	1	-0.403	166	-23.47	1	0	0	0	1000
ENST00000265026	MAP3K13	Coding	Click Me	1	-0.301	147	-15.53	1	0	0	0	6641
ENST00000284878	CXADR	Coding	Click Me	1	-0.354	155	-14.38	0	1	0	0	4472
ENST00000253115	ZNF426	Coding	Click Me	1	-0.168	150	-14.61	0	1	0	0	5179
ENST00000491002	CT45A6	Coding	Click Me	1	-0.28	161	-21.7	0	1	0	0	559
ENST00000379483	KBTBD7	Coding	Click Me	1	-0.315	157	-22.74	0	1	0	0	2372
ENST00000613488	SIK1B	Coding	Click Me	1	-0.317	154	-23.26	1	0	0	0	2218
ENST00000275364	GNA12	Coding	Click Me	1	-0.25	145	-13.27	0	1	0	0	3074
ENST00000380099	KL	Coding	Click Me	1	-0.151	142	-18.06	0	0	1	0	1959
ENST00000324774	CAMKK2	Coding	Click Me	1	-0.383	159	-18.33	1	0	0	0	3002
ENST00000265379	COL6A5	Coding	Click Me	1	-0.479	151	-15.39	1	0	0	0	884
ENST00000338682	ANKRD34B	Coding	Click Me	1	-0.237	154	-14.31	0	1	0	0	1720
ENST00000554581	AKT1	Coding	Click Me	1	-0.179	159	-19.86	0	1	0	0	3594
ENST00000392806	TMEM119	Coding	Click Me	1	-0.32	152	-20.82	1	0	0	0	1686
ENST00000274353	BHMT	Coding	Click Me	1	-0.485	158	-18.18	1	0	0	0	1174
ENST00000370763	DNAJB4	Coding	Click Me	1	-0.105	157	-15.18	0	1	0	0	8886
ENST00000448775	CLMP	Coding	Click Me	1	-0.152	147	-20.09	0	1	0	0	3696
ENST00000434457	DENND4C	Coding	Click Me	1	-0.304	153	-14.31	0	1	0	0	425
ENST00000380191	GDI2	Coding	Click Me	1	-0.165	144	-21.05	0	0	1	0	2568
ENST00000327381	XKR4	Coding	Click Me	1	-0.108	150	-17.48	1	0	0	0	17827
ENST00000358308	ARHGAP19	Coding	Click Me	1	-0.1	150	-17.22	1	0	0	0	3946
ENST00000223500	CHMP5	Coding	Click Me	1	-0.188	148	-21.28	0	0	1	0	1210
ENCT00000327138	CATG00000071295.1	Coding	Click Me	1	-0.463	162	-19.06	1	0	0	0	1000
ENST00000397764	SMIM30	Coding	Click Me	1	-0.22	146	-17.59	0	0	1	0	1490
ENST00000369577	ZNF292	Coding	Click Me	1	-0.119	149	-14.57	0	1	0	0	4124
ENST00000262424	CRISPLD2	Coding	Click Me	1	-0.282	143	-13.12	1	0	0	0	13522
ENCT00000372326	CATG00000083857.1	Coding	Click Me	1	-0.264	153	-15.55	0	1	0	0	1000
ENST00000615665	SSBP2	Coding	Click Me	1	-0.351	155	-19.93	0	1	0	0	3144
ENST00000374466	CSGALNACT2	Coding	Click Me	1	-0.173	150	-14.01	0	1	0	0	3133
ENST00000393047	NKAPD1	Coding	Click Me	1	-0.178	149	-12.3	0	1	0	0	2178
ENST00000343597	FAM111B	Coding	Click Me	1	-0.239	165	-21.83	0	1	0	0	1092
ENST00000201647	EPS8L1	Coding	Click Me	1	-0.366	147	-16.64	1	0	0	0	309
ENST00000381903	KLRC3	Coding	Click Me	1	-0.338	160	-20.97	0	1	0	0	2272
ENST00000317811	FJX1	Coding	Click Me	1	-0.28	155	-18.37	0	1	0	0	1212
ENST00000296585	ITGA2	Coding	Click Me	1	-0.131	165	-16.04	0	1	0	0	4180
ENST00000321792	RBMXL1	Coding	Click Me	1	-0.219	151	-17.31	0	1	0	0	3209
ENST00000239151	HOXB5	Coding	Click Me	1	-0.432	140	-14.03	1	0	0	0	952
ENST00000367882	TCF21	Coding	Click Me	1	-0.106	155	-15.09	0	1	0	0	4894
MICT00000238784	CATG00000059304.1	Coding	Click Me	1	-0.374	148	-15.35	1	0	0	0	1000
ENST00000381346	RDH11	Coding	Click Me	1	-0.526	151	-19.81	1	0	0	0	1545
ENST00000354258	TAP1	Coding	Click Me	1	-0.487	146	-12.74	1	0	0	0	379
ENST00000374580	BMPR2	Coding	Click Me	1	-0.161	145	-13.14	1	0	0	0	7805
MICT00000227295	CATG00000056202.1	Coding	Click Me	1	-0.467	158	-20.54	1	0	0	0	1000
ENST00000395386	PHF20L1	Coding	Click Me	1	-0.38	150	-16.08	1	0	0	0	2884
ENST00000372236	POLH	Coding	Click Me	1	-0.464	163	-22.84	1	0	0	0	5966
ENST00000369516	TSPAN2	Coding	Click Me	1	-0.137	145	-11.4	0	1	0	0	2479
ENST00000518322	FAM92A	Coding	Click Me	1	-0.224	145	-14.73	0	1	0	0	3230
ENCT00000002257	CATG00000038794.1	Coding	Click Me	1	-0.171	140	-13.69	0	1	0	0	1000
ENST00000338694	TEKT1	Coding	Click Me	1	-0.251	142	-13.42	0	0	1	0	2034
ENST00000260356	THBS1	Coding	Click Me	1	-0.206	149	-13.95	1	0	0	0	4097
ENST00000247182	SIX1	Coding	Click Me	1	-0.107	140	-21.35	0	0	1	0	2868
ENST00000321919	GLYR1	Coding	Click Me	1	-0.236	146	-15.31	1	0	0	0	2033
ENST00000381337	THUMPD1	Coding	Click Me	1	-0.461	167	-21.88	1	0	0	0	2715
ENCT00000176029	CATG00000031631.1	Coding	Click Me	1	-0.174	157	-23.42	0	1	0	0	1000
ENST00000290341	IGF2BP1	Coding	Click Me	1	-0.211	163	-16.92	0	1	0	0	6720
ENST00000371497	TSHZ2	Coding	Click Me	1	-0.226	147	-17.2	0	1	0	0	8195
ENST00000357214	SFPQ	Coding	Click Me	1	-0.124	142	-12.95	1	0	0	0	4320
ENST00000303407	BRD3	Coding	Click Me	1	-0.128	152	-16.2	0	1	0	0	3285
ENST00000325006	AHCYL2	Coding	Click Me	1	-0.301	148	-14.95	0	1	0	0	3170
ENST00000388822	METTL14	Coding	Click Me	1	-0.258	156	-20.5	1	0	0	0	5227
ENST00000205557	ABCC6	Coding	Click Me	1	-0.15	141	-15.04	0	1	0	0	1205
ENST00000339697	SERINC1	Coding	Click Me	1	-0.242	148	-15.84	0	1	0	0	8313
ENST00000261275	FAM189A1	Coding	Click Me	1	-0.21	140	-12.44	1	0	0	0	3087
ENST00000423059	THSD7A	Coding	Click Me	1	-0.526	151	-13.98	1	0	0	0	5437
MICT00000303414	CATG00000083839.1	Coding	Click Me	1	-0.222	143	-14.78	0	1	0	0	1000
ENST00000399794	RBMXL1	Coding	Click Me	1	-0.219	151	-17.31	0	1	0	0	3195
ENST00000324262	CNDP2	Coding	Click Me	1	-0.171	142	-17.83	0	0	1	0	3386
ENST00000455827	CLEC2A	Coding	Click Me	1	-0.262	152	-16.93	0	1	0	0	339
ENST00000368373	GBA	Coding	Click Me	1	-0.326	151	-10.92	0	1	0	0	3725
ENST00000337002	SEC62	Coding	Click Me	1	-0.105	147	-12.94	0	1	0	0	5313
MICT00000161230	CATG00000035680.1	Coding	Click Me	1	-0.474	149	-17.93	1	0	0	0	1000
ENST00000315190	SERTM1	Coding	Click Me	1	-0.232	150	-15.3	0	1	0	0	2437
ENST00000347077	ZNF546	Coding	Click Me	1	-0.3	147	-13	0	1	0	0	5260
ENST00000327906	PHF7	Coding	Click Me	1	-0.394	153	-16.09	1	0	0	0	4647
ENST00000307142	SYNPO2	Coding	Click Me	1	-0.538	151	-14.65	1	0	0	0	3313
ENST00000311180	PDE12	Coding	Click Me	1	-0.403	162	-18.34	1	0	0	0	6840
ENCT00000178072	CATG00000032376.1	Coding	Click Me	1	-0.144	147	-17.8	0	1	0	0	1000
ENST00000300107	CLPX	Coding	Click Me	1	-0.334	151	-18.86	0	1	0	0	2604
ENCT00000482353	CATG00000114608.1	Coding	Click Me	1	-0.284	148	-15.91	1	0	0	0	1000
ENST00000500893	ZCCHC3	Coding	Click Me	1	-0.157	143	-11.83	0	1	0	0	1523
ENST00000395715	TRPS1	Coding	Click Me	1	-0.118	167	-19.55	0	1	0	0	5527
ENST00000545955	UTY	Coding	Click Me	1	-0.283	149	-17.71	0	1	0	0	1477
ENST00000354785	FN1	Coding	Click Me	1	-0.434	146	-16.85	1	0	0	0	1101
ENST00000268607	MAP1LC3B	Coding	Click Me	1	-0.246	148	-16.21	1	0	0	0	3202
ENST00000308666	ABCD2	Coding	Click Me	1	-0.156	153	-17.3	1	0	0	0	6933
ENST00000345097	FOXN3	Coding	Click Me	1	-0.139	163	-17.03	0	1	0	0	6242
MICT00000368111	CATG00000107272.1	Coding	Click Me	1	-0.162	140	-16.18	0	1	0	0	1000
ENST00000361417	PHLDB1	Coding	Click Me	1	-0.263	167	-24.91	0	1	0	0	1215
ENST00000205402	DLD	Coding	Click Me	1	-0.249	148	-13.27	0	1	0	0	4602
ENST00000476071	NSFL1C	Coding	Click Me	1	-0.416	151	-16.53	1	0	0	0	1587
ENST00000323346	SLC17A8	Coding	Click Me	1	-0.472	155	-13.26	1	0	0	0	1900
ENST00000258975	TACO1	Coding	Click Me	1	-0.112	151	-16.92	1	0	0	0	4027
ENST00000318636	CA5B	Coding	Click Me	1	-0.106	154	-18.86	1	0	0	0	4961
ENST00000316738	EFCAB11	Coding	Click Me	1	-0.113	148	-10.74	0	1	0	0	2574
ENST00000423759	TAF1	Coding	Click Me	1	-0.415	168	-24.34	1	0	0	0	1958
ENST00000533655	DDIAS	Coding	Click Me	1	-0.442	144	-14.42	1	0	0	0	324
ENST00000292841	ZNF585A	Coding	Click Me	1	-0.102	157	-17.7	0	1	0	0	6049
ENST00000641868	OR2M4	Coding	Click Me	1	-0.227	146	-12.09	0	1	0	0	4815
MICT00000250066	CATG00000061721.1	Coding	Click Me	1	-0.371	155	-15.11	1	0	0	0	1000
ENST00000395094	ZNF747	Coding	Click Me	1	-0.141	157	-18.64	0	1	0	0	4229
ENCT00000276512	CATG00000057133.1	Coding	Click Me	1	-0.354	148	-15.75	1	0	0	0	1000
ENST00000372728	BEX1	Coding	Click Me	1	-0.493	147	-18.49	1	0	0	0	255
ENST00000355568	NEK5	Coding	Click Me	1	-0.344	146	-11.39	0	1	0	0	651
ENST00000367012	SERTAD4	Coding	Click Me	1	-0.436	148	-13.92	1	0	0	0	4518
HBMT00000553098	CATG00000028352.1	Coding	Click Me	1	-0.112	150	-18.79	0	1	0	0	1000
ENST00000264834	KLF1	Coding	Click Me	1	-0.377	142	-15.85	1	0	0	0	462
ENST00000288828	WIPI2	Coding	Click Me	1	-0.102	147	-12.22	0	1	0	0	2908
MICT00000234728	CATG00000057844.1	Coding	Click Me	1	-0.243	179	-29.66	0	1	0	0	1000
ENST00000638636	VSIG10L2	Coding	Click Me	1	-0.173	161	-17.95	0	1	0	0	2733
ENST00000366543	CEP170	Coding	Click Me	1	-0.359	141	-12.27	1	0	0	0	2021
ENST00000366542	CEP170	Coding	Click Me	1	-0.359	141	-12.27	1	0	0	0	2026
FTMT29200000673	CATG00000110325.1	Coding	Click Me	1	-0.371	153	-16.27	1	0	0	0	1000
ENST00000497301	CT45A1	Coding	Click Me	1	-0.28	161	-21.7	0	1	0	0	559
ENST00000238875	LGALSL	Coding	Click Me	1	-0.116	165	-23.11	0	1	0	0	2955
ENST00000264930	SLC12A7	Coding	Click Me	1	-0.214	149	-18.19	0	1	0	0	1986
ENST00000367075	EZR	Coding	Click Me	1	-0.421	158	-18.6	1	0	0	0	1166
ENST00000305231	UGT2B7	Coding	Click Me	1	-0.56	164	-21.61	1	0	0	0	251
ENST00000262144	WDR59	Coding	Click Me	1	-0.496	158	-15.94	1	0	0	0	2843
ENST00000273859	ATP10D	Coding	Click Me	1	-0.427	142	-12.97	1	0	0	0	2105
ENST00000342784	SYDE1	Coding	Click Me	1	-0.234	148	-12.75	0	1	0	0	1025
ENST00000367941	STX7	Coding	Click Me	1	-0.148	141	-12.04	0	1	0	0	14891
ENST00000359154	WWP2	Coding	Click Me	1	-0.198	146	-11.96	0	1	0	0	1801
ENST00000406396	KDSR	Coding	Click Me	1	-0.137	147	-13.72	1	0	0	0	4616
ENST00000388798	SPAG1	Coding	Click Me	1	-0.302	152	-14.01	0	1	0	0	880
ENST00000445323	MTMR1	Coding	Click Me	1	-0.296	148	-19.61	1	0	0	0	2442
ENST00000509578	COX7C	Coding	Click Me	1	-0.107	146	-21.24	0	0	1	0	2466
ENST00000334660	CHP1	Coding	Click Me	1	-0.138	158	-16.81	0	1	0	0	2496
ENST00000360150	ERGIC2	Coding	Click Me	1	-0.392	146	-13.29	1	0	0	0	4311
ENST00000296824	CCDC127	Coding	Click Me	1	-0.106	152	-24.7	0	0	1	0	8426
ENST00000228936	ART4	Coding	Click Me	1	-0.112	142	-13.14	0	1	0	0	3802
ENST00000503008	MARCH1	Coding	Click Me	1	-0.134	167	-20.93	0	1	0	0	4030
ENST00000422081	AC244197.3	Coding	Click Me	1	-0.149	145	-15.39	1	0	0	0	5756
ENCT00000143002	CATG00000023380.1	Coding	Click Me	1	-0.451	155	-20.82	1	0	0	0	1000
ENST00000618040	KCNN3	Coding	Click Me	1	-0.162	149	-17.71	0	1	0	0	10502
ENCT00000215081	CATG00000041032.1	Coding	Click Me	1	-0.33	154	-16.18	0	1	0	0	1000
ENST00000261292	LIPG	Coding	Click Me	1	-0.105	142	-19.83	0	0	1	0	9254
ENST00000406875	HIPK2	Coding	Click Me	1	-0.205	147	-14.75	0	1	0	0	11357
ENST00000357066	MOB3A	Coding	Click Me	1	-0.279	146	-13.81	0	1	0	0	2359
ENST00000448223	SMC6	Coding	Click Me	1	-0.232	147	-14.05	0	1	0	0	2004
ENST00000373631	CRB2	Coding	Click Me	1	-0.195	151	-18.32	0	1	0	0	1696
ENST00000254037	ZCCHC9	Coding	Click Me	1	-0.296	155	-12.34	0	1	0	0	1050
ENST00000304337	TIGD4	Coding	Click Me	1	-0.458	154	-14.84	1	0	0	0	756
ENST00000304338	PPP4R4	Coding	Click Me	1	-0.276	152	-12.55	0	1	0	0	1597
ENST00000265963	GTF2H1	Coding	Click Me	1	-0.349	146	-14.96	1	0	0	0	1175
ENST00000254719	RPA1	Coding	Click Me	1	-0.148	152	-21.35	0	1	0	0	2907
ENST00000262415	DHX8	Coding	Click Me	1	-0.329	143	-17.47	1	0	0	0	1823
ENST00000367474	SAMD5	Coding	Click Me	1	-0.113	170	-23.91	0	1	0	0	5565
ENST00000339948	ZNF648	Coding	Click Me	1	-0.475	141	-22.14	1	0	0	0	1734
ENCT00000424376	CATG00000098647.1	Coding	Click Me	1	-0.525	169	-25.01	1	0	0	0	1000
ENST00000352511	ACVR2B	Coding	Click Me	1	-0.147	168	-21.93	1	0	0	0	9810
ENST00000262715	TEP1	Coding	Click Me	1	-0.31	149	-14.49	0	1	0	0	2777
ENST00000356109	ZNF44	Coding	Click Me	1	-0.535	156	-19.35	1	0	0	0	597
ENST00000394155	FHL1	Coding	Click Me	1	-0.212	150	-15.86	0	1	0	0	1405
ENST00000301365	TRPV3	Coding	Click Me	1	-0.357	161	-16.65	1	0	0	0	3416
ENST00000358525	SLC6A20	Coding	Click Me	1	-0.26	154	-20.44	0	1	0	0	3528
ENST00000258534	DRAM1	Coding	Click Me	1	-0.198	149	-17.88	0	1	0	0	2363
ENST00000612221	SBK3	Coding	Click Me	1	-0.214	155	-18.72	0	1	0	0	190
ENST00000296632	STARD4	Coding	Click Me	1	-0.161	155	-12.65	0	1	0	0	4608
ENST00000305031	CHSY3	Coding	Click Me	1	-0.229	158	-11.54	0	1	0	0	3860
HBMT00000991570	CATG00000063206.1	Coding	Click Me	1	-0.295	149	-15.12	0	1	0	0	1000
ENCT00000145796	CATG00000024256.1	Coding	Click Me	1	-0.378	151	-20.74	1	0	0	0	1000
ENST00000380036	TEK	Coding	Click Me	1	-0.265	155	-18.09	0	1	0	0	1233
ENST00000220429	GABPB1	Coding	Click Me	1	-0.436	147	-14.49	1	0	0	0	1369
ENCT00000194708	CATG00000036613.1	Coding	Click Me	1	-0.214	151	-11.18	0	1	0	0	1000
ENST00000433060	AMOTL1	Coding	Click Me	1	-0.262	140	-18.13	0	1	0	0	5958
ENST00000323959	CSTF3	Coding	Click Me	1	-0.278	156	-11.54	0	1	0	0	503
ENST00000291539	PDE9A	Coding	Click Me	1	-0.601	151	-14.53	1	0	0	0	216
ENST00000320334	OLFML3	Coding	Click Me	1	-0.243	147	-12.48	0	1	0	0	485
ENST00000310581	TERT	Coding	Click Me	1	-0.169	153	-16.45	0	1	0	0	2210
HBMT00000321733	CATG00000010947.1	Coding	Click Me	1	-0.227	143	-15.89	0	1	0	0	1000
ENST00000616170	SH3GLB1	Coding	Click Me	1	-0.244	148	-14.32	0	1	0	0	4941
ENST00000436648	GLYR1	Coding	Click Me	1	-0.236	146	-15.31	1	0	0	0	2033
ENST00000440859	CBLL1	Coding	Click Me	1	-0.266	148	-13.58	1	0	0	0	3286
MICT00000238293	CATG00000063823.1	Coding	Click Me	1	-0.146	146	-21.82	0	0	1	0	1000
ENST00000335255	FOXK2	Coding	Click Me	1	-0.144	159	-19.42	1	0	0	0	3108
ENST00000353411	SKP1	Coding	Click Me	1	-0.229	142	-12.21	0	1	0	0	8791
ENST00000367282	GPR37L1	Coding	Click Me	1	-0.164	146	-21.79	0	0	1	0	5036
ENST00000592179	ANKRD29	Coding	Click Me	1	-0.449	152	-18.57	1	0	0	0	2300
ENST00000229238	MRPL51	Coding	Click Me	1	-0.375	145	-19.49	1	0	0	0	2069
FTMT24000007118	CATG00000116804.1	Coding	Click Me	1	-0.552	155	-19.81	1	0	0	0	1000
ENST00000270162	SIK1	Coding	Click Me	1	-0.317	154	-23.26	1	0	0	0	2258
ENST00000542579	CELF2	Coding	Click Me	1	-0.144	143	-22	0	1	0	0	6256
ENST00000409668	TMEM150A	Coding	Click Me	1	-0.357	153	-17.77	1	0	0	0	492
ENST00000253693	CAPN7	Coding	Click Me	1	-0.244	146	-15.32	0	1	0	0	4762
ENST00000389120	RNF20	Coding	Click Me	1	-0.278	196	-39.71	1	0	0	0	5226
ENST00000272638	UBXN4	Coding	Click Me	1	-0.211	146	-14.32	1	0	0	0	2176
ENST00000403662	CSF2RB	Coding	Click Me	1	-0.102	148	-24.77	0	0	1	0	1947
ENCT00000113077	CATG00000014934.1	Coding	Click Me	1	-0.459	158	-14.69	1	0	0	0	1000
ENST00000353258	GDE1	Coding	Click Me	1	-0.184	149	-14.49	0	1	0	0	5061
ENST00000318160	GREM2	Coding	Click Me	1	-0.111	151	-17.62	0	1	0	0	3396
ENST00000611712	LIG4	Coding	Click Me	1	-0.278	149	-16.71	0	1	0	0	1094
ENST00000395611	MAPK8	Coding	Click Me	1	-0.152	141	-10.94	0	1	0	0	4328
ENST00000357618	HFE	Coding	Click Me	1	-0.139	148	-13.49	0	1	0	0	4117
ENST00000418331	PTPRJ	Coding	Click Me	1	-0.277	154	-12.43	0	1	0	0	3480
ENST00000256497	EDEM1	Coding	Click Me	1	-0.467	143	-15.11	1	0	0	0	4047
ENST00000258149	MDM2	Coding	Click Me	1	-0.121	150	-16.19	1	0	0	0	10837
ENST00000309035	CTBP2	Coding	Click Me	1	-0.217	150	-19.8	0	1	0	0	580
uc009xvk.3	ARHGAP19-SLIT1	Coding	Click Me	1	-0.1	150	-17.22	1	0	0	0	3949
ENST00000281419	ASAP2	Coding	Click Me	1	-0.249	152	-20.16	0	1	0	0	2351
ENST00000392672	RAD9B	Coding	Click Me	1	-0.194	160	-21.49	0	1	0	0	2178
ENST00000360416	MYH10	Coding	Click Me	1	-0.403	166	-21.61	1	0	0	0	1599
MICT00000068912	CATG00000004063.1	Coding	Click Me	1	-0.241	152	-16.06	0	1	0	0	1000
ENST00000304414	ARL6IP1	Coding	Click Me	1	-0.305	158	-20.76	0	1	0	0	1609
ENST00000398571	USP34	Coding	Click Me	1	-0.33	148	-13.4	0	1	0	0	647
ENST00000302182	UBB	Coding	Click Me	1	-0.19	148	-19.49	0	0	1	0	2359
ENST00000375741	ARHGEF7	Coding	Click Me	2	-0.247	314	-34.35	1	1	0	0	6186
ENST00000508661	UGT2B7	Coding	Click Me	1	-0.566	164	-21.61	1	0	0	0	496
MICT00000236022	CATG00000058026.1	Coding	Click Me	1	-0.462	145	-12.02	1	0	0	0	1000
ENST00000321442	SFXN1	Coding	Click Me	1	-0.465	143	-20.96	1	0	0	0	3455
ENST00000546910	CLEC5A	Coding	Click Me	1	-0.466	144	-16.88	1	0	0	0	2747
ENST00000395334	AK4	Coding	Click Me	1	-0.11	155	-18.9	1	0	0	0	5968
HBMT00000696289	CATG00000038319.1	Coding	Click Me	1	-0.213	148	-19.66	0	1	0	0	1000
MICT00000053341	CATG00000001377.1	Coding	Click Me	1	-0.446	165	-24.54	1	0	0	0	1000
ENST00000306052	LRP8	Coding	Click Me	1	-0.22	142	-16.61	0	0	1	0	4649
ENST00000380672	BNC2	Coding	Click Me	1	-0.104	161	-20.42	0	1	0	0	9502
ENST00000430069	TBL1XR1	Coding	Click Me	1	-0.138	158	-18.85	0	1	0	0	6143
ENST00000341865	C6orf132	Coding	Click Me	1	-0.299	156	-19.35	1	0	0	0	3455
ENCT00000434997	CATG00000102401.1	Coding	Click Me	1	-0.391	160	-21.95	1	0	0	0	1000
ENST00000595607	ZNF114	Coding	Click Me	1	-0.444	149	-15.89	1	0	0	0	730
ENST00000246151	PITHD1	Coding	Click Me	1	-0.224	153	-20.96	0	1	0	0	856
ENST00000308031	ZNF471	Coding	Click Me	1	-0.492	154	-22.16	1	0	0	0	4285
ENST00000396005	SLC5A12	Coding	Click Me	1	-0.138	145	-13.35	1	0	0	0	5483
ENST00000278025	FUOM	Coding	Click Me	1	-0.378	149	-19.28	1	0	0	0	359
ENST00000269601	TXNL4A	Coding	Click Me	1	-0.29	149	-17.65	0	1	0	0	2978
ENST00000261340	CLEC2D	Coding	Click Me	1	-0.121	156	-17.26	0	1	0	0	4754
ENST00000570495	ZFP90	Coding	Click Me	1	-0.319	154	-21.4	0	1	0	0	2433
ENST00000566799	CORO2B	Coding	Click Me	1	-0.316	154	-22.97	1	0	0	0	1829
ENCT00000272151	CATG00000056264.1	Coding	Click Me	1	-0.194	142	-12.19	0	1	0	0	1000
ENST00000332439	CYB5D1	Coding	Click Me	1	-0.117	152	-17.88	1	0	0	0	4412
ENST00000418776	AC068631.2	Coding	Click Me	1	-0.253	144	-14.07	0	1	0	0	50
ENST00000369329	MAP3K7	Coding	Click Me	1	-0.377	157	-18.89	1	0	0	0	2928
ENST00000417443	SMIM10L2A	Coding	Click Me	1	-0.196	148	-16.36	1	0	0	0	4804
ENST00000226004	DUSP3	Coding	Click Me	1	-0.11	143	-13.22	1	0	0	0	6015
MICT00000368979	CATG00000107354.1	Coding	Click Me	1	-0.173	166	-23.11	0	1	0	0	1000
ENST00000330387	CREB3L2	Coding	Click Me	1	-0.297	147	-14.29	1	0	0	0	5497
ENST00000571133	RSL1D1	Coding	Click Me	1	-0.1	147	-15.99	0	1	0	0	3938
ENCT00000288593	CATG00000060044.1	Coding	Click Me	1	-0.233	149	-12.77	0	1	0	0	646
ENST00000407073	MBD5	Coding	Click Me	1	-0.154	141	-13.7	0	1	0	0	5295
FTMT26400000169	CATG00000026277.1	Coding	Click Me	1	-0.176	146	-15.54	0	1	0	0	711
ENST00000536254	ZNF567	Coding	Click Me	1	-0.307	154	-16.67	0	1	0	0	671
ENST00000376547	STK24	Coding	Click Me	1	-0.387	148	-17.13	1	0	0	0	1014
ENST00000270722	PRDM16	Coding	Click Me	1	-0.412	151	-15.67	1	0	0	0	4810
ENST00000264711	DNAJC27	Coding	Click Me	1	-0.282	146	-13	0	1	0	0	3980
ENST00000220772	SFRP1	Coding	Click Me	1	-0.152	162	-19.04	0	1	0	0	3210
ENST00000374140	RGS3	Coding	Click Me	1	-0.185	154	-16.14	0	1	0	0	790
uc003jcn.4	CR749689	Coding	Click Me	1	-0.141	152	-23.96	0	0	1	0	823
ENST00000381154	ARSD	Coding	Click Me	1	-0.116	141	-20.8	0	0	1	0	3301

## Sheet: other-14 33-tRNA-Lys-CTT-1-M2
Predicted target genes for Other-14_33-tRNA-Lys-CTT-1-M2
# Column A: Seqname, the name the sequence.
# Column B: GeneSymbol, the official gene symbol of the sequence.
# Column C: Type, the type of the transcipt.
# Column D: Diagrams, the diagrams illustrate key features for miRNA binding. See Ref [1,2] for details.
# Column E: Total, the total number of the binding sites on the targets.
# Column F: Context+, the sum of the context+ scores used in TargetScan after version 6.0. More negative is better. See Ref [3] for details.
# Column G: Structure, the sum of the structure scores used in miRanda (Ref [4]). The higher the better.
# Column H: Energy, the sum of the free energy predicted by miRanda (Ref [4]). More negative is better.
# Column I ~ Column L: Counting numbers for different seed match types
# Reference:
[1] Grimson A., et al. MicroRNA Targeting Specificity in Mammals: Determinants beyond Seed Pairing. Molecular Cell, Volume 27, Issue 1, 91-105, 6 July 2007.
[2] Amy E. Pasquinelli. MicroRNAs and their targets: recognition, regulation and an emerging reciprocal relationship. Nature Reviews Genetics, Volume 13, 271-282, 1 April 2012.
[3] David M Garcia., et al. Weak Seed-Pairing Stability and High Target-Site Abundance Decrease the Proficiency of lsy-6 and Other miRNAs. Nat. Struct. Mol. Biol., Volume 18, 1139-1146, 2011.
[4] Enright AJ., el al. miRanda algorithm: MicroRNA targets in Drosophila. Genome Biology, Volume 5, R1, 2003.
Target genes for Other-14_33-tRNA-Lys-CTT-1-M2
Target			Sites		TargetScan	miranda		Seed match types				Annotations
Seqname	GeneSymbol	Type	Diagrams	Total	Context+	Structure	Energy	8mer-1a	7mer-m8	7mer-1a	Imperfect	UTR Length
MICT00000317204	CATG00000091028.1	Coding	Click Me	1	-0.28	147	-21.7	0	1	0	0	1000
ENST00000306117	KCNS1	Coding	Click Me	1	-0.296	150	-24.15	0	1	0	0	2561
ENST00000062104	NNAT	Coding	Click Me	1	-0.506	146	-14.85	1	0	0	0	931
ENST00000180173	MTMR7	Coding	Click Me	1	-0.364	149	-14.94	1	0	0	0	3087
MICT00000015416	CATG00000008429.1	Coding	Click Me	1	-0.629	142	-14.16	1	0	0	0	1000
ENST00000315491	TUBB3	Coding	Click Me	1	-0.248	143	-20.11	0	0	1	0	296
ENST00000371795	IFIT5	Coding	Click Me	1	-0.223	152	-19.44	0	1	0	0	2354
ENST00000324817	MED14	Coding	Click Me	1	-0.17	154	-21.15	0	1	0	0	3500
ENST00000554444	TUBB3	Coding	Click Me	1	-0.248	143	-20.11	0	0	1	0	287
MICT00000051362	CATG00000116938.1	Coding	Click Me	2	-0.472	287	-45.78	0	2	0	0	1000
ENST00000320580	PACS1	Coding	Click Me	1	-0.121	146	-16.47	0	1	0	0	5014
ENST00000238156	CCDC92	Coding	Click Me	1	-0.312	152	-17.19	0	1	0	0	1431
ENST00000377075	CNNM4	Coding	Click Me	1	-0.18	142	-21.94	0	0	1	0	2494
ENST00000317357	SOBP	Coding	Click Me	1	-0.504	140	-11.78	1	0	0	0	3106
ENST00000618819	PTPN9	Coding	Click Me	1	-0.295	142	-12.02	1	0	0	0	5518
MICT00000281909	CATG00000075771.1	Coding	Click Me	1	-0.227	144	-20.47	0	1	0	0	1000
HBMT00000611233	CATG00000032482.1	Coding	Click Me	1	-0.272	140	-16.7	0	1	0	0	1000
HBMT00000232437	CATG00000003943.1	Coding	Click Me	1	-0.205	148	-17.64	0	1	0	0	1000
ENST00000248071	KLF2	Coding	Click Me	1	-0.157	148	-18.73	0	1	0	0	6306
MICT00000145285	CATG00000033368.1	Coding	Click Me	1	-0.236	140	-21.56	0	0	1	0	1000
ENST00000361722	TBKBP1	Coding	Click Me	1	-0.423	147	-18.81	1	0	0	0	1437
MICT00000250066	CATG00000061721.1	Coding	Click Me	1	-0.333	140	-16.23	0	1	0	0	1000
ENST00000413366	PRKCA	Coding	Click Me	1	-0.236	140	-17.66	0	1	0	0	6727
HBMT00000002449	CATG00000007455.1	Coding	Click Me	1	-0.24	150	-25.02	0	1	0	0	1000
ENST00000358825	PRDM10	Coding	Click Me	1	-0.598	144	-14.65	1	0	0	0	2607
ENCT00000012768	CATG00000020670.1	Coding	Click Me	1	-0.308	152	-18.93	0	1	0	0	1000
ENCT00000271921	CATG00000056197.1	Coding	Click Me	1	-0.515	155	-19.82	1	0	0	0	1000
ENCT00000073980	CATG00000004584.1	Coding	Click Me	1	-0.244	154	-21.34	0	1	0	0	1000
MICT00000029505	CATG00000033287.1	Coding	Click Me	1	-0.494	145	-15.12	1	0	0	0	1000
MICT00000154119	CATG00000032385.1	Coding	Click Me	2	-0.491	295	-33.16	0	2	0	0	1000
ENST00000296271	RHO	Coding	Click Me	1	-0.201	146	-23.06	0	0	1	0	1626
FTMT28000001496	CATG00000052900.1	Coding	Click Me	1	-0.266	141	-18.86	0	1	0	0	1000
ENST00000306077	TMEM43	Coding	Click Me	1	-0.355	149	-21.09	0	1	0	0	3377
MICT00000301344	CATG00000083541.1	Coding	Click Me	1	-0.301	147	-16.26	0	1	0	0	794
ENST00000264033	CBL	Coding	Click Me	1	-0.195	148	-24.42	0	1	0	0	8368
ENST00000477717	ST6GALNAC5	Coding	Click Me	1	-0.402	141	-14.65	0	1	0	0	3467
ENST00000306954	GON7	Coding	Click Me	1	-0.327	140	-12.21	0	1	0	0	2722
ENST00000551295	CNTN1	Coding	Click Me	1	-0.258	153	-19.45	0	1	0	0	2452
HBMT00000345314	CATG00000013851.1	Coding	Click Me	1	-0.249	141	-17.09	0	1	0	0	1000
ENST00000252071	ACTR3C	Coding	Click Me	1	-0.641	140	-11.23	1	0	0	0	396
NM_001279350	REXO4	Coding	Click Me	1	-0.248	168	-26.7	0	1	0	0	895
ENST00000396410	PDXDC1	Coding	Click Me	1	-0.354	151	-21.84	0	1	0	0	2055
ENCT00000297820	CATG00000062999.1	Coding	Click Me	1	-0.347	140	-12.83	0	1	0	0	1000
ENST00000302516	SF3B3	Coding	Click Me	1	-0.253	145	-19.4	0	1	0	0	5855
ENST00000394077	RPL24	Coding	Click Me	1	-0.347	145	-13.86	0	1	0	0	3477
MICT00000296176	CATG00000082420.1	Coding	Click Me	1	-0.334	149	-19.12	0	1	0	0	1000
ENST00000356392	CCDC151	Coding	Click Me	1	-0.408	143	-13.45	0	1	0	0	231
ENST00000505065	CDC42SE2	Coding	Click Me	1	-0.157	145	-13.84	0	1	0	0	3576
HBMT00000439253	CATG00000020287.1	Coding	Click Me	1	-0.209	146	-18.42	0	1	0	0	1000
MICT00000247025	CATG00000061099.1	Coding	Click Me	1	-0.263	147	-19.01	0	1	0	0	1000
ENST00000243457	KCNJ2	Coding	Click Me	1	-0.219	145	-12.44	0	1	0	0	3725
ENST00000556922	AC092143.1	Coding	Click Me	1	-0.248	143	-20.11	0	0	1	0	296
ENST00000270257	GEMIN7	Coding	Click Me	1	-0.277	147	-13.52	0	1	0	0	1014
ENST00000448921	SERPINA1	Coding	Click Me	1	-0.328	143	-16.87	0	1	0	0	1702
ENST00000422945	PPP2R5C	Coding	Click Me	1	-0.645	145	-16.92	1	0	0	0	2719
ENST00000391884	KCNJ14	Coding	Click Me	1	-0.531	142	-20.73	1	0	0	0	2201
HBMT00000597373	CATG00000031212.1	Coding	Click Me	1	-0.235	140	-16.66	0	1	0	0	1000
ENST00000640345	AC092718.8	Coding	Click Me	1	-0.324	140	-21.57	0	1	0	0	2292
ENST00000368149	ARHGAP18	Coding	Click Me	1	-0.396	149	-17.29	0	1	0	0	2985
MICT00000368111	CATG00000107272.1	Coding	Click Me	1	-0.34	143	-17.39	0	1	0	0	1000
ENST00000241416	ACVR2A	Coding	Click Me	1	-0.268	140	-19	0	0	1	0	3553
ENST00000458420	CLSTN2	Coding	Click Me	1	-0.115	145	-17.21	0	1	0	0	11999
MICT00000211400	CATG00000047322.1	Coding	Click Me	1	-0.275	143	-16.98	0	1	0	0	1000
ENST00000371935	REXO4	Coding	Click Me	1	-0.248	168	-26.7	0	1	0	0	894
ENCT00000299154	CATG00000063458.1	Coding	Click Me	1	-0.304	153	-21.62	0	1	0	0	1000
ENST00000381055	ADAMTS6	Coding	Click Me	1	-0.307	141	-16.48	0	1	0	0	3100
ENST00000254066	RARA	Coding	Click Me	1	-0.302	157	-22	0	1	0	0	570
ENST00000344120	SPRY4	Coding	Click Me	1	-0.182	151	-17.96	1	0	0	0	3782
ENST00000311129	PPP2R1B	Coding	Click Me	1	-0.276	146	-17.46	0	1	0	0	1597
ENST00000265627	PON3	Coding	Click Me	1	-0.5	151	-18.71	1	0	0	0	2184
ENST00000519973	SLC25A37	Coding	Click Me	1	-0.105	142	-15.32	0	1	0	0	3608
MICT00000052695	CATG00000001316.1	Coding	Click Me	1	-0.235	144	-14.2	0	1	0	0	1000
ENST00000373091	GRIK3	Coding	Click Me	1	-0.139	153	-21.48	0	1	0	0	6324
ENST00000278071	ITPRIP	Coding	Click Me	1	-0.426	143	-17.13	0	1	0	0	4710
ENST00000301785	HNRNPUL2	Coding	Click Me	1	-0.307	153	-17.13	0	1	0	0	2674
MICT00000325380	CATG00000092473.1	Coding	Click Me	2	-0.661	291	-31.72	0	2	0	0	1000
ENST00000328459	TTC7B	Coding	Click Me	1	-0.642	146	-13.79	1	0	0	0	780
ENST00000359933	ATG2B	Coding	Click Me	1	-0.327	148	-16.29	0	1	0	0	4497
ENCT00000271943	CATG00000056217.1	Coding	Click Me	1	-0.273	144	-16.61	0	1	0	0	1000
ENST00000383657	HACD2	Coding	Click Me	1	-0.309	148	-17.83	1	0	0	0	3337
HBMT00001233559	CATG00000084182.1	Coding	Click Me	1	-0.462	145	-15.79	1	0	0	0	1000
ENST00000404138	ZBTB40	Coding	Click Me	1	-0.22	143	-17.23	0	0	1	0	4761
ENST00000300258	TCP10L	Coding	Click Me	1	-0.364	140	-14.2	0	1	0	0	1933
ENST00000261332	ZNF24	Coding	Click Me	1	-0.35	163	-20.82	1	0	0	0	5027
ENST00000367090	TMEM181	Coding	Click Me	1	-0.404	140	-14.57	1	0	0	0	3547
ENST00000397885	PUM3	Coding	Click Me	1	-0.254	153	-24.56	0	1	0	0	1246
ENST00000267257	PXN	Coding	Click Me	1	-0.248	147	-19.72	0	1	0	0	1875
ENST00000487519	TFAM	Coding	Click Me	1	-0.195	146	-14.21	0	1	0	0	6398
ENCT00000141724	CATG00000022986.1	Coding	Click Me	1	-0.267	140	-14.88	0	1	0	0	1000
ENST00000326446	ARL6IP6	Coding	Click Me	1	-0.242	153	-19.66	0	1	0	0	2554
ENST00000380191	GDI2	Coding	Click Me	1	-0.587	142	-13.61	1	0	0	0	2568
FTMT23200004806	CATG00000099762.1	Coding	Click Me	1	-0.252	141	-13.66	0	1	0	0	575
HBMT00000541937	CATG00000027114.1	Coding	Click Me	1	-0.396	140	-17.18	1	0	0	0	962
ENST00000361272	CNOT7	Coding	Click Me	1	-0.358	151	-19.45	0	1	0	0	3996
FTMT24800003332	CATG00000009256.1	Coding	Click Me	1	-0.374	140	-12.83	0	1	0	0	1000
ENST00000371942	REXO4	Coding	Click Me	1	-0.248	168	-26.7	0	1	0	0	928
ENST00000353442	LMBR1	Coding	Click Me	1	-0.272	150	-16.13	1	0	0	0	6287
ENST00000401878	RBM33	Coding	Click Me	1	-0.111	148	-19.46	0	1	0	0	6438
ENST00000196061	PLOD1	Coding	Click Me	1	-0.247	140	-16.97	0	0	1	0	745
ENST00000332772	SIMC1	Coding	Click Me	1	-0.545	141	-13.38	1	0	0	0	544
FTMT24800002966	CATG00000009093.1	Coding	Click Me	2	-0.723	291	-31.99	0	2	0	0	1000
ENST00000423059	THSD7A	Coding	Click Me	1	-0.355	154	-21.6	0	1	0	0	5437
ENST00000608382	ZBTB25	Coding	Click Me	1	-0.202	151	-18.92	0	1	0	0	8872
ENCT00000260683	CATG00000053041.1	Coding	Click Me	1	-0.299	149	-18.91	0	1	0	0	1000
ENST00000424789	TANC2	Coding	Click Me	1	-0.161	147	-17.6	0	1	0	0	5751
ENST00000639401	AC131160.1	Coding	Click Me	1	-0.239	142	-23.71	0	0	1	0	1788
ENST00000358913	MYPN	Coding	Click Me	1	-0.241	149	-20.13	1	0	0	0	13128
MICT00000362324	CATG00000106129.1	Coding	Click Me	1	-0.28	152	-14.82	0	1	0	0	1000
ENST00000374518	BMS1	Coding	Click Me	1	-0.288	146	-20.06	0	1	0	0	3841
ENST00000274532	TIMD4	Coding	Click Me	1	-0.234	144	-17.42	0	1	0	0	3723
HBMT00001471007	CATG00000106826.1	Coding	Click Me	1	-0.29	152	-18.15	0	1	0	0	865
MICT00000190665	CATG00000043116.1	Coding	Click Me	1	-0.321	142	-13.19	0	1	0	0	1000
ENST00000349314	APOL3	Coding	Click Me	1	-0.226	149	-18.35	0	1	0	0	870
ENST00000428304	ABHD4	Coding	Click Me	1	-0.191	147	-26.02	0	0	1	0	2176
ENST00000265354	SRF	Coding	Click Me	1	-0.223	142	-15.85	0	0	1	0	2316
ENCT00000447516	CATG00000105907.1	Coding	Click Me	1	-0.292	154	-21	0	1	0	0	1000
ENST00000238667	FLVCR2	Coding	Click Me	1	-0.245	140	-19.87	0	1	0	0	1697
ENST00000305428	KIAA1024	Coding	Click Me	1	-0.234	141	-19.46	0	0	1	0	3916
ENST00000539247	ARMCX6	Coding	Click Me	1	-0.355	146	-18.2	0	1	0	0	592
ENST00000252602	MRPL34	Coding	Click Me	1	-0.281	152	-25.91	0	1	0	0	464
ENST00000298542	FRMD7	Coding	Click Me	1	-0.413	159	-27.95	0	1	0	0	877
FTMT21200002522	CATG00000060036.1	Coding	Click Me	1	-0.491	165	-24.36	1	0	0	0	1000
ENST00000318631	MAP6D1	Coding	Click Me	1	-0.239	142	-23.71	0	0	1	0	1480
ENST00000338821	ATP9A	Coding	Click Me	1	-0.171	140	-11.96	1	0	0	0	4697
ENST00000251871	MED17	Coding	Click Me	1	-0.322	140	-16.89	0	1	0	0	2631
ENST00000310441	HCFC1	Coding	Click Me	1	-0.237	156	-21.21	0	1	0	0	1794
ENST00000436874	VEZT	Coding	Click Me	1	-0.207	148	-18.21	0	1	0	0	4654
ENST00000641868	OR2M4	Coding	Click Me	1	-0.223	141	-18.94	0	1	0	0	4815
ENST00000268070	ADAMTS17	Coding	Click Me	1	-0.191	160	-26.76	0	1	0	0	2964
ENST00000521180	ST3GAL1	Coding	Click Me	1	-0.335	149	-20.19	0	1	0	0	4911
ENST00000320785	KIF1C	Coding	Click Me	1	-0.289	154	-16.4	1	0	0	0	6285
HBMT00000770827	CATG00000043658.1	Coding	Click Me	1	-0.277	158	-21.5	0	1	0	0	1000
ENST00000389100	RNF180	Coding	Click Me	1	-0.334	146	-20.9	0	1	0	0	3055
ENCT00000346150	CATG00000076354.1	Coding	Click Me	1	-0.557	146	-20.22	1	0	0	0	1000
ENST00000542230	TMEM50B	Coding	Click Me	1	-0.256	145	-20.44	0	1	0	0	1733
ENST00000640655	AC116366.3	Coding	Click Me	1	-0.584	160	-21.52	1	0	0	0	3715
ENST00000450993	PLCD4	Coding	Click Me	1	-0.565	149	-17.76	1	0	0	0	609
ENCT00000424171	CATG00000098582.1	Coding	Click Me	1	-0.248	140	-18.77	0	1	0	0	1000
ENCT00000044807	CATG00000111122.1	Coding	Click Me	1	-0.437	151	-17.23	1	0	0	0	991
HBMT00000303718	CATG00000008616.1	Coding	Click Me	1	-0.23	151	-20.53	0	1	0	0	362
ENCT00000097705	CATG00000010950.1	Coding	Click Me	2	-0.752	300	-31.99	1	1	0	0	1000
ENCT00000179109	CATG00000032638.1	Coding	Click Me	1	-0.477	149	-16.58	1	0	0	0	1000
ENST00000590317	LYPD8	Coding	Click Me	1	-0.275	141	-20.89	0	0	1	0	196
ENST00000379287	GFOD1	Coding	Click Me	1	-0.241	149	-16.41	1	0	0	0	6913
ENST00000380639	PTCD2	Coding	Click Me	1	-0.143	140	-13.28	0	1	0	0	4495
ENST00000249066	APOL2	Coding	Click Me	1	-0.207	149	-19.32	0	1	0	0	1194
ENST00000259154	KCTD3	Coding	Click Me	1	-0.381	144	-14.99	0	1	0	0	2386
MICT00000303276	CATG00000083821.1	Coding	Click Me	1	-0.376	165	-25.45	0	1	0	0	1000
ENST00000400256	COLEC12	Coding	Click Me	1	-0.676	151	-16.18	1	0	0	0	690
ENCT00000278074	CATG00000057491.1	Coding	Click Me	1	-0.271	156	-19.99	0	1	0	0	1000
ENST00000288135	KIT	Coding	Click Me	1	-0.292	149	-17.13	0	1	0	0	2226
ENST00000366898	PRKN	Coding	Click Me	1	-0.173	154	-22.83	0	1	0	0	2690
FTMT25200007594	CATG00000016284.1	Coding	Click Me	1	-0.26	140	-15.53	0	1	0	0	413
ENST00000434783	FAM230A	Coding	Click Me	1	-0.467	142	-15.79	1	0	0	0	5952
ENCT00000068636	CATG00000002739.1	Coding	Click Me	1	-0.211	146	-22.51	0	1	0	0	1000
ENST00000296522	HPGD	Coding	Click Me	1	-0.272	147	-16.14	0	1	0	0	2783
MICT00000142994	CATG00000030840.1	Coding	Click Me	1	-0.232	147	-22.24	0	1	0	0	1000
ENST00000320954	CRTAP	Coding	Click Me	1	-0.251	143	-13.11	1	0	0	0	5601
ENST00000419235	DUSP22	Coding	Click Me	1	-0.246	149	-21.86	0	1	0	0	2404
ENST00000605587	C17orf50	Coding	Click Me	1	-0.302	148	-21.39	0	1	0	0	461
ENST00000378509	SLC35B4	Coding	Click Me	1	-0.608	149	-15.93	1	0	0	0	5501
ENST00000256996	DDB2	Coding	Click Me	1	-0.306	140	-15.64	0	1	0	0	852
ENCT00000451796	CATG00000107372.1	Coding	Click Me	1	-0.22	152	-18.25	0	1	0	0	1000
ENST00000391767	CACNG7	Coding	Click Me	1	-0.257	140	-16.88	0	1	0	0	1648
ENCT00000004031	CATG00000107162.1	Coding	Click Me	1	-0.3	148	-14.99	0	1	0	0	1000
ENST00000290167	WNT4	Coding	Click Me	1	-0.276	140	-13.18	0	1	0	0	2745
MICT00000084007	CATG00000009934.1	Coding	Click Me	1	-0.563	162	-22.56	1	0	0	0	1000
ENST00000376351	GPR158	Coding	Click Me	1	-0.192	160	-19.24	1	0	0	0	2954
MICT00000170306	CATG00000038779.1	Coding	Click Me	1	-0.248	140	-13.51	0	1	0	0	1000
ENCT00000136603	CATG00000021838.1	Coding	Click Me	1	-0.549	157	-22.33	1	0	0	0	1000
ENST00000334062	RASA3	Coding	Click Me	1	-0.296	152	-18.6	0	1	0	0	1564
ENST00000235372	PRDM2	Coding	Click Me	1	-0.305	143	-17.33	0	1	0	0	1944
ENST00000380822	AK6	Coding	Click Me	1	-0.298	141	-19.99	0	0	1	0	1077
ENST00000315322	IFT22	Coding	Click Me	1	-0.336	145	-21.59	0	1	0	0	478
ENCT00000161593	CATG00000028260.1	Coding	Click Me	1	-0.49	148	-20.19	1	0	0	0	1000
ENST00000381883	PLPP6	Coding	Click Me	1	-0.305	146	-19.89	0	1	0	0	2009
MICT00000382669	CATG00000112890.1	Coding	Click Me	1	-0.616	140	-12.63	1	0	0	0	1000
ENST00000647395	THPO	Coding	Click Me	1	-0.249	146	-19.63	0	0	1	0	578
MICT00000222194	CATG00000053966.1	Coding	Click Me	1	-0.242	141	-14.85	0	1	0	0	1000
ENST00000367204	SOX13	Coding	Click Me	1	-0.283	153	-19.91	0	1	0	0	1609
MICT00000232033	CATG00000057419.1	Coding	Click Me	1	-0.574	146	-13.44	1	0	0	0	1000
ENST00000332947	FAM43B	Coding	Click Me	1	-0.255	148	-16.55	0	1	0	0	1057
ENST00000392288	ZNF493	Coding	Click Me	1	-0.362	140	-14.7	0	1	0	0	4033
ENST00000296736	TIGD6	Coding	Click Me	1	-0.124	148	-16.83	0	1	0	0	3763
ENST00000327347	SEPHS1	Coding	Click Me	1	-0.313	163	-22.76	0	1	0	0	3675
ENST00000325327	LMNB2	Coding	Click Me	1	-0.171	145	-18.63	0	0	1	0	2746
ENST00000244769	ATXN1	Coding	Click Me	1	-0.241	150	-14.83	1	0	0	0	7217
ENST00000599848	UPF1	Coding	Click Me	1	-0.381	153	-19.91	1	0	0	0	1712
ENST00000373887	TRAF1	Coding	Click Me	1	-0.102	140	-13.18	0	1	0	0	7433
ENST00000378823	RAD50	Coding	Click Me	1	-0.52	160	-21.52	1	0	0	0	3971
MICT00000277457	CATG00000074949.1	Coding	Click Me	1	-0.166	146	-17.65	0	1	0	0	1000
ENST00000443967	SIMC1	Coding	Click Me	1	-0.545	141	-13.38	1	0	0	0	546
ENST00000380817	SBF1	Coding	Click Me	1	-0.278	154	-20.2	0	1	0	0	2142
ENST00000600228	ZNF616	Coding	Click Me	1	-0.554	148	-21.64	1	0	0	0	2615
ENCT00000202697	CATG00000038771.1	Coding	Click Me	1	-0.573	153	-24.81	1	0	0	0	1000
ENST00000409299	PXMP4	Coding	Click Me	1	-0.239	152	-20.28	0	1	0	0	4962
ENST00000259605	RNF38	Coding	Click Me	1	-0.309	152	-21.08	0	1	0	0	3356
FTMT22000002399	CATG00000075756.1	Coding	Click Me	1	-0.511	146	-14.63	1	0	0	0	1000
ENST00000295119	NUP35	Coding	Click Me	1	-0.594	154	-18.65	1	0	0	0	1706
ENST00000320005	CNGB3	Coding	Click Me	1	-0.285	145	-14.4	0	1	0	0	1869
ENST00000301488	CDK2AP2	Coding	Click Me	1	-0.256	153	-27.84	0	0	1	0	456
MICT00000155430	CATG00000032523.1	Coding	Click Me	1	-0.492	148	-16.73	1	0	0	0	1000
ENST00000265094	FBXW11	Coding	Click Me	1	-0.565	141	-13.99	1	0	0	0	2575
MICT00000254694	CATG00000062846.1	Coding	Click Me	1	-0.37	151	-21.87	0	1	0	0	1000
MICT00000236022	CATG00000058026.1	Coding	Click Me	1	-0.253	140	-12.59	0	1	0	0	1000
HBMT00000607830	CATG00000032100.1	Coding	Click Me	1	-0.293	160	-20.68	0	1	0	0	1000
ENST00000378083	KCNAB2	Coding	Click Me	1	-0.175	156	-21.36	0	1	0	0	2605
ENST00000296702	TCERG1	Coding	Click Me	1	-0.248	156	-23.43	0	1	0	0	2699
ENCT00000092207	CATG00000009204.1	Coding	Click Me	1	-0.342	141	-12.58	0	1	0	0	1000
ENST00000281631	PARP8	Coding	Click Me	1	-0.61	147	-13.79	1	0	0	0	4454
ENST00000341199	SIMC1	Coding	Click Me	1	-0.546	141	-13.38	1	0	0	0	540
ENST00000370096	COL11A1	Coding	Click Me	1	-0.227	144	-22.04	0	0	1	0	1552
ENST00000609713	KCNJ6	Coding	Click Me	1	-0.169	157	-21.16	0	1	0	0	17783
ENST00000335071	FOXE3	Coding	Click Me	1	-0.262	146	-23.18	0	0	1	0	777
HBMT00000043737	CATG00000033941.1	Coding	Click Me	1	-0.341	151	-19.82	0	1	0	0	1000
ENST00000397843	ARHGEF12	Coding	Click Me	1	-0.199	150	-14.32	0	1	0	0	4859
ENST00000280871	SLC2A13	Coding	Click Me	1	-0.239	145	-20.74	0	1	0	0	5005
HBMT00000662962	CATG00000035909.1	Coding	Click Me	1	-0.276	149	-20.16	0	1	0	0	1000
ENST00000395275	CALN1	Coding	Click Me	1	-0.121	147	-16.64	0	1	0	0	8284
ENST00000274000	AP1AR	Coding	Click Me	1	-0.211	145	-20.14	0	1	0	0	4314
ENST00000430704	SIMC1	Coding	Click Me	1	-0.545	141	-13.38	1	0	0	0	409
MICT00000278098	CATG00000079024.1	Coding	Click Me	1	-0.308	156	-26.47	0	1	0	0	1000
MICT00000235293	CATG00000057919.1	Coding	Click Me	1	-0.165	145	-17.5	0	1	0	0	1000
ENST00000309241	PPARGC1B	Coding	Click Me	1	-0.16	154	-21.53	0	1	0	0	7464
ENST00000359947	PTPRF	Coding	Click Me	1	-0.317	149	-17.41	0	1	0	0	1663
ENST00000379333	SLC23A2	Coding	Click Me	1	-0.202	142	-18.49	0	1	0	0	4616
ENST00000358025	SYNE2	Coding	Click Me	1	-0.37	145	-19.72	0	1	0	0	923
MICT00000066053	CATG00000003494.1	Coding	Click Me	1	-0.531	149	-17.22	1	0	0	0	1000
ENST00000336273	MTDH	Coding	Click Me	1	-0.231	159	-22.07	1	0	0	0	5610
ENST00000267859	BNIP2	Coding	Click Me	1	-0.388	141	-14.29	1	0	0	0	4925
ENST00000315576	ADGRE2	Coding	Click Me	1	-0.512	142	-14.66	1	0	0	0	3843
ENCT00000228958	CATG00000044356.1	Coding	Click Me	1	-0.332	148	-19.64	0	1	0	0	1000

## Sheet: other-3 35-tRNA-Lys-CTT-1-M2
Predicted target genes for Other-3_35-tRNA-Lys-CTT-1-M2
# Column A: Seqname, the name the sequence.
# Column B: GeneSymbol, the official gene symbol of the sequence.
# Column C: Type, the type of the transcipt.
# Column D: Diagrams, the diagrams illustrate key features for miRNA binding. See Ref [1,2] for details.
# Column E: Total, the total number of the binding sites on the targets.
# Column F: Context+, the sum of the context+ scores used in TargetScan after version 6.0. More negative is better. See Ref [3] for details.
# Column G: Structure, the sum of the structure scores used in miRanda (Ref [4]). The higher the better.
# Column H: Energy, the sum of the free energy predicted by miRanda (Ref [4]). More negative is better.
# Column I ~ Column L: Counting numbers for different seed match types
# Reference:
[1] Grimson A., et al. MicroRNA Targeting Specificity in Mammals: Determinants beyond Seed Pairing. Molecular Cell, Volume 27, Issue 1, 91-105, 6 July 2007.
[2] Amy E. Pasquinelli. MicroRNAs and their targets: recognition, regulation and an emerging reciprocal relationship. Nature Reviews Genetics, Volume 13, 271-282, 1 April 2012.
[3] David M Garcia., et al. Weak Seed-Pairing Stability and High Target-Site Abundance Decrease the Proficiency of lsy-6 and Other miRNAs. Nat. Struct. Mol. Biol., Volume 18, 1139-1146, 2011.
[4] Enright AJ., el al. miRanda algorithm: MicroRNA targets in Drosophila. Genome Biology, Volume 5, R1, 2003.
Target genes for Other-3_35-tRNA-Lys-CTT-1-M2
Target			Sites		TargetScan	miranda		Seed match types				Annotations
Seqname	GeneSymbol	Type	Diagrams	Total	Context+	Structure	Energy	8mer-1a	7mer-m8	7mer-1a	Imperfect	UTR Length
ENST00000606183	POU5F2	Coding	Click Me	1	-0.164	141	-32.29	0	1	0	0	7357
ENST00000274276	OSMR	Coding	Click Me	1	-0.205	172	-26.53	0	1	0	0	2303
ENST00000366903	HLX	Coding	Click Me	1	-0.211	143	-31.71	0	0	1	0	1343
ENST00000378090	C12orf73	Coding	Click Me	1	-0.639	145	-29.82	1	0	0	0	1329
ENST00000373173	APOOL	Coding	Click Me	1	-0.234	159	-25.62	0	1	0	0	5639
ENST00000266604	LLPH	Coding	Click Me	1	-0.283	149	-32.14	0	1	0	0	7274
ENST00000267202	VPS37B	Coding	Click Me	1	-0.213	163	-31.9	0	1	0	0	1788
ENST00000257552	MSI1	Coding	Click Me	1	-0.305	154	-33.96	0	1	0	0	1797
ENST00000308022	TMEM134	Coding	Click Me	1	-0.121	170	-29.3	0	1	0	0	2904
ENST00000230124	FIG4	Coding	Click Me	1	-0.177	168	-32.08	0	1	0	0	3847
ENST00000442218	SLC48A1	Coding	Click Me	1	-0.146	147	-28.81	0	1	0	0	2472
ENST00000371711	B4GALT5	Coding	Click Me	1	-0.297	153	-30.12	0	1	0	0	3367
ENST00000432176	FAM126A	Coding	Click Me	1	-0.119	150	-22.9	0	1	0	0	4330
ENST00000220764	DECR1	Coding	Click Me	1	-0.305	140	-21.76	0	1	0	0	1715
ENST00000341105	GATA2	Coding	Click Me	1	-0.483	144	-25.97	1	0	0	0	1643
ENST00000432074	DAP	Coding	Click Me	1	-0.112	163	-24.15	0	1	0	0	3931
ENST00000543227	ZNF611	Coding	Click Me	1	-0.138	148	-35.97	0	1	0	0	5594
ENST00000488633	CIAO1	Coding	Click Me	1	-0.271	141	-30.84	0	1	0	0	2811
ENST00000471181	BRCA1	Coding	Click Me	1	-0.303	148	-32.59	0	1	0	0	1383
ENST00000377797	TCOF1	Coding	Click Me	1	-0.518	159	-22.4	1	0	0	0	520
ENST00000249064	CCDC117	Coding	Click Me	1	-0.57	148	-28.66	1	0	0	0	2975
ENST00000276173	RIPPLY1	Coding	Click Me	1	-0.39	167	-30.44	0	1	0	0	686
ENST00000302513	C2orf15	Coding	Click Me	1	-0.585	140	-21.35	1	0	0	0	3750
ENST00000249344	STRIP2	Coding	Click Me	2	-0.326	307	-62.26	0	2	0	0	4319
ENST00000581347	TMEM200C	Coding	Click Me	1	-0.113	178	-26.9	0	1	0	0	8126
ENST00000215980	CENPM	Coding	Click Me	1	-0.292	140	-22.41	1	0	0	0	4480
ENST00000394170	ZKSCAN5	Coding	Click Me	1	-0.277	157	-33.87	0	1	0	0	1857
ENST00000374045	TNFSF15	Coding	Click Me	1	-0.224	149	-32.14	0	1	0	0	5817
ENST00000641113	OR7A17	Coding	Click Me	1	-0.248	140	-32.54	0	1	0	0	2223
ENST00000579534	POLI	Coding	Click Me	1	-0.313	156	-23.82	1	0	0	0	3785
ENST00000414645	DPY19L4	Coding	Click Me	1	-0.179	140	-36.99	0	1	0	0	3942
ENST00000381848	PLIN5	Coding	Click Me	1	-0.336	147	-29.43	0	1	0	0	1500
ENST00000359887	CTAG1B	Coding	Click Me	1	-0.594	149	-24.73	1	0	0	0	427
ENST00000381501	TEC	Coding	Click Me	1	-0.484	159	-25.15	1	0	0	0	1633
ENST00000481739	RXRA	Coding	Click Me	1	-0.287	152	-23.01	0	1	0	0	3972
ENST00000399398	RNF222	Coding	Click Me	1	-0.171	160	-32.5	0	1	0	0	2090
ENST00000619039	PIP4K2B	Coding	Click Me	1	-0.322	172	-26.94	1	0	0	0	4002
ENST00000392552	GPR155	Coding	Click Me	1	-0.357	141	-22.88	0	1	0	0	4544
ENST00000331222	CLN8	Coding	Click Me	2	-0.573	291	-58.38	0	2	0	0	6005
ENST00000373491	TBC1D22B	Coding	Click Me	1	-0.198	159	-27.36	0	1	0	0	1798
ENST00000315872	ROCK2	Coding	Click Me	1	-0.167	144	-32.25	0	1	0	0	3681
ENST00000395326	CRCP	Coding	Click Me	1	-0.414	159	-29.4	1	0	0	0	2204
ENST00000368918	GABPB2	Coding	Click Me	1	-0.154	140	-24.7	0	1	0	0	7286
ENST00000610426	NSA2	Coding	Click Me	1	-0.202	157	-29.67	0	1	0	0	3442
ENST00000376423	GRIPAP1	Coding	Click Me	1	-0.277	140	-29.42	0	1	0	0	1344
ENCT00000346150	CATG00000076354.1	Coding	Click Me	1	-0.474	141	-20.95	1	0	0	0	1000
ENCT00000080782	CATG00000006216.1	Coding	Click Me	1	-0.374	141	-19.54	0	1	0	0	1000
ENST00000285814	NIFK	Coding	Click Me	1	-0.15	145	-32.15	0	1	0	0	3027
ENST00000216160	TAB1	Coding	Click Me	1	-0.312	141	-26.85	1	0	0	0	5072
ENST00000524189	KIF13B	Coding	Click Me	1	-0.225	147	-29.92	1	0	0	0	3226
ENST00000436120	ZNF527	Coding	Click Me	1	-0.171	145	-32.15	0	1	0	0	3185
ENST00000338502	SPRED3	Coding	Click Me	1	-0.177	149	-30.27	0	1	0	0	3442
ENST00000296464	HSPA4L	Coding	Click Me	2	-0.838	306	-54.87	1	1	0	0	7877
ENST00000303924	HAS2	Coding	Click Me	1	-0.2	144	-33.79	0	1	0	0	5229
ENST00000332312	EMILIN3	Coding	Click Me	1	-0.388	141	-30.61	0	1	0	0	1302
ENST00000325418	HASPIN	Coding	Click Me	1	-0.277	163	-32.04	0	1	0	0	1583
ENST00000621161	RAB11FIP4	Coding	Click Me	1	-0.258	143	-28.44	0	1	0	0	6485
ENCT00000054015	CATG00000117745.1	Coding	Click Me	1	-0.347	146	-31.79	0	1	0	0	1000
ENST00000554048	DUXA	Coding	Click Me	1	-0.293	160	-35.45	0	1	0	0	2686
ENST00000395891	HECW1	Coding	Click Me	1	-0.154	140	-31.59	0	1	0	0	4095
ENST00000321556	PINK1	Coding	Click Me	1	-0.32	141	-30.44	0	1	0	0	820
ENCT00000255365	CATG00000052157.1	Coding	Click Me	1	-0.335	140	-27.4	0	1	0	0	1000
ENST00000379119	BCAP29	Coding	Click Me	1	-0.141	141	-24.74	0	1	0	0	4712
ENST00000395395	ZNF169	Coding	Click Me	1	-0.269	151	-23.36	0	1	0	0	2613
ENST00000400485	MORC3	Coding	Click Me	1	-0.336	152	-28.97	0	1	0	0	2052
ENST00000373664	RBL1	Coding	Click Me	1	-0.33	149	-32.14	0	1	0	0	2680
ENST00000223114	MOGAT3	Coding	Click Me	1	-0.325	140	-30.55	0	1	0	0	939
ENST00000430325	CNTD2	Coding	Click Me	1	-0.217	163	-27.14	0	1	0	0	844
FTMT21200003062	CATG00000060361.1	Coding	Click Me	1	-0.253	141	-27.71	0	1	0	0	1000
ENST00000262293	PRR11	Coding	Click Me	2	-0.5	280	-68	0	2	0	0	5078
HBMT00000505065	CATG00000025491.1	Coding	Click Me	1	-0.208	154	-22.45	0	1	0	0	1000
FTMT27600000202	CATG00000038259.1	Coding	Click Me	1	-0.246	142	-27.78	0	1	0	0	1000
ENST00000202816	ESF1	Coding	Click Me	1	-0.172	156	-39.78	0	1	0	0	4563
ENST00000400377	ICOSLG	Coding	Click Me	1	-0.202	161	-31.14	0	1	0	0	2200
ENST00000371199	XIAP	Coding	Click Me	1	-0.125	144	-33.07	0	1	0	0	6798
ENST00000264935	CEP72	Coding	Click Me	1	-0.23	159	-29.73	0	1	0	0	3926
ENST00000240874	KALRN	Coding	Click Me	1	-0.256	161	-35.69	0	1	0	0	1394
ENST00000285083	OXNAD1	Coding	Click Me	1	-0.426	152	-23.36	1	0	0	0	2531
ENST00000317402	GEN1	Coding	Click Me	1	-0.235	143	-33.05	0	1	0	0	7002
ENST00000316407	USF3	Coding	Click Me	1	-0.384	143	-19.78	0	1	0	0	6559
ENST00000295757	HDAC11	Coding	Click Me	1	-0.161	153	-33.06	0	1	0	0	1741
ENST00000328070	ZNF71	Coding	Click Me	1	-0.355	149	-32.14	0	1	0	0	4073
ENST00000590923	AP1M2	Coding	Click Me	1	-0.362	150	-19.34	0	1	0	0	402
ENCT00000169225	CATG00000030138.1	Coding	Click Me	1	-0.235	158	-28.52	0	1	0	0	1000
ENST00000442744	UBA52	Coding	Click Me	1	-0.256	149	-24.43	0	1	0	0	2400
ENST00000372546	DOLPP1	Coding	Click Me	1	-0.294	145	-24.68	0	0	1	0	1428
ENST00000397195	PAFAH1B1	Coding	Click Me	1	-0.191	150	-23.05	0	1	0	0	3813
ENST00000333813	TRARG1	Coding	Click Me	1	-0.259	172	-34.29	0	1	0	0	2723
ENST00000343958	FGD6	Coding	Click Me	1	-0.187	144	-31.77	0	1	0	0	4771
ENST00000394607	ELOVL6	Coding	Click Me	1	-0.192	149	-22.38	0	1	0	0	5492
uc022bpl.1	RBSG2	Coding	Click Me	1	-0.264	142	-29.11	0	1	0	0	673
ENST00000621355	SMOX	Coding	Click Me	1	-0.251	169	-29.42	0	1	0	0	339
FTMT20200000122	CATG00000043521.1	Coding	Click Me	1	-0.188	153	-34.53	0	1	0	0	1000
ENST00000341785	FAM163A	Coding	Click Me	1	-0.445	147	-21.36	1	0	0	0	2862
ENST00000356352	UPF2	Coding	Click Me	1	-0.226	142	-26.84	0	0	1	0	1276
ENST00000374531	PALM2	Coding	Click Me	1	-0.249	154	-29.3	0	1	0	0	3278
ENST00000341071	BSDC1	Coding	Click Me	1	-0.327	154	-29.61	1	0	0	0	3700
HBMT00000250926	CATG00000005882.1	Coding	Click Me	1	-0.254	148	-31.04	0	1	0	0	1000
ENST00000331768	SETD3	Coding	Click Me	1	-0.145	141	-26.29	0	1	0	0	3625
ENST00000425699	NANOS1	Coding	Click Me	1	-0.193	143	-33.12	0	1	0	0	3662
ENST00000398600	MX1	Coding	Click Me	1	-0.304	161	-30.06	0	1	0	0	456
ENST00000367612	TOR1AIP2	Coding	Click Me	2	-0.203	316	-62.36	0	2	0	0	6104
ENST00000303329	ARNT2	Coding	Click Me	1	-0.459	140	-21.39	1	0	0	0	4239
ENST00000367201	ETNK2	Coding	Click Me	1	-0.22	152	-36.31	0	1	0	0	1205
ENST00000395738	ADM2	Coding	Click Me	1	-0.164	147	-25.28	0	0	1	0	3537
ENST00000247470	PYCARD	Coding	Click Me	1	-0.289	146	-31.96	0	1	0	0	2247
ENST00000381793	RBM47	Coding	Click Me	1	-0.199	146	-31.16	0	1	0	0	2637
ENST00000343813	ICMT	Coding	Click Me	1	-0.476	149	-30.69	1	0	0	0	3887
ENST00000616170	SH3GLB1	Coding	Click Me	1	-0.159	140	-36.93	0	1	0	0	4941
MICT00000300750	CATG00000088014.1	Coding	Click Me	1	-0.215	140	-29.92	0	0	1	0	1000
ENST00000262815	MAU2	Coding	Click Me	1	-0.199	151	-36.39	0	1	0	0	2972
ENST00000399794	RBMXL1	Coding	Click Me	1	-0.285	142	-18.65	1	0	0	0	3195
ENST00000372945	MRPS16	Coding	Click Me	1	-0.198	150	-38.81	0	1	0	0	2346
ENST00000394123	G3BP1	Coding	Click Me	1	-0.101	141	-29.5	0	1	0	0	8694
ENST00000374409	STPG1	Coding	Click Me	1	-0.241	151	-33.75	0	1	0	0	2718
ENST00000489671	TFDP2	Coding	Click Me	1	-0.251	140	-26.38	0	1	0	0	8085
ENST00000283684	ATP8B1	Coding	Click Me	1	-0.31	144	-33.43	0	1	0	0	2070
ENST00000256925	CABLES1	Coding	Click Me	1	-0.265	154	-32	0	1	0	0	3103
ENST00000338437	CA7	Coding	Click Me	1	-0.232	157	-29.21	0	1	0	0	651
ENST00000375741	ARHGEF7	Coding	Click Me	1	-0.156	143	-19.34	0	1	0	0	6186
ENST00000339764	DNAJB13	Coding	Click Me	1	-0.2	147	-31.24	0	1	0	0	4161
ENST00000282226	FAM151B	Coding	Click Me	1	-0.149	140	-36.26	0	1	0	0	5149
ENST00000546910	CLEC5A	Coding	Click Me	1	-0.164	146	-21.92	0	0	1	0	2747
ENST00000507668	SERINC5	Coding	Click Me	1	-0.284	152	-32	0	1	0	0	505
ENST00000310473	UCP2	Coding	Click Me	1	-0.281	153	-30.56	0	1	0	0	738
ENST00000309594	MRPL57	Coding	Click Me	1	-0.306	140	-31.59	0	1	0	0	1859
ENST00000641833	OR1D2	Coding	Click Me	1	-0.274	144	-27.46	1	0	0	0	3574
ENST00000310571	PAAF1	Coding	Click Me	1	-0.197	153	-35.12	0	1	0	0	3762
ENST00000273986	CISD2	Coding	Click Me	1	-0.116	150	-36.38	0	1	0	0	5376
ENST00000432564	HCAR1	Coding	Click Me	1	-0.251	144	-28.64	0	1	0	0	2435
ENST00000325881	SNX22	Coding	Click Me	1	-0.332	145	-32.15	0	1	0	0	2973
ENST00000373366	GJB3	Coding	Click Me	1	-0.283	155	-30.08	0	1	0	0	789
ENST00000315579	NCAPD2	Coding	Click Me	1	-0.327	144	-32.14	0	1	0	0	554
ENST00000424881	ZNF655	Coding	Click Me	1	-0.203	144	-35.98	0	1	0	0	2865
ENST00000390654	COL23A1	Coding	Click Me	1	-0.203	146	-30.06	0	1	0	0	4943
ENST00000378165	NMT2	Coding	Click Me	2	-0.511	303	-63.77	0	2	0	0	3556
ENST00000373930	MEGF9	Coding	Click Me	1	-0.203	143	-33.33	0	1	0	0	4377
ENST00000329627	PEX26	Coding	Click Me	1	-0.157	148	-35.45	0	1	0	0	17321
ENST00000521381	PIK3R1	Coding	Click Me	1	-0.107	167	-29.73	0	1	0	0	4220
ENST00000376259	TNFRSF1B	Coding	Click Me	1	-0.239	148	-32.59	0	1	0	0	2208
ENST00000361124	ITPRIPL1	Coding	Click Me	1	-0.26	142	-30.21	0	1	0	0	2218
ENST00000377741	GPR20	Coding	Click Me	1	-0.221	140	-30.56	0	1	0	0	3447
ENST00000283921	HOXA10	Coding	Click Me	1	-0.207	170	-33.49	0	1	0	0	1308
ENST00000544589	AC132186.1	Coding	Click Me	1	-0.286	152	-25.6	0	1	0	0	1672
ENST00000330676	TLCD2	Coding	Click Me	2	-0.393	287	-59.52	0	2	0	0	4982
ENST00000296121	KIAA1143	Coding	Click Me	1	-0.104	169	-30.44	0	1	0	0	4597
ENST00000397333	DDX51	Coding	Click Me	1	-0.194	142	-21.5	0	1	0	0	2678
ENCT00000215689	CATG00000041177.1	Coding	Click Me	1	-0.253	140	-27.92	0	1	0	0	1000
MICT00000178935	CATG00000041300.1	Coding	Click Me	1	-0.23	142	-27.45	0	1	0	0	1000
ENST00000262961	ZFR2	Coding	Click Me	1	-0.146	144	-35.62	0	0	1	0	1925
ENST00000265245	LSG1	Coding	Click Me	1	-0.174	141	-31.6	0	1	0	0	4565
ENST00000232217	RBP2	Coding	Click Me	1	-0.1	151	-31.55	0	1	0	0	4364
ENST00000554789	THTPA	Coding	Click Me	1	-0.315	144	-24.58	0	1	0	0	851
ENST00000260746	ARL3	Coding	Click Me	1	-0.164	141	-35.58	0	0	1	0	3179
ENST00000380985	NLN	Coding	Click Me	1	-0.143	165	-34.91	0	1	0	0	6368
ENST00000388920	FOXI2	Coding	Click Me	1	-0.213	154	-31.28	0	1	0	0	2221
ENST00000614987	RPS6KA5	Coding	Click Me	1	-0.158	148	-25.72	0	1	0	0	24212
ENST00000355830	FAM227A	Coding	Click Me	1	-0.253	151	-30.23	0	1	0	0	2818
ENST00000396865	SLC38A9	Coding	Click Me	1	-0.141	141	-27.17	0	1	0	0	5223
ENST00000299505	KIAA0355	Coding	Click Me	1	-0.23	140	-31.59	0	1	0	0	2631
ENST00000397149	SMU1	Coding	Click Me	1	-0.184	144	-32.08	0	1	0	0	5529
ENST00000340855	IDS	Coding	Click Me	2	-0.286	287	-69.31	0	2	0	0	5756
ENST00000321265	NUDC	Coding	Click Me	1	-0.364	140	-25.48	0	1	0	0	716
ENST00000397412	CRAMP1	Coding	Click Me	2	-0.627	321	-63.41	1	1	0	0	3863
ENST00000338193	PRIM1	Coding	Click Me	1	-0.202	151	-25.41	0	1	0	0	3738
ENST00000292431	NACC1	Coding	Click Me	1	-0.218	161	-28.51	0	1	0	0	2743
ENST00000646673	SAMHD1	Coding	Click Me	1	-0.282	146	-31.28	0	1	0	0	3159
ENCT00000134413	CATG00000021286.1	Coding	Click Me	1	-0.307	140	-31.59	0	1	0	0	1000
ENST00000245680	SLC35F5	Coding	Click Me	1	-0.289	140	-33.86	0	1	0	0	3004
ENST00000574912	DPEP2NB	Coding	Click Me	1	-0.48	166	-25.85	1	0	0	0	672
ENST00000339468	YPEL1	Coding	Click Me	1	-0.322	143	-34.47	0	1	0	0	3592
ENST00000264758	ADD1	Coding	Click Me	1	-0.19	142	-29.74	0	0	1	0	1550
ENST00000396389	TUBB	Coding	Click Me	1	-0.317	146	-20.33	0	1	0	0	1029
ENST00000331426	RBM43	Coding	Click Me	1	-0.18	140	-31.59	0	1	0	0	3867
ENST00000349533	LEPR	Coding	Click Me	1	-0.144	158	-32.47	0	1	0	0	4544
ENST00000336735	SEL1L	Coding	Click Me	1	-0.253	153	-27.03	1	0	0	0	5425
ENST00000435030	KIF5C	Coding	Click Me	1	-0.223	140	-25.32	0	1	0	0	3689
ENST00000394243	SYNPO	Coding	Click Me	1	-0.17	150	-27.87	0	0	1	0	4186
ENST00000380911	CER1	Coding	Click Me	1	-0.342	192	-39.19	0	1	0	0	366
ENCT00000204295	CATG00000039101.1	Coding	Click Me	1	-0.245	158	-24.53	0	1	0	0	1000
ENST00000425394	PAN2	Coding	Click Me	1	-0.268	156	-33.57	0	1	0	0	1386
ENST00000344526	PRR27	Coding	Click Me	1	-0.206	152	-37.43	0	1	0	0	3948
ENST00000272462	MALL	Coding	Click Me	1	-0.18	144	-30.5	0	1	0	0	1825
ENST00000260129	TGS1	Coding	Click Me	1	-0.249	146	-32.23	0	1	0	0	3778
ENST00000382723	MSX1	Coding	Click Me	1	-0.211	150	-38.95	0	0	1	0	793
ENST00000347108	DZIP1	Coding	Click Me	1	-0.23	149	-25.89	0	1	0	0	4032
ENST00000344138	GRAP2	Coding	Click Me	1	-0.312	143	-33.33	0	1	0	0	7432
ENST00000308987	CKS1B	Coding	Click Me	1	-0.21	161	-33.9	0	1	0	0	2358
ENST00000397802	POLR3D	Coding	Click Me	1	-0.672	152	-28.5	1	0	0	0	4082
ENST00000357164	GM2A	Coding	Click Me	1	-0.204	163	-23.49	0	1	0	0	6441
ENST00000252699	ACTN4	Coding	Click Me	1	-0.397	142	-28.63	1	0	0	0	2155
ENST00000348159	MEF2D	Coding	Click Me	1	-0.197	140	-24.3	1	0	0	0	3918
ENST00000231498	NUP155	Coding	Click Me	1	-0.137	140	-37.57	0	1	0	0	5479
ENST00000357085	TRIM38	Coding	Click Me	1	-0.199	163	-33.21	1	0	0	0	7569
ENST00000324306	ZKSCAN1	Coding	Click Me	1	-0.163	147	-33.33	0	1	0	0	7513
ENST00000360564	MMP17	Coding	Click Me	1	-0.216	145	-28.36	0	0	1	0	497
ENST00000594154	ZNF432	Coding	Click Me	1	-0.377	146	-24.88	1	0	0	0	2361
ENST00000377346	PIK3CD	Coding	Click Me	1	-0.192	144	-20.77	0	1	0	0	1873
ENST00000256707	KIDINS220	Coding	Click Me	1	-0.543	140	-17.74	1	0	0	0	1863
ENST00000382247	DCAF16	Coding	Click Me	1	-0.264	141	-32.57	0	1	0	0	2836
ENST00000377223	LZIC	Coding	Click Me	1	-0.242	149	-27.58	0	1	0	0	4224
ENST00000246069	DSTN	Coding	Click Me	1	-0.199	140	-26.38	0	1	0	0	2786
ENST00000355621	UBE2H	Coding	Click Me	1	-0.364	149	-30.97	0	1	0	0	4205
ENST00000216484	SPTLC2	Coding	Click Me	1	-0.172	140	-28.87	0	1	0	0	6287
ENST00000389629	RTF1	Coding	Click Me	1	-0.169	148	-33.58	0	1	0	0	2876
ENST00000303225	FUT3	Coding	Click Me	1	-0.284	142	-26.1	0	1	0	0	866
ENST00000335251	INTU	Coding	Click Me	2	-0.277	316	-74.08	0	2	0	0	10301
ENST00000369787	KCNC4	Coding	Click Me	1	-0.187	168	-26.66	0	1	0	0	1743
ENST00000236980	FASTKD2	Coding	Click Me	1	-0.197	140	-31.59	0	1	0	0	4430
ENST00000375123	FOXE1	Coding	Click Me	1	-0.176	149	-25.39	0	1	0	0	3785
ENST00000251691	ARFGEF3	Coding	Click Me	1	-0.158	145	-32.15	0	1	0	0	8177
ENST00000398130	RELCH	Coding	Click Me	1	-0.26	144	-29.49	0	1	0	0	4546
ENST00000585482	SARM1	Coding	Click Me	1	-0.104	160	-23.9	0	1	0	0	7760
ENCT00000216401	CATG00000041280.1	Coding	Click Me	1	-0.199	145	-31.5	0	1	0	0	1000
ENST00000263334	PAX8	Coding	Click Me	1	-0.29	142	-30.56	1	0	0	0	2536
ENST00000336032	PNRC1	Coding	Click Me	1	-0.214	140	-32.55	0	1	0	0	4026
ENST00000381920	METTL22	Coding	Click Me	1	-0.171	141	-30.9	0	1	0	0	4605
ENST00000641258	OR2AG1	Coding	Click Me	1	-0.181	146	-23.59	0	1	0	0	5570
ENST00000532324	TATDN3	Coding	Click Me	1	-0.62	149	-21.65	1	0	0	0	441
ENST00000354336	CRKL	Coding	Click Me	1	-0.585	140	-22.82	1	0	0	0	3904
ENST00000245907	C3	Coding	Click Me	1	-0.241	140	-26.43	0	1	0	0	5088
ENST00000258770	TBRG4	Coding	Click Me	1	-0.224	147	-21.88	0	1	0	0	3044
ENST00000304506	IL13	Coding	Click Me	1	-0.457	169	-31.57	1	0	0	0	828
HBMT00001460774	CATG00000105296.1	Coding	Click Me	1	-0.208	144	-37.31	0	1	0	0	1000
ENST00000356884	BICD2	Coding	Click Me	1	-0.485	160	-29	1	0	0	0	3876
ENST00000422081	AC244197.3	Coding	Click Me	2	-0.286	287	-69.31	0	2	0	0	5756
ENST00000293414	ASB16	Coding	Click Me	1	-0.231	162	-34.19	0	1	0	0	3973
ENST00000261758	MESD	Coding	Click Me	1	-0.532	158	-28.32	1	0	0	0	3632
ENST00000262415	DHX8	Coding	Click Me	1	-0.134	163	-26.09	0	1	0	0	1823
ENST00000215793	SF3A1	Coding	Click Me	1	-0.165	144	-26.38	0	1	0	0	4611
ENST00000086933	GSC2	Coding	Click Me	1	-0.22	169	-29.5	0	1	0	0	2008
ENST00000417133	ERG	Coding	Click Me	1	-0.257	157	-30.32	1	0	0	0	3376
ENST00000366714	GJC2	Coding	Click Me	1	-0.268	142	-28.6	0	1	0	0	748
ENST00000400405	SIAH3	Coding	Click Me	1	-0.205	177	-37.47	0	1	0	0	3113
MICT00000275432	CATG00000074740.1	Coding	Click Me	1	-0.42	141	-40.57	1	0	0	0	1000
ENST00000503393	SH3BP2	Coding	Click Me	1	-0.137	149	-38.47	0	1	0	0	7262
ENST00000595753	SLC35E1	Coding	Click Me	1	-0.198	148	-32.59	0	1	0	0	4145
ENST00000244601	HIST1H2BG	Coding	Click Me	1	-0.257	148	-39.5	0	1	0	0	2845
ENST00000229829	HLA-DOA	Coding	Click Me	1	-0.135	150	-23.94	0	0	1	0	2660
ENCT00000429486	CATG00000100451.1	Coding	Click Me	1	-0.542	183	-37.1	1	0	0	0	1000
ENST00000536985	PFKFB3	Coding	Click Me	1	-0.123	145	-31.07	0	1	0	0	3293
ENST00000599359	TNFSF14	Coding	Click Me	1	-0.368	140	-31.59	0	1	0	0	371
ENST00000265381	APBA1	Coding	Click Me	1	-0.223	148	-29.67	0	1	0	0	3797
ENST00000392562	GRB2	Coding	Click Me	1	-0.269	148	-33.23	0	1	0	0	2292
uc001dmr.2	KYAT3	Coding	Click Me	1	-0.451	142	-28.14	0	1	0	0	410
ENST00000394752	SFMBT1	Coding	Click Me	1	-0.159	144	-22.7	0	0	1	0	5901
ENST00000477892	FAM162A	Coding	Click Me	1	-0.141	168	-28.52	0	1	0	0	2524
ENST00000619578	UNC13B	Coding	Click Me	1	-0.228	165	-29.61	0	1	0	0	1301
HBMT00000736073	CATG00000040897.1	Coding	Click Me	1	-0.305	142	-28.86	0	1	0	0	1000
ENST00000361875	TSC22D2	Coding	Click Me	1	-0.249	156	-35.05	0	1	0	0	7795
ENST00000535453	APC2	Coding	Click Me	1	-0.218	171	-29.87	0	1	0	0	3031
ENST00000379687	BCLAF3	Coding	Click Me	1	-0.318	140	-28.3	0	1	0	0	4445
ENST00000392845	SLC33A1	Coding	Click Me	2	-0.527	297	-67.58	0	2	0	0	7186
ENST00000238831	YIPF4	Coding	Click Me	1	-0.144	140	-31.42	0	1	0	0	10968
ENST00000265071	CDH6	Coding	Click Me	1	-0.366	145	-25.66	1	0	0	0	5838
ENST00000253144	ZNF331	Coding	Click Me	1	-0.314	149	-32.87	0	1	0	0	2317
ENST00000378933	TAB3	Coding	Click Me	1	-0.102	166	-26.24	0	1	0	0	3985
ENST00000254942	TERF2	Coding	Click Me	1	-0.147	156	-25.88	0	1	0	0	3467
ENST00000447944	PNPT1	Coding	Click Me	1	-0.202	144	-33.1	0	1	0	0	2174
ENST00000368476	CHRNB2	Coding	Click Me	2	-0.403	318	-59.07	1	1	0	0	4094
ENST00000263354	NAPA	Coding	Click Me	1	-0.266	141	-26.17	0	1	0	0	1862
ENST00000278379	SLC1A2	Coding	Click Me	1	-0.602	169	-25.04	1	0	0	0	9689
ENST00000338010	ZNF385A	Coding	Click Me	1	-0.136	183	-34.59	0	1	0	0	1116
ENST00000343938	CPTP	Coding	Click Me	1	-0.192	147	-25.97	0	0	1	0	1134
ENST00000454349	TNRC6B	Coding	Click Me	1	-0.163	156	-34.6	0	1	0	0	12566
ENST00000614012	MR1	Coding	Click Me	1	-0.153	145	-35.3	0	1	0	0	6673
ENST00000536272	KIAA1958	Coding	Click Me	1	-0.146	140	-31.59	0	1	0	0	5240
ENST00000367362	NR5A2	Coding	Click Me	1	-0.583	153	-26.96	1	0	0	0	3214
ENST00000396872	SLC29A4	Coding	Click Me	1	-0.214	140	-24.61	0	0	1	0	3931
ENST00000374142	ZDHHC18	Coding	Click Me	1	-0.252	177	-30.05	0	1	0	0	3758
ENST00000330914	TUBB	Coding	Click Me	1	-0.317	146	-20.33	0	1	0	0	1029
ENST00000296490	WDR82	Coding	Click Me	1	-0.262	149	-32.14	0	1	0	0	3085
ENST00000375754	SYK	Coding	Click Me	1	-0.202	140	-31.59	0	1	0	0	2960
ENST00000381854	CDC37L1	Coding	Click Me	1	-0.384	150	-20.68	0	1	0	0	2286
ENST00000238788	TMEM214	Coding	Click Me	1	-0.295	144	-30.71	0	1	0	0	1068
ENST00000641693	OR2A5	Coding	Click Me	1	-0.221	151	-29.04	1	0	0	0	7508
ENST00000392432	TMEM44	Coding	Click Me	1	-0.111	152	-24.09	0	1	0	0	4050
ENST00000373479	RNF8	Coding	Click Me	1	-0.276	151	-29.22	0	1	0	0	3980
ENST00000392185	SNX9	Coding	Click Me	1	-0.483	142	-29.27	1	0	0	0	2239
ENST00000531323	C11orf83	Coding	Click Me	1	-0.212	140	-28.01	0	1	0	0	1463
ENST00000369905	ACTR1A	Coding	Click Me	1	-0.212	146	-38.52	0	1	0	0	3081
ENST00000421807	INPP5K	Coding	Click Me	1	-0.403	151	-25.29	0	1	0	0	1254
ENST00000443905	ZNF506	Coding	Click Me	1	-0.302	151	-30.34	0	1	0	0	1392
ENST00000623960	FP565260.3	Coding	Click Me	1	-0.202	161	-31.14	0	1	0	0	2179
ENST00000397621	FBXL16	Coding	Click Me	1	-0.177	144	-29.37	0	0	1	0	1775
ENST00000420886	SBNO1	Coding	Click Me	1	-0.161	141	-25.59	0	1	0	0	6799
ENST00000307641	NKIRAS2	Coding	Click Me	1	-0.237	148	-38.11	0	1	0	0	1748
ENST00000586790	CCDC106	Coding	Click Me	1	-0.198	147	-32.72	0	1	0	0	415
ENST00000232564	GNB4	Coding	Click Me	1	-0.141	140	-31.59	0	1	0	0	5125
ENST00000341865	C6orf132	Coding	Click Me	1	-0.228	151	-30.61	0	1	0	0	3455
ENST00000361505	PNP	Coding	Click Me	1	-0.22	157	-26.51	0	1	0	0	5350
ENST00000323777	HSF5	Coding	Click Me	1	-0.231	165	-26.04	0	1	0	0	2193
MICT00000235293	CATG00000057919.1	Coding	Click Me	1	-0.298	147	-30.76	0	1	0	0	1000
ENST00000633930	NHSL2	Coding	Click Me	1	-0.398	166	-23.86	1	0	0	0	9712
NM_001279350	REXO4	Coding	Click Me	1	-0.26	152	-29.69	0	1	0	0	895
ENST00000616417	FMN1	Coding	Click Me	1	-0.143	167	-28.86	1	0	0	0	8765
ENST00000346541	CBFA2T2	Coding	Click Me	1	-0.287	173	-38.47	0	1	0	0	5385
ENST00000389677	FAXC	Coding	Click Me	1	-0.213	144	-26.38	0	1	0	0	9995
ENST00000236959	ATIC	Coding	Click Me	1	-0.315	148	-20	1	0	0	0	3460
ENST00000316963	LYPLA1	Coding	Click Me	1	-0.291	152	-37.53	0	1	0	0	5078
ENST00000243457	KCNJ2	Coding	Click Me	1	-0.448	143	-25.8	1	0	0	0	3725
ENST00000409638	STK16	Coding	Click Me	1	-0.203	152	-32.17	0	1	0	0	1778
ENST00000219689	USP31	Coding	Click Me	1	-0.187	141	-25.89	0	1	0	0	6640
ENST00000613950	ZNF761	Coding	Click Me	1	-0.357	140	-32.91	0	1	0	0	401
ENST00000264433	FNIP2	Coding	Click Me	1	-0.154	151	-29.54	0	1	0	0	3505
ENCT00000260927	CATG00000053107.1	Coding	Click Me	1	-0.278	142	-25.2	0	1	0	0	1000
ENCT00000380453	CATG00000086946.1	Coding	Click Me	1	-0.233	142	-27.96	0	1	0	0	1000
ENST00000318978	CTXN1	Coding	Click Me	1	-0.146	140	-30.86	0	1	0	0	845
ENST00000379170	MCUR1	Coding	Click Me	1	-0.256	140	-27.77	0	1	0	0	4275
ENST00000328439	MYT1	Coding	Click Me	1	-0.179	147	-32.97	0	1	0	0	1805
ENST00000371935	REXO4	Coding	Click Me	1	-0.26	152	-29.69	0	1	0	0	894
ENST00000469217	PCCB	Coding	Click Me	1	-0.249	140	-31.59	0	1	0	0	2588
ENST00000285018	WNT7A	Coding	Click Me	1	-0.211	142	-30.48	0	1	0	0	2686
ENST00000255688	RARRES3	Coding	Click Me	1	-0.286	152	-29.36	0	1	0	0	2349
ENST00000267549	GPR65	Coding	Click Me	1	-0.174	145	-19.23	0	1	0	0	3002
ENST00000445217	ZNF793	Coding	Click Me	1	-0.175	140	-31.59	0	1	0	0	5458
ENST00000395176	DNAJC30	Coding	Click Me	2	-0.776	292	-62.68	1	1	0	0	2878
ENST00000263697	DNAJC8	Coding	Click Me	1	-0.203	175	-28.18	0	1	0	0	969
ENST00000374360	DLG3	Coding	Click Me	1	-0.263	168	-31.58	1	0	0	0	3218
ENST00000524377	NTRK1	Coding	Click Me	1	-0.322	154	-38.21	0	1	0	0	50
ENST00000369886	SAMD10	Coding	Click Me	1	-0.151	147	-26.06	0	1	0	0	1397
ENST00000255390	SCO1	Coding	Click Me	1	-0.113	149	-38.13	0	1	0	0	8645
ENST00000353609	FOSB	Coding	Click Me	1	-0.124	145	-27.94	0	0	1	0	2166
ENST00000321792	RBMXL1	Coding	Click Me	1	-0.282	142	-18.65	1	0	0	0	3209
ENST00000393310	LIMS1	Coding	Click Me	1	-0.191	157	-33.77	0	1	0	0	3247
ENST00000276461	ERLIN2	Coding	Click Me	1	-0.167	140	-33.47	0	1	0	0	4986
ENST00000449870	ILF3	Coding	Click Me	1	-0.354	154	-25.11	0	1	0	0	3107
ENCT00000187197	CATG00000034566.1	Coding	Click Me	1	-0.256	173	-36.01	0	1	0	0	1000
ENST00000355468	LEPREL4	Coding	Click Me	1	-0.344	144	-33.13	0	1	0	0	1010
ENST00000595646	ZNF468	Coding	Click Me	1	-0.626	141	-26.28	1	0	0	0	4886
ENST00000371942	REXO4	Coding	Click Me	1	-0.255	152	-29.69	0	1	0	0	928
ENST00000610213	DCP1A	Coding	Click Me	1	-0.176	140	-31.59	0	1	0	0	4150
ENST00000371586	CC2D1B	Coding	Click Me	1	-0.432	146	-30.64	1	0	0	0	3921
ENST00000345094	THUMPD3	Coding	Click Me	1	-0.233	140	-31.59	0	1	0	0	4638
ENST00000281441	TMEM45B	Coding	Click Me	1	-0.225	140	-36.99	0	1	0	0	2579
ENST00000288050	PDPR	Coding	Click Me	1	-0.242	160	-22.38	1	0	0	0	5658
ENCT00000084957	CATG00000007582.1	Coding	Click Me	1	-0.239	158	-25.92	0	1	0	0	1000
ENST00000370693	BAG2	Coding	Click Me	1	-0.236	150	-21.51	0	1	0	0	5643
ENST00000356079	CYP20A1	Coding	Click Me	2	-0.326	286	-62.31	0	2	0	0	12850
ENST00000622824	B3GNT6	Coding	Click Me	1	-0.351	141	-37.63	0	1	0	0	1267
ENST00000642046	OR51M1	Coding	Click Me	1	-0.271	144	-29.74	0	1	0	0	2884
ENST00000447370	SIGLEC11	Coding	Click Me	1	-0.349	140	-31.59	0	1	0	0	985
ENST00000395699	PURB	Coding	Click Me	1	-0.175	144	-33.4	0	1	0	0	8117
ENST00000372890	TRUB2	Coding	Click Me	1	-0.149	144	-26.38	0	1	0	0	4655
ENST00000392477	NCOA7	Coding	Click Me	1	-0.322	143	-27.59	1	0	0	0	3259
ENST00000337532	MPP7	Coding	Click Me	1	-0.28	145	-29.58	0	1	0	0	3072
ENST00000370491	KYAT3	Coding	Click Me	1	-0.451	142	-28.14	0	1	0	0	410
ENST00000358011	C1orf109	Coding	Click Me	1	-0.164	140	-28.7	0	1	0	0	1553
ENST00000348165	UBE3C	Coding	Click Me	1	-0.148	165	-30.41	0	1	0	0	1617
ENST00000373330	ZMYM1	Coding	Click Me	1	-0.209	148	-33.37	0	1	0	0	3562
ENST00000273853	CENPC	Coding	Click Me	1	-0.248	148	-36.66	0	1	0	0	3844
ENST00000368068	MED23	Coding	Click Me	1	-0.335	161	-20.28	0	1	0	0	953
ENST00000368069	COPA	Coding	Click Me	1	-0.211	150	-27.94	0	1	0	0	1575
ENST00000454077	ATXN7L3	Coding	Click Me	1	-0.175	148	-24.74	0	1	0	0	2469
ENST00000368704	S100A16	Coding	Click Me	1	-0.183	145	-32.15	0	1	0	0	3003
ENST00000377038	DFFA	Coding	Click Me	1	-0.174	144	-36.99	0	1	0	0	4968
ENST00000370187	BTRC	Coding	Click Me	1	-0.505	160	-29.59	1	0	0	0	4198
ENST00000358495	RAD52	Coding	Click Me	1	-0.231	149	-27.64	0	1	0	0	2367
ENST00000297130	MYOZ3	Coding	Click Me	1	-0.195	180	-41.55	0	1	0	0	2759
ENST00000517392	CEP57L1	Coding	Click Me	1	-0.17	141	-30.9	0	1	0	0	5129
ENST00000228606	CYP27B1	Coding	Click Me	1	-0.337	145	-26.32	0	1	0	0	3390
ENST00000002125	NDUFAF7	Coding	Click Me	1	-0.301	165	-33.92	0	1	0	0	810
ENST00000382824	FBXO25	Coding	Click Me	1	-0.103	175	-28.61	0	1	0	0	9163
ENST00000607772	CNKSR3	Coding	Click Me	1	-0.296	146	-23.69	1	0	0	0	18850
ENST00000327892	TUBB	Coding	Click Me	1	-0.317	146	-20.33	0	1	0	0	1030
ENST00000253413	ATP6V1E1	Coding	Click Me	1	-0.12	140	-30.44	0	1	0	0	2133
ENST00000626650	ZNF280B	Coding	Click Me	1	-0.13	184	-35.8	0	1	0	0	3324
ENST00000239374	CCDC170	Coding	Click Me	1	-0.544	153	-22.44	1	0	0	0	3046
ENST00000251287	HCN2	Coding	Click Me	1	-0.225	141	-26.92	0	0	1	0	685
ENST00000396594	GNE	Coding	Click Me	1	-0.236	144	-32.14	0	1	0	0	2924
ENST00000566228	SNX29	Coding	Click Me	1	-0.257	151	-25.44	0	1	0	0	5660
ENST00000424196	EIF4G1	Coding	Click Me	1	-0.193	173	-35.91	0	1	0	0	443
ENST00000265986	IDE	Coding	Click Me	1	-0.272	157	-36.93	0	1	0	0	4429
ENST00000308696	PSMD1	Coding	Click Me	1	-0.269	146	-23.8	0	1	0	0	1887
ENST00000338230	ZNF600	Coding	Click Me	1	-0.307	148	-35.97	0	1	0	0	1392
ENST00000257408	KLB	Coding	Click Me	1	-0.196	148	-35.97	0	1	0	0	2850
ENST00000606320	MPHOSPH9	Coding	Click Me	1	-0.105	143	-33.44	0	1	0	0	2592
ENST00000306336	C2orf68	Coding	Click Me	1	-0.204	163	-24.69	0	1	0	0	4796
MICT00000227401	CATG00000056958.1	Coding	Click Me	1	-0.324	156	-39.14	0	1	0	0	1000
ENST00000539575	MVK	Coding	Click Me	1	-0.2	140	-30.16	0	0	1	0	1540
ENST00000373640	C2orf72	Coding	Click Me	1	-0.296	145	-31.59	0	1	0	0	5605
ENST00000255192	BHMT2	Coding	Click Me	1	-0.272	140	-33.4	0	1	0	0	1607
ENST00000252891	NUMBL	Coding	Click Me	1	-0.271	146	-34.56	0	1	0	0	1561
ENST00000262518	SRCAP	Coding	Click Me	1	-0.206	149	-34.23	0	0	1	0	4548
ENST00000360264	CUX1	Coding	Click Me	1	-0.211	144	-27.44	1	0	0	0	9191
ENST00000611716	PCSK6	Coding	Click Me	1	-0.173	147	-35.21	0	0	1	0	1330
ENST00000396623	ADHFE1	Coding	Click Me	1	-0.165	161	-40.95	0	1	0	0	2116
ENST00000258436	MFSD9	Coding	Click Me	1	-0.117	160	-25.58	0	1	0	0	4590
ENST00000356628	NRARP	Coding	Click Me	1	-0.113	160	-35.24	0	1	0	0	1953
ENST00000327423	PRR14L	Coding	Click Me	1	-0.3	150	-28.42	1	0	0	0	4180
ENST00000641568	AP003071.5	Coding	Click Me	1	-0.204	158	-30.63	0	1	0	0	1656
ENST00000379757	TXNDC5	Coding	Click Me	1	-0.26	142	-24.47	0	1	0	0	1627
ENST00000642117	OR4Q3	Coding	Click Me	1	-0.398	145	-32.15	0	1	0	0	1100
ENST00000330714	MX2	Coding	Click Me	1	-0.302	154	-33.78	0	1	0	0	1812
ENST00000370695	SLC9A6	Coding	Click Me	1	-0.23	143	-27.76	0	1	0	0	2543
ENST00000380155	SYAP1	Coding	Click Me	1	-0.261	140	-31.59	0	1	0	0	6797
ENST00000332836	NLRP9	Coding	Click Me	1	-0.22	141	-25.69	0	1	0	0	5340
ENST00000273590	TCTA	Coding	Click Me	1	-0.319	140	-31.59	0	1	0	0	1614
ENST00000519065	HDAC2	Coding	Click Me	1	-0.165	156	-26.61	0	1	0	0	8030
ENST00000288014	THTPA	Coding	Click Me	1	-0.331	144	-24.58	0	1	0	0	1462
ENST00000344204	TRIO	Coding	Click Me	1	-0.235	145	-26.09	0	0	1	0	1782
ENST00000314994	CENPBD1	Coding	Click Me	1	-0.281	141	-29.81	0	1	0	0	1595
ENST00000536441	SESN3	Coding	Click Me	2	-0.533	311	-46.94	0	2	0	0	7742
ENST00000270139	IFNAR1	Coding	Click Me	1	-0.335	140	-31.59	0	1	0	0	6430
MICT00000227796	CATG00000056258.1	Coding	Click Me	1	-0.374	147	-34.42	0	1	0	0	1000
ENST00000596143	ZNF714	Coding	Click Me	1	-0.259	140	-31.59	0	1	0	0	6748
ENST00000388975	SEPT14	Coding	Click Me	1	-0.212	152	-36.24	0	1	0	0	2369
MICT00000053524	CATG00000001397.1	Coding	Click Me	1	-0.201	171	-42.55	0	1	0	0	1000
ENST00000366607	TOMM20	Coding	Click Me	1	-0.195	163	-32.51	0	1	0	0	2764
ENST00000252483	NECTIN2	Coding	Click Me	1	-0.276	162	-40.54	0	1	0	0	1873
ENST00000601673	FLJ20306	Coding	Click Me	1	-0.333	144	-37.17	0	1	0	0	851
ENST00000419147	CROT	Coding	Click Me	1	-0.353	151	-34.7	0	1	0	0	837
ENST00000573035	GTF2I	Coding	Click Me	1	-0.189	154	-32.08	0	1	0	0	1162
ENST00000266517	ETNK1	Coding	Click Me	1	-0.199	155	-22.24	0	1	0	0	5736
ENST00000282388	ZFP36L2	Coding	Click Me	1	-0.246	160	-32.21	0	1	0	0	4391
ENST00000418331	PTPRJ	Coding	Click Me	1	-0.499	160	-33.76	1	0	0	0	3480
ENST00000568107	GAN	Coding	Click Me	1	-0.17	141	-29.91	0	1	0	0	13288
ENST00000358595	ARNT	Coding	Click Me	1	-0.192	151	-26.18	0	1	0	0	2316
ENST00000257868	GDF11	Coding	Click Me	1	-0.3	141	-28.87	0	1	0	0	4101
uc001wlf.3	DHRS4L2	Coding	Click Me	1	-0.251	159	-25.34	0	1	0	0	1832
ENST00000346872	IKZF3	Coding	Click Me	1	-0.156	149	-32.14	0	1	0	0	8075
ENST00000319080	MLXIP	Coding	Click Me	1	-0.483	148	-22.98	1	0	0	0	5535
ENST00000553781	BCL2L2-PABPN1	Coding	Click Me	1	-0.285	147	-30.79	0	1	0	0	903
ENST00000318336	FUT6	Coding	Click Me	1	-0.297	142	-26.1	0	1	0	0	862
ENST00000216027	HSCB	Coding	Click Me	1	-0.339	143	-35.79	0	1	0	0	341
ENST00000277165	FAM120A	Coding	Click Me	1	-0.289	154	-20.02	0	1	0	0	1567
ENST00000643399	HK1	Coding	Click Me	1	-0.258	156	-25.17	0	1	0	0	747
ENST00000641817	OR51D1	Coding	Click Me	1	-0.281	140	-31.59	0	1	0	0	2295
ENST00000238892	CRIPT	Coding	Click Me	1	-0.193	148	-23.72	0	1	0	0	6511
ENST00000641810	OR2A42	Coding	Click Me	1	-0.102	161	-23.01	0	1	0	0	3667
ENST00000298510	PRDX3	Coding	Click Me	1	-0.362	142	-18.15	0	1	0	0	777
ENST00000269439	RNF165	Coding	Click Me	1	-0.116	152	-32.72	0	1	0	0	6513
ENST00000343280	ZNF772	Coding	Click Me	1	-0.194	147	-29.6	0	0	1	0	3688
ENST00000373264	CDK9	Coding	Click Me	1	-0.301	153	-31.99	0	1	0	0	3564
ENST00000376414	GPR183	Coding	Click Me	1	-0.531	170	-31.09	1	0	0	0	3414
ENST00000223210	ZNF862	Coding	Click Me	1	-0.142	146	-40.33	0	0	1	0	3195
ENST00000641200	OR4M1	Coding	Click Me	1	-0.265	151	-27.42	0	1	0	0	2432
ENST00000644224	SLC19A3	Coding	Click Me	1	-0.288	141	-25.58	0	1	0	0	3634
FTMT24200007542	CATG00000007425.1	Coding	Click Me	1	-0.523	150	-22.68	1	0	0	0	1000
ENST00000372852	HEYL	Coding	Click Me	1	-0.154	149	-27.07	0	1	0	0	12884
ENST00000373857	PTAFR	Coding	Click Me	1	-0.337	145	-32.15	0	1	0	0	3744
ENST00000589042	TTN	Coding	Click Me	1	-0.44	142	-30.07	0	1	0	0	1023
ENST00000216727	PABPN1	Coding	Click Me	1	-0.285	147	-30.79	0	1	0	0	903
ENST00000307921	ADAT1	Coding	Click Me	2	-0.319	299	-64.54	0	2	0	0	5306
ENST00000322054	EHD3	Coding	Click Me	1	-0.281	140	-26.9	1	0	0	0	8664
ENST00000610020	RPAP2	Coding	Click Me	2	-0.497	299	-61.08	1	1	0	0	15046
ENST00000517309	PTDSS1	Coding	Click Me	1	-0.31	151	-31.2	0	1	0	0	3765
ENST00000314607	ZMYM4	Coding	Click Me	1	-0.274	143	-30.21	0	1	0	0	3535
ENST00000315732	LSM10	Coding	Click Me	1	-0.132	147	-35.81	0	1	0	0	3641
ENST00000323169	ZNF491	Coding	Click Me	1	-0.241	153	-36.38	0	1	0	0	1831
ENST00000075120	SLC2A3	Coding	Click Me	1	-0.257	140	-32.54	0	1	0	0	2185
ENST00000432825	FBXO10	Coding	Click Me	1	-0.424	143	-26.59	1	0	0	0	1655
ENST00000355072	HTT	Coding	Click Me	1	-0.107	148	-25.06	0	1	0	0	3890
ENST00000277541	NOTCH1	Coding	Click Me	1	-0.231	148	-28.42	0	1	0	0	1627
ENST00000264454	SEC22C	Coding	Click Me	1	-0.195	144	-29.89	0	1	0	0	5281
ENST00000264451	SLC30A9	Coding	Click Me	1	-0.157	163	-38.45	0	1	0	0	4331
ENST00000305786	CYCS	Coding	Click Me	1	-0.151	154	-29.99	0	1	0	0	5474
ENST00000319231	KCNK10	Coding	Click Me	1	-0.263	156	-37.61	0	1	0	0	642
ENST00000261520	ICE2	Coding	Click Me	1	-0.151	155	-35.21	0	1	0	0	4025
ENST00000300035	PCLAF	Coding	Click Me	1	-0.276	142	-28.61	0	1	0	0	5066
ENST00000252506	GADD45G	Coding	Click Me	2	-0.795	309	-53.23	1	1	0	0	2562
ENST00000324679	SAV1	Coding	Click Me	1	-0.314	140	-32.24	0	1	0	0	1603
ENST00000382496	SEMA5A	Coding	Click Me	1	-0.131	164	-30.29	0	1	0	0	7871
ENST00000251089	ANGEL1	Coding	Click Me	1	-0.317	152	-33.88	0	1	0	0	3230
ENST00000319863	GATD1	Coding	Click Me	1	-0.146	144	-32.6	0	1	0	0	4208
ENST00000318962	ALS2CL	Coding	Click Me	1	-0.137	168	-33.68	0	1	0	0	1989
ENST00000612892	GPR1	Coding	Click Me	1	-0.356	145	-32.15	0	1	0	0	860
ENST00000395862	ATP6V1C1	Coding	Click Me	1	-0.264	150	-28.62	1	0	0	0	5199
ENST00000395863	BMP7	Coding	Click Me	1	-0.23	140	-31.59	0	1	0	0	2211
ENST00000338560	TRPV2	Coding	Click Me	2	-0.393	289	-66.11	0	2	0	0	5180
ENST00000493763	RPL7L1	Coding	Click Me	1	-0.315	148	-27.22	0	1	0	0	3519
ENST00000370200	KAZALD1	Coding	Click Me	1	-0.224	146	-25.82	1	0	0	0	3922
MICT00000164793	CATG00000038121.1	Coding	Click Me	1	-0.321	149	-32.14	0	1	0	0	1000
ENST00000366935	GPATCH2	Coding	Click Me	1	-0.105	142	-28.64	0	1	0	0	4153
ENST00000166244	EPHA8	Coding	Click Me	1	-0.316	150	-26.05	1	0	0	0	1853
ENCT00000050618	CATG00000116608.1	Coding	Click Me	1	-0.562	149	-31.02	1	0	0	0	1000
ENST00000374810	TP53INP2	Coding	Click Me	1	-0.1	153	-25.58	0	1	0	0	3132
ENST00000621332	MLLT6	Coding	Click Me	1	-0.158	155	-33.61	0	1	0	0	4205
ENST00000527748	GPR61	Coding	Click Me	1	-0.304	149	-23.72	0	1	0	0	2882
ENST00000295958	SMIM14	Coding	Click Me	1	-0.176	151	-34.75	0	1	0	0	5796
ENST00000347635	NUP50	Coding	Click Me	1	-0.203	142	-34.07	0	0	1	0	3360
ENST00000302279	FNTA	Coding	Click Me	1	-0.533	148	-27.27	1	0	0	0	507
ENST00000321998	COQ7	Coding	Click Me	1	-0.189	144	-33.66	0	1	0	0	5700
ENST00000323699	DEGS1	Coding	Click Me	1	-0.251	148	-33.78	0	1	0	0	963
ENST00000435205	FAM160A1	Coding	Click Me	1	-0.272	151	-25.12	0	1	0	0	884
ENST00000423981	AMER3	Coding	Click Me	1	-0.303	140	-33.97	0	1	0	0	3476
ENST00000274773	TRIM7	Coding	Click Me	1	-0.242	148	-31.28	0	1	0	0	4116
ENST00000262430	MLYCD	Coding	Click Me	1	-0.339	145	-24.56	0	1	0	0	698
ENST00000424789	TANC2	Coding	Click Me	1	-0.523	149	-25.14	1	0	0	0	5751
ENST00000307659	KIAA0232	Coding	Click Me	1	-0.175	174	-33.71	0	1	0	0	3198
ENST00000544547	LIMS1	Coding	Click Me	1	-0.192	157	-33.77	0	1	0	0	3239
ENST00000378217	OLAH	Coding	Click Me	1	-0.31	141	-31.41	0	1	0	0	623
ENST00000392781	B3GALNT1	Coding	Click Me	1	-0.414	147	-23.37	0	1	0	0	1876
ENST00000378748	OPTN	Coding	Click Me	1	-0.588	140	-28.15	1	0	0	0	1425
MICT00000368546	CATG00000110053.1	Coding	Click Me	1	-0.281	141	-28.39	0	1	0	0	1000
ENST00000620116	ZNF501	Coding	Click Me	1	-0.404	141	-18.62	0	1	0	0	1846
ENST00000371384	FAM210B	Coding	Click Me	1	-0.213	140	-31.89	0	1	0	0	2376
ENST00000503039	ZNF346	Coding	Click Me	1	-0.239	154	-38.17	0	1	0	0	1810
ENST00000334956	PARVA	Coding	Click Me	1	-0.131	140	-26.51	1	0	0	0	7451
ENST00000265807	SH2D4A	Coding	Click Me	1	-0.151	143	-30.44	0	1	0	0	4306
ENST00000432648	AKIRIN1	Coding	Click Me	1	-0.169	149	-36.1	0	1	0	0	3638
ENST00000407780	ICOSLG	Coding	Click Me	1	-0.202	161	-31.14	0	1	0	0	6043
ENST00000219548	STUB1	Coding	Click Me	1	-0.505	178	-32.83	1	0	0	0	325
ENST00000346834	SLC4A5	Coding	Click Me	1	-0.26	144	-33.34	0	1	0	0	2583
ENST00000320785	KIF1C	Coding	Click Me	1	-0.175	143	-30.23	0	1	0	0	6285
ENST00000328195	PLPBP	Coding	Click Me	1	-0.247	148	-29.48	0	1	0	0	1664
ENST00000299413	TRIM44	Coding	Click Me	1	-0.172	142	-16.46	0	1	0	0	11628
ENST00000587989	TMUB2	Coding	Click Me	1	-0.236	161	-26.61	0	1	0	0	850
ENST00000217173	UBOX5	Coding	Click Me	1	-0.162	160	-30.08	0	1	0	0	2533
ENST00000247883	TAS2R5	Coding	Click Me	1	-0.229	144	-25.27	0	1	0	0	3227
ENST00000319286	ZNF572	Coding	Click Me	1	-0.288	154	-20.63	0	1	0	0	1533
ENCT00000268622	CATG00000055392.1	Coding	Click Me	1	-0.276	151	-28.46	0	1	0	0	1000
ENST00000317243	ZNF554	Coding	Click Me	1	-0.176	147	-25.95	0	1	0	0	3974
ENST00000253122	SLC6A8	Coding	Click Me	1	-0.416	159	-21.8	1	0	0	0	1379
ENST00000292566	ALKBH4	Coding	Click Me	1	-0.331	140	-34.56	0	1	0	0	1174
ENST00000262809	ELL	Coding	Click Me	1	-0.183	158	-29.31	0	1	0	0	2121
ENST00000328600	NLRP10	Coding	Click Me	1	-0.212	143	-36.43	0	1	0	0	2108
ENST00000225724	GOSR1	Coding	Click Me	1	-0.172	145	-30.55	0	0	1	0	5968
ENST00000260731	KIF11	Coding	Click Me	1	-0.317	143	-28.02	0	1	0	0	1599
ENST00000376510	MSRB2	Coding	Click Me	1	-0.152	153	-34.91	0	1	0	0	5912
ENST00000484457	FBXL2	Coding	Click Me	1	-0.268	148	-37.16	0	1	0	0	2484
ENST00000296280	MASP1	Coding	Click Me	1	-0.201	140	-29.67	0	1	0	0	1602
ENST00000267377	SSTR1	Coding	Click Me	1	-0.133	151	-34.1	0	1	0	0	2505
ENST00000394132	TTC23	Coding	Click Me	1	-0.166	146	-26.58	0	1	0	0	1687
ENST00000645273	KDR	Coding	Click Me	1	-0.359	141	-22.8	0	1	0	0	1682
ENCT00000068596	CATG00000002734.1	Coding	Click Me	1	-0.202	163	-29.68	0	1	0	0	1000
HBMT00000321733	CATG00000010947.1	Coding	Click Me	1	-0.275	154	-39.75	0	1	0	0	1000
ENST00000367267	SYT2	Coding	Click Me	1	-0.189	140	-24.81	0	1	0	0	6161
ENST00000258201	FHOD1	Coding	Click Me	1	-0.347	145	-27.49	0	1	0	0	247
ENST00000310298	PDE8A	Coding	Click Me	1	-0.267	165	-32.45	0	1	0	0	1253
ENST00000281834	TNFSF4	Coding	Click Me	1	-0.275	162	-23.56	0	1	0	0	2781
ENST00000304385	TMEM154	Coding	Click Me	1	-0.119	155	-22.49	0	1	0	0	9914
ENST00000306503	SOCS5	Coding	Click Me	1	-0.317	142	-23.88	1	0	0	0	6583
ENST00000609438	GPRIN3	Coding	Click Me	1	-0.113	152	-33.38	0	1	0	0	11407
ENST00000446197	DCAF11	Coding	Click Me	1	-0.322	147	-31.74	0	1	0	0	1939
ENST00000405846	GPR12	Coding	Click Me	1	-0.187	140	-31.38	0	1	0	0	3621
ENST00000443751	MIGA1	Coding	Click Me	1	-0.268	143	-30.6	1	0	0	0	4475
ENST00000552864	LIN7A	Coding	Click Me	1	-0.353	145	-22.53	0	1	0	0	5207
ENST00000615540	PDLIM5	Coding	Click Me	1	-0.287	140	-31.59	0	1	0	0	4160
ENST00000262144	WDR59	Coding	Click Me	1	-0.208	144	-32.9	0	1	0	0	2843
ENST00000582783	C19orf47	Coding	Click Me	1	-0.247	145	-26.84	0	1	0	0	2346
ENCT00000412861	CATG00000096113.1	Coding	Click Me	1	-0.191	157	-31.35	0	1	0	0	1000
ENST00000380421	PIR	Coding	Click Me	1	-0.4	161	-29.11	0	1	0	0	205
ENST00000263095	ZNF264	Coding	Click Me	1	-0.293	159	-37.5	0	1	0	0	9865
HBMT00000170004	CATG00000000429.1	Coding	Click Me	1	-0.185	163	-35.01	0	1	0	0	1000
ENST00000373451	CMTR1	Coding	Click Me	1	-0.254	152	-28.36	0	1	0	0	1370
ENST00000264995	MRPL3	Coding	Click Me	1	-0.194	159	-28.3	1	0	0	0	7638
ENST00000504401	ROPN1B	Coding	Click Me	1	-0.307	149	-24.09	0	1	0	0	1624
ENST00000263092	METTL16	Coding	Click Me	1	-0.221	143	-30.44	0	1	0	0	3916
ENST00000357618	HFE	Coding	Click Me	1	-0.291	146	-22.83	1	0	0	0	4117
ENST00000263256	DESI1	Coding	Click Me	1	-0.174	145	-32.15	0	1	0	0	3069
ENST00000215838	TCN2	Coding	Click Me	1	-0.26	163	-31.26	0	1	0	0	4170
ENST00000401061	MMACHC	Coding	Click Me	1	-0.217	156	-38.78	0	1	0	0	1852
ENST00000376585	MTHFR	Coding	Click Me	1	-0.198	162	-29.93	0	1	0	0	4948
ENST00000383168	AQP4	Coding	Click Me	1	-0.165	175	-25.94	0	1	0	0	4173
ENST00000333480	MAFA	Coding	Click Me	1	-0.239	168	-34.37	0	1	0	0	1285
ENST00000336576	DNAJB2	Coding	Click Me	1	-0.125	166	-37.01	0	1	0	0	1913
ENST00000304760	SHE	Coding	Click Me	1	-0.33	149	-22.56	0	1	0	0	4671
ENST00000344836	USP7	Coding	Click Me	1	-0.519	151	-22.3	1	0	0	0	1904
ENCT00000303512	CATG00000064650.1	Coding	Click Me	2	-0.361	339	-72.56	0	2	0	0	1000
ENST00000337273	TNPO1	Coding	Click Me	1	-0.187	148	-24.25	0	1	0	0	8060
ENST00000277570	PROSER2	Coding	Click Me	1	-0.431	150	-27.77	1	0	0	0	4095
ENST00000306875	COG8	Coding	Click Me	1	-0.203	154	-31.97	0	1	0	0	4594
MICT00000281967	CATG00000079699.1	Coding	Click Me	1	-0.589	142	-22.6	1	0	0	0	1000
ENST00000487099	NR6A1	Coding	Click Me	1	-0.108	140	-22.29	0	0	1	0	5430
ENST00000266542	C1RL	Coding	Click Me	1	-0.26	140	-31.59	0	1	0	0	1841
FTMT22200000909	CATG00000087350.1	Coding	Click Me	1	-0.304	149	-24.04	0	1	0	0	1000
ENST00000549396	PPFIA2	Coding	Click Me	1	-0.479	155	-26.59	1	0	0	0	1719
ENST00000368508	ROS1	Coding	Click Me	1	-0.536	152	-24.9	1	0	0	0	1119
ENST00000399518	PLA2G4E	Coding	Click Me	1	-0.247	147	-24.8	0	1	0	0	2172
ENST00000236877	SLC8A2	Coding	Click Me	1	-0.215	146	-30.5	0	1	0	0	2072
ENST00000382998	CTIF	Coding	Click Me	1	-0.182	159	-25.85	0	1	0	0	2347
ENST00000509403	AC010255.3	Coding	Click Me	1	-0.231	161	-33.23	0	1	0	0	1307
ENST00000547754	GAS2L3	Coding	Click Me	1	-0.195	143	-26.46	0	1	0	0	3396
ENST00000374050	ATP6V1G1	Coding	Click Me	1	-0.568	149	-24.46	1	0	0	0	1232
ENST00000340181	ETV7	Coding	Click Me	1	-0.179	140	-22.48	0	0	1	0	4136

## Sheet: other-14 28-tRNA-Lys-CTT-10
Supplementary Table 1. Small RNA sequencing data of patients with cervical cancer.
Predicted target genes for Other-14_28-tRNA-Lys-CTT-10
# Column A: Seqname, the name the sequence.
# Column B: GeneSymbol, the official gene symbol of the sequence.
# Column C: Type, the type of the transcipt.
# Column D: Diagrams, the diagrams illustrate key features for miRNA binding. See Ref [1,2] for details.
# Column E: Total, the total number of the binding sites on the targets.
# Column F: Context+, the sum of the context+ scores used in TargetScan after version 6.0. More negative is better. See Ref [3] for details.
# Column G: Structure, the sum of the structure scores used in miRanda (Ref [4]). The higher the better.
# Column H: Energy, the sum of the free energy predicted by miRanda (Ref [4]). More negative is better.
# Column I ~ Column L: Counting numbers for different seed match types
# Reference:
[1] Grimson A., et al. MicroRNA Targeting Specificity in Mammals: Determinants beyond Seed Pairing. Molecular Cell, Volume 27, Issue 1, 91-105, 6 July 2007.
[2] Amy E. Pasquinelli. MicroRNAs and their targets: recognition, regulation and an emerging reciprocal relationship. Nature Reviews Genetics, Volume 13, 271-282, 1 April 2012.
[3] David M Garcia., et al. Weak Seed-Pairing Stability and High Target-Site Abundance Decrease the Proficiency of lsy-6 and Other miRNAs. Nat. Struct. Mol. Biol., Volume 18, 1139-1146, 2011.
[4] Enright AJ., el al. miRanda algorithm: MicroRNA targets in Drosophila. Genome Biology, Volume 5, R1, 2003.
Target genes for Other-14_28-tRNA-Lys-CTT-10
Target			Sites		TargetScan	miranda		Seed match types				Annotations
Seqname	GeneSymbol	Type	Diagrams	Total	Context+	Structure	Energy	8mer-1a	7mer-m8	7mer-1a	Imperfect	UTR Length
MICT00000317204	CATG00000091028.1	Coding	Click Me	1	-0.261	146	-17.45	0	1	0	0	1000
ENST00000306117	KCNS1	Coding	Click Me	1	-0.277	146	-16.8	0	1	0	0	2561
ENST00000062104	NNAT	Coding	Click Me	1	-0.495	144	-13.45	1	0	0	0	931
ENST00000180173	MTMR7	Coding	Click Me	1	-0.374	149	-14.94	1	0	0	0	3087
MICT00000015416	CATG00000008429.1	Coding	Click Me	1	-0.64	141	-12.38	1	0	0	0	1000
ENST00000371795	IFIT5	Coding	Click Me	1	-0.223	143	-14.83	0	1	0	0	2354
ENST00000324817	MED14	Coding	Click Me	1	-0.17	153	-19.14	0	1	0	0	3500
ENST00000320580	PACS1	Coding	Click Me	1	-0.121	143	-15.18	0	1	0	0	5014
ENST00000238156	CCDC92	Coding	Click Me	1	-0.294	145	-15.26	0	1	0	0	1431
ENST00000317357	SOBP	Coding	Click Me	1	-0.504	140	-11.24	1	0	0	0	3106
ENST00000618819	PTPN9	Coding	Click Me	1	-0.316	142	-10.91	1	0	0	0	5518
MICT00000281909	CATG00000075771.1	Coding	Click Me	1	-0.19	140	-14	0	1	0	0	1000
HBMT00000611233	CATG00000032482.1	Coding	Click Me	1	-0.235	140	-11.7	0	1	0	0	1000
HBMT00000232437	CATG00000003943.1	Coding	Click Me	1	-0.196	147	-15.65	0	1	0	0	1000
ENST00000248071	KLF2	Coding	Click Me	1	-0.157	143	-16.44	0	1	0	0	6306
ENST00000361722	TBKBP1	Coding	Click Me	1	-0.423	147	-17.21	1	0	0	0	1437
MICT00000250066	CATG00000061721.1	Coding	Click Me	1	-0.333	140	-13.19	0	1	0	0	1000
ENST00000413366	PRKCA	Coding	Click Me	1	-0.218	140	-13.66	0	1	0	0	6727
HBMT00000002449	CATG00000007455.1	Coding	Click Me	1	-0.194	141	-12.57	0	1	0	0	1000
ENST00000358825	PRDM10	Coding	Click Me	1	-0.598	143	-12.11	1	0	0	0	2607
ENCT00000012768	CATG00000020670.1	Coding	Click Me	1	-0.308	151	-18.93	0	1	0	0	1000
ENCT00000271921	CATG00000056197.1	Coding	Click Me	1	-0.515	149	-15.46	1	0	0	0	1000
ENCT00000073980	CATG00000004584.1	Coding	Click Me	1	-0.244	145	-15.4	0	1	0	0	1000
MICT00000029505	CATG00000033287.1	Coding	Click Me	1	-0.494	145	-14.94	1	0	0	0	1000
MICT00000154119	CATG00000032385.1	Coding	Click Me	2	-0.472	284	-24.89	0	2	0	0	1000
ENST00000259605	RNF38	Coding	Click Me	1	-0.309	152	-18.67	0	1	0	0	3356
ENST00000306077	TMEM43	Coding	Click Me	1	-0.374	148	-18.28	0	1	0	0	3377
MICT00000301344	CATG00000083541.1	Coding	Click Me	1	-0.273	144	-14.62	0	1	0	0	794
ENST00000264033	CBL	Coding	Click Me	1	-0.177	140	-15.21	0	1	0	0	8368
ENST00000477717	ST6GALNAC5	Coding	Click Me	1	-0.411	141	-14.65	0	1	0	0	3467
ENST00000306954	GON7	Coding	Click Me	1	-0.327	140	-12.13	0	1	0	0	2722
ENST00000551295	CNTN1	Coding	Click Me	1	-0.276	153	-19.45	0	1	0	0	2452
HBMT00000345314	CATG00000013851.1	Coding	Click Me	1	-0.212	140	-11.9	0	1	0	0	1000
ENST00000252071	ACTR3C	Coding	Click Me	1	-0.641	140	-11.23	1	0	0	0	396
NM_001279350	REXO4	Coding	Click Me	1	-0.22	156	-20.89	0	1	0	0	895
ENST00000396410	PDXDC1	Coding	Click Me	1	-0.354	143	-13.22	0	1	0	0	2055
ENCT00000297820	CATG00000062999.1	Coding	Click Me	1	-0.338	140	-11.11	0	1	0	0	1000
ENST00000302516	SF3B3	Coding	Click Me	1	-0.216	140	-13.53	0	1	0	0	5855
ENST00000394077	RPL24	Coding	Click Me	1	-0.347	144	-13.86	0	1	0	0	3477
MICT00000296176	CATG00000082420.1	Coding	Click Me	1	-0.343	143	-15.18	0	1	0	0	1000
ENST00000356392	CCDC151	Coding	Click Me	1	-0.408	141	-13.55	0	1	0	0	231
ENST00000505065	CDC42SE2	Coding	Click Me	1	-0.138	140	-11.7	0	1	0	0	3576
HBMT00000439253	CATG00000020287.1	Coding	Click Me	1	-0.209	145	-15.13	0	1	0	0	1000
MICT00000247025	CATG00000061099.1	Coding	Click Me	1	-0.245	142	-13.38	0	1	0	0	1000
ENST00000243457	KCNJ2	Coding	Click Me	1	-0.201	140	-11.81	0	1	0	0	3725
HBMT00000597373	CATG00000031212.1	Coding	Click Me	1	-0.188	140	-11.38	0	1	0	0	1000
ENST00000270257	GEMIN7	Coding	Click Me	1	-0.286	147	-13.52	0	1	0	0	1014
ENST00000448921	SERPINA1	Coding	Click Me	1	-0.328	140	-15.6	0	1	0	0	1702
ENST00000422945	PPP2R5C	Coding	Click Me	1	-0.645	140	-12.65	1	0	0	0	2719
ENST00000391884	KCNJ14	Coding	Click Me	1	-0.521	140	-12	1	0	0	0	2201
ENST00000640345	AC092718.8	Coding	Click Me	1	-0.287	140	-13.53	0	1	0	0	2292
ENST00000368149	ARHGAP18	Coding	Click Me	1	-0.415	149	-16.84	0	1	0	0	2985
MICT00000368111	CATG00000107272.1	Coding	Click Me	1	-0.331	143	-15.11	0	1	0	0	1000
ENST00000458420	CLSTN2	Coding	Click Me	1	-0.124	145	-17.21	0	1	0	0	11999
MICT00000211400	CATG00000047322.1	Coding	Click Me	1	-0.275	143	-13.07	0	1	0	0	1000
ENST00000371935	REXO4	Coding	Click Me	1	-0.22	156	-20.89	0	1	0	0	894
ENCT00000299154	CATG00000063458.1	Coding	Click Me	1	-0.258	140	-14.09	0	1	0	0	1000
ENST00000381055	ADAMTS6	Coding	Click Me	1	-0.326	141	-14.65	0	1	0	0	3100
ENST00000254066	RARA	Coding	Click Me	1	-0.284	151	-17.09	0	1	0	0	570
ENST00000344120	SPRY4	Coding	Click Me	1	-0.182	151	-15.83	1	0	0	0	3782
ENST00000311129	PPP2R1B	Coding	Click Me	1	-0.267	144	-16.03	0	1	0	0	1597
ENST00000265627	PON3	Coding	Click Me	1	-0.416	140	-10.91	1	0	0	0	2184
ENCT00000202697	CATG00000038771.1	Coding	Click Me	1	-0.541	148	-13.56	1	0	0	0	1000
MICT00000052695	CATG00000001316.1	Coding	Click Me	1	-0.198	140	-11.7	0	1	0	0	1000
ENST00000373091	GRIK3	Coding	Click Me	1	-0.121	142	-13.57	0	1	0	0	6324
ENST00000395275	CALN1	Coding	Click Me	1	-0.112	147	-15.65	0	1	0	0	8284
ENST00000301785	HNRNPUL2	Coding	Click Me	1	-0.326	153	-17.13	0	1	0	0	2674
MICT00000325380	CATG00000092473.1	Coding	Click Me	2	-0.651	289	-26.27	0	2	0	0	1000
ENST00000391767	CACNG7	Coding	Click Me	1	-0.248	140	-12.29	0	1	0	0	1648
ENST00000359933	ATG2B	Coding	Click Me	1	-0.318	141	-12.57	0	1	0	0	4497
ENST00000383657	HACD2	Coding	Click Me	1	-0.309	148	-15.22	1	0	0	0	3337
HBMT00001233559	CATG00000084182.1	Coding	Click Me	1	-0.431	144	-13.81	1	0	0	0	1000
ENCT00000271943	CATG00000056217.1	Coding	Click Me	1	-0.273	144	-16.61	0	1	0	0	1000
ENST00000300258	TCP10L	Coding	Click Me	1	-0.364	140	-14.2	0	1	0	0	1933
ENST00000261332	ZNF24	Coding	Click Me	1	-0.329	153	-16.76	1	0	0	0	5027
ENST00000367090	TMEM181	Coding	Click Me	1	-0.394	140	-10.91	1	0	0	0	3547
ENST00000397885	PUM3	Coding	Click Me	1	-0.217	146	-19.29	0	1	0	0	1246
ENST00000267257	PXN	Coding	Click Me	1	-0.239	147	-17.64	0	1	0	0	1875
ENST00000487519	TFAM	Coding	Click Me	1	-0.214	144	-13.86	0	1	0	0	6398
ENCT00000141724	CATG00000022986.1	Coding	Click Me	1	-0.276	140	-11.79	0	1	0	0	1000
ENST00000326446	ARL6IP6	Coding	Click Me	1	-0.242	148	-18.56	0	1	0	0	2554
ENST00000380191	GDI2	Coding	Click Me	1	-0.566	141	-11.43	1	0	0	0	2568
FTMT23200004806	CATG00000099762.1	Coding	Click Me	1	-0.234	140	-11.51	0	1	0	0	575
HBMT00000541937	CATG00000027114.1	Coding	Click Me	1	-0.354	140	-10.98	1	0	0	0	962
ENST00000361272	CNOT7	Coding	Click Me	1	-0.367	151	-19.45	0	1	0	0	3996
FTMT24800003332	CATG00000009256.1	Coding	Click Me	1	-0.365	140	-11.11	0	1	0	0	1000
ENST00000371942	REXO4	Coding	Click Me	1	-0.22	156	-20.89	0	1	0	0	928
ENST00000353442	LMBR1	Coding	Click Me	1	-0.251	148	-14.57	1	0	0	0	6287
ENST00000401878	RBM33	Coding	Click Me	1	-0.102	146	-19.46	0	1	0	0	6438
ENST00000332772	SIMC1	Coding	Click Me	1	-0.524	140	-10.91	1	0	0	0	544
FTMT24800002966	CATG00000009093.1	Coding	Click Me	2	-0.713	289	-26.27	0	2	0	0	1000
ENST00000423059	THSD7A	Coding	Click Me	1	-0.355	150	-18.67	0	1	0	0	5437
ENST00000608382	ZBTB25	Coding	Click Me	1	-0.202	143	-14.03	0	1	0	0	8872
ENCT00000260683	CATG00000053041.1	Coding	Click Me	1	-0.225	145	-15.41	0	1	0	0	1000
ENST00000424789	TANC2	Coding	Click Me	1	-0.161	140	-14.68	0	1	0	0	5751
ENST00000281631	PARP8	Coding	Click Me	1	-0.631	142	-10.91	1	0	0	0	4454
ENST00000358913	MYPN	Coding	Click Me	1	-0.241	145	-14.94	1	0	0	0	13128
MICT00000362324	CATG00000106129.1	Coding	Click Me	1	-0.28	141	-12.77	0	1	0	0	1000
ENST00000374518	BMS1	Coding	Click Me	1	-0.269	140	-13.18	0	1	0	0	3841
ENST00000274532	TIMD4	Coding	Click Me	1	-0.225	144	-15.52	0	1	0	0	3723
HBMT00001471007	CATG00000106826.1	Coding	Click Me	1	-0.253	141	-13.44	0	1	0	0	865
ENST00000349314	APOL3	Coding	Click Me	1	-0.198	149	-15.44	0	1	0	0	870
FTMT28000001496	CATG00000052900.1	Coding	Click Me	1	-0.248	141	-13.61	0	1	0	0	1000
ENCT00000447516	CATG00000105907.1	Coding	Click Me	1	-0.273	150	-16.28	0	1	0	0	1000
ENST00000238667	FLVCR2	Coding	Click Me	1	-0.208	140	-14.2	0	1	0	0	1697
ENST00000539247	ARMCX6	Coding	Click Me	1	-0.374	145	-15.03	0	1	0	0	592
ENST00000252602	MRPL34	Coding	Click Me	1	-0.262	145	-17.21	0	1	0	0	464
ENST00000298542	FRMD7	Coding	Click Me	1	-0.376	141	-14.96	0	1	0	0	877
FTMT21200002522	CATG00000060036.1	Coding	Click Me	1	-0.47	152	-18.05	1	0	0	0	1000
ENST00000338821	ATP9A	Coding	Click Me	1	-0.171	140	-10.91	1	0	0	0	4697
ENST00000251871	MED17	Coding	Click Me	1	-0.312	140	-12.54	0	1	0	0	2631
ENST00000310441	HCFC1	Coding	Click Me	1	-0.209	149	-14.42	0	1	0	0	1794
ENST00000436874	VEZT	Coding	Click Me	1	-0.226	146	-15.38	0	1	0	0	4654
ENST00000641868	OR2M4	Coding	Click Me	1	-0.223	140	-13.18	0	1	0	0	4815
ENST00000268070	ADAMTS17	Coding	Click Me	1	-0.163	151	-17.24	0	1	0	0	2964
ENST00000521180	ST3GAL1	Coding	Click Me	1	-0.316	148	-17.51	0	1	0	0	4911
ENST00000320785	KIF1C	Coding	Click Me	1	-0.247	140	-11.98	1	0	0	0	6285
HBMT00000770827	CATG00000043658.1	Coding	Click Me	1	-0.277	155	-19.83	0	1	0	0	1000
ENST00000389100	RNF180	Coding	Click Me	1	-0.334	146	-15.38	0	1	0	0	3055
ENCT00000346150	CATG00000076354.1	Coding	Click Me	1	-0.515	141	-13.02	1	0	0	0	1000
ENST00000542230	TMEM50B	Coding	Click Me	1	-0.256	141	-15.91	0	1	0	0	1733
ENST00000640655	AC116366.3	Coding	Click Me	1	-0.542	143	-13.95	1	0	0	0	3715
ENST00000450993	PLCD4	Coding	Click Me	1	-0.523	141	-10.99	1	0	0	0	609
ENCT00000424171	CATG00000098582.1	Coding	Click Me	1	-0.201	140	-11.7	0	1	0	0	1000
ENCT00000044807	CATG00000111122.1	Coding	Click Me	1	-0.437	151	-16.57	1	0	0	0	991
HBMT00000303718	CATG00000008616.1	Coding	Click Me	1	-0.221	148	-16.08	0	1	0	0	362
ENCT00000097705	CATG00000010950.1	Coding	Click Me	2	-0.763	288	-28.17	1	1	0	0	1000
ENCT00000179109	CATG00000032638.1	Coding	Click Me	1	-0.477	143	-12.6	1	0	0	0	1000
ENST00000379287	GFOD1	Coding	Click Me	1	-0.241	147	-16.41	1	0	0	0	6913
ENST00000380639	PTCD2	Coding	Click Me	1	-0.143	140	-12.34	0	1	0	0	4495
ENST00000259154	KCTD3	Coding	Click Me	1	-0.381	141	-14.57	0	1	0	0	2386
MICT00000303276	CATG00000083821.1	Coding	Click Me	1	-0.339	144	-17.01	0	1	0	0	1000
ENST00000400256	COLEC12	Coding	Click Me	1	-0.655	147	-14.57	1	0	0	0	690
ENCT00000278074	CATG00000057491.1	Coding	Click Me	1	-0.262	148	-15.65	0	1	0	0	1000
ENST00000288135	KIT	Coding	Click Me	1	-0.311	145	-15.41	0	1	0	0	2226
ENST00000366898	PRKN	Coding	Click Me	1	-0.173	150	-18.08	0	1	0	0	2690
FTMT25200007594	CATG00000016284.1	Coding	Click Me	1	-0.251	140	-11.89	0	1	0	0	413
ENST00000434783	FAM230A	Coding	Click Me	1	-0.467	140	-14.01	1	0	0	0	5952
ENST00000296522	HPGD	Coding	Click Me	1	-0.272	147	-16.14	0	1	0	0	2783
MICT00000142994	CATG00000030840.1	Coding	Click Me	1	-0.195	140	-11.11	0	1	0	0	1000
ENST00000320954	CRTAP	Coding	Click Me	1	-0.241	143	-13.11	1	0	0	0	5601
ENST00000419235	DUSP22	Coding	Click Me	1	-0.227	143	-13.71	0	1	0	0	2404
ENST00000605587	C17orf50	Coding	Click Me	1	-0.265	147	-14.42	0	1	0	0	461
ENST00000378509	SLC35B4	Coding	Click Me	1	-0.608	147	-13.16	1	0	0	0	5501
ENST00000256996	DDB2	Coding	Click Me	1	-0.287	140	-14.25	0	1	0	0	852
ENCT00000451796	CATG00000107372.1	Coding	Click Me	1	-0.22	152	-18.25	0	1	0	0	1000
ENCT00000004031	CATG00000107162.1	Coding	Click Me	1	-0.3	145	-14.99	0	1	0	0	1000
ENST00000290167	WNT4	Coding	Click Me	1	-0.276	140	-13.18	0	1	0	0	2745
MICT00000084007	CATG00000009934.1	Coding	Click Me	1	-0.573	161	-22.41	1	0	0	0	1000
ENST00000376351	GPR158	Coding	Click Me	1	-0.213	152	-16.92	1	0	0	0	2954
MICT00000170306	CATG00000038779.1	Coding	Click Me	1	-0.266	140	-11.38	0	1	0	0	1000
ENCT00000136603	CATG00000021838.1	Coding	Click Me	1	-0.549	149	-16.64	1	0	0	0	1000
ENST00000334062	RASA3	Coding	Click Me	1	-0.315	144	-14.76	0	1	0	0	1564
ENST00000235372	PRDM2	Coding	Click Me	1	-0.278	140	-11.38	0	1	0	0	1944
ENST00000328459	TTC7B	Coding	Click Me	1	-0.663	146	-13.11	1	0	0	0	780
ENST00000315322	IFT22	Coding	Click Me	1	-0.29	140	-13.18	0	1	0	0	478
ENCT00000161593	CATG00000028260.1	Coding	Click Me	1	-0.49	140	-14.65	1	0	0	0	1000
ENST00000381883	PLPP6	Coding	Click Me	1	-0.286	140	-14.27	0	1	0	0	2009
MICT00000382669	CATG00000112890.1	Coding	Click Me	1	-0.605	140	-10.91	1	0	0	0	1000
MICT00000190665	CATG00000043116.1	Coding	Click Me	1	-0.339	142	-12.51	0	1	0	0	1000
MICT00000222194	CATG00000053966.1	Coding	Click Me	1	-0.215	140	-14.85	0	1	0	0	1000
ENST00000367204	SOX13	Coding	Click Me	1	-0.283	151	-19.04	0	1	0	0	1609
MICT00000232033	CATG00000057419.1	Coding	Click Me	1	-0.553	142	-10.91	1	0	0	0	1000
ENST00000332947	FAM43B	Coding	Click Me	1	-0.255	148	-15.25	0	1	0	0	1057
ENST00000392288	ZNF493	Coding	Click Me	1	-0.344	140	-13.5	0	1	0	0	4033
ENST00000296736	TIGD6	Coding	Click Me	1	-0.124	143	-15.19	0	1	0	0	3763
ENST00000327347	SEPHS1	Coding	Click Me	1	-0.275	148	-16.12	0	1	0	0	3675
ENST00000244769	ATXN1	Coding	Click Me	1	-0.262	146	-13.11	1	0	0	0	7217
ENST00000599848	UPF1	Coding	Click Me	1	-0.307	140	-11.03	1	0	0	0	1712
ENST00000249066	APOL2	Coding	Click Me	1	-0.179	149	-15.44	0	1	0	0	1194
ENST00000378823	RAD50	Coding	Click Me	1	-0.478	143	-13.95	1	0	0	0	3971
MICT00000277457	CATG00000074949.1	Coding	Click Me	1	-0.129	140	-11.45	0	1	0	0	1000
ENST00000443967	SIMC1	Coding	Click Me	1	-0.524	140	-10.91	1	0	0	0	546
ENST00000380817	SBF1	Coding	Click Me	1	-0.251	143	-13.93	0	1	0	0	2142
ENST00000600228	ZNF616	Coding	Click Me	1	-0.512	141	-14.74	1	0	0	0	2615
MICT00000051362	CATG00000116938.1	Coding	Click Me	1	-0.245	146	-15.38	0	1	0	0	1000
ENST00000409299	PXMP4	Coding	Click Me	1	-0.22	149	-17.2	0	1	0	0	4962
HBMT00000043737	CATG00000033941.1	Coding	Click Me	1	-0.323	151	-18.46	0	1	0	0	1000
FTMT22000002399	CATG00000075756.1	Coding	Click Me	1	-0.511	140	-11.47	1	0	0	0	1000
ENST00000295119	NUP35	Coding	Click Me	1	-0.615	151	-16.62	1	0	0	0	1706
ENST00000320005	CNGB3	Coding	Click Me	1	-0.266	141	-12.58	0	1	0	0	1869
MICT00000155430	CATG00000032523.1	Coding	Click Me	1	-0.471	140	-12.98	1	0	0	0	1000
ENST00000265094	FBXW11	Coding	Click Me	1	-0.523	140	-10.91	1	0	0	0	2575
MICT00000254694	CATG00000062846.1	Coding	Click Me	1	-0.342	142	-13.57	0	1	0	0	1000
MICT00000236022	CATG00000058026.1	Coding	Click Me	1	-0.253	140	-11.38	0	1	0	0	1000
HBMT00000607830	CATG00000032100.1	Coding	Click Me	1	-0.284	153	-18.46	0	1	0	0	1000
ENST00000378083	KCNAB2	Coding	Click Me	1	-0.175	152	-16.52	0	1	0	0	2605
ENST00000296702	TCERG1	Coding	Click Me	1	-0.248	146	-17.92	0	1	0	0	2699
ENCT00000092207	CATG00000009204.1	Coding	Click Me	1	-0.342	141	-12.58	0	1	0	0	1000
ENST00000341199	SIMC1	Coding	Click Me	1	-0.525	140	-10.91	1	0	0	0	540
ENST00000370096	COL11A1	Coding	Click Me	1	-0.227	141	-18.85	0	0	1	0	1552
ENST00000609713	KCNJ6	Coding	Click Me	1	-0.169	152	-21.26	0	1	0	0	17783
ENST00000397843	ARHGEF12	Coding	Click Me	1	-0.218	141	-12.57	0	1	0	0	4859
ENST00000280871	SLC2A13	Coding	Click Me	1	-0.257	140	-15.38	0	1	0	0	5005
HBMT00000662962	CATG00000035909.1	Coding	Click Me	1	-0.239	140	-13.18	0	1	0	0	1000
ENST00000278071	ITPRIP	Coding	Click Me	1	-0.407	142	-17.13	0	1	0	0	4710
ENST00000274000	AP1AR	Coding	Click Me	1	-0.211	140	-16.9	0	1	0	0	4314
ENST00000430704	SIMC1	Coding	Click Me	1	-0.524	140	-10.91	1	0	0	0	409
MICT00000278098	CATG00000079024.1	Coding	Click Me	1	-0.289	147	-16.96	0	1	0	0	1000
MICT00000235293	CATG00000057919.1	Coding	Click Me	1	-0.156	145	-15.14	0	1	0	0	1000
ENST00000309241	PPARGC1B	Coding	Click Me	1	-0.16	146	-13.58	0	1	0	0	7464
ENST00000359947	PTPRF	Coding	Click Me	1	-0.28	144	-14.68	0	1	0	0	1663
ENST00000379333	SLC23A2	Coding	Click Me	1	-0.221	140	-13.92	0	1	0	0	4616
ENST00000358025	SYNE2	Coding	Click Me	1	-0.351	145	-17.21	0	1	0	0	923
MICT00000066053	CATG00000003494.1	Coding	Click Me	1	-0.531	148	-14.65	1	0	0	0	1000
ENST00000336273	MTDH	Coding	Click Me	1	-0.252	147	-14.85	1	0	0	0	5610
ENST00000267859	BNIP2	Coding	Click Me	1	-0.398	141	-12.38	1	0	0	0	4925
ENST00000315576	ADGRE2	Coding	Click Me	1	-0.491	142	-12.91	1	0	0	0	3843
ENCT00000228958	CATG00000044356.1	Coding	Click Me	1	-0.323	148	-15.41	0	1	0	0	1000
