# Supplementary material for: Identification of clinical trait-related small RNA biomarkers with weighted gene co-expression network analysis for personalized medicine in endocervical adenocarcinoma
Source: Aging (Albany NY). 2021 Sep 20;13(18):22361–74. doi: 10.18632/aging.203543 (PMC8507262; doi:10.18632/aging.203543)
Supplement: Supplementary Table 2 [file aging-13-203543-s002.xlsx]

## Sheet: DICER1+ANG+ELAC2+ELAC1
Supplementary Table 2. The qRT-PCR primers utilized in the study.
GeneID		Sequence
β-actin	F	GTGGCCGAGGACTTTGATTG
	R	CCTGTAACAACGCATCTCATATT
DICER1	F	TGGCTTCCTCCTGGTTATGTAG
	R	CTCATCCAGTTTGCCATTCG
ANG	F	CAAGAATGGAAACCCTCACAGA
	R	GAAGGCAAGGACAGCAGAGC3
ELAC2	F	AAGAAGTCAGTACCCAGAAATCATC
	R	TGTCCACCTGGTCTCCGTAAT
ELAC1	F	GAAACGCCCAGGTAAACTCAA
	R	ACTCCTCCATCACCCACAACC

## Sheet: miRNA+tDRs
GeneID		Sequence
U6	F	GCTTCGGCAGCACATATACTAAAAT
	R	CGCTTCACGAATTTGCGTGTCAT
hsa-miR-214-3p	F	GACAGCAGGCACAGACA
	R	TGCGTGTCGTGGAGTC
hsa-miR-195-5p	F	GGGGTAGCAGCACAGAAAT
	R	CAGTGCGTGTCGTGGAGT
other- 14:33-tRNA-Lys-CTT -1 -M2	F	AGTTCTACAGTCCGACGATCAGT
	R	CGATCTAGTCCCATGCTCTACC
tRF-1:32-Val-CAC-3	F	GTTTCCGTAGTGTAGCGGTTAT
	R	TTCCGATCTGGCGAATGTG
tRF-1:28-Gly-CCC-2	F	GCCGCTGGTGTAGTGGTATCA
	R	CGTGTGCTCTTCCGATCTTTG
other-14:28 -tRNA-Lys-CTT -10	F	GTTCTACAGTCCGACGATCAGT
	R	GCTCTTCCGATCTTATGCTCT
other-3:35 -tRNA-Lys-CTT -1 -M2	F	ACGATCCCGGCTAGCTCAGT
	R	CTTCCGATCTAGAGTCCCATGC
Other-13:26-tRNA-Lys-CTT-1-M11	F	GCCCGGCTAGCTCAGTCGGT
	R	TGGCGCCCAACGTGGGGCTCG
Other-2:23 -tRNA-Val-AAC-1-M7	F	GTTTCCGTAGTGTAGTGGTTATCA
	R	TGGTGTTTCCGCCCGGTTTCGA
